# Supplementary material for: The Rise and Fall of an Evolutionary Innovation: Contrasting Strategies of Venom Evolution in Ancient and Young Animals
Source: PubMed Central journal article supplement (PMC4619613; doi:10.1371/journal.pgen.1005596), 2015-10-22
Supplement: pgen.1005596.s001.pdf [file pgen.1005596.s001.pdf]

**Figure S1. Regression plot relating size and rate of toxin evolution**

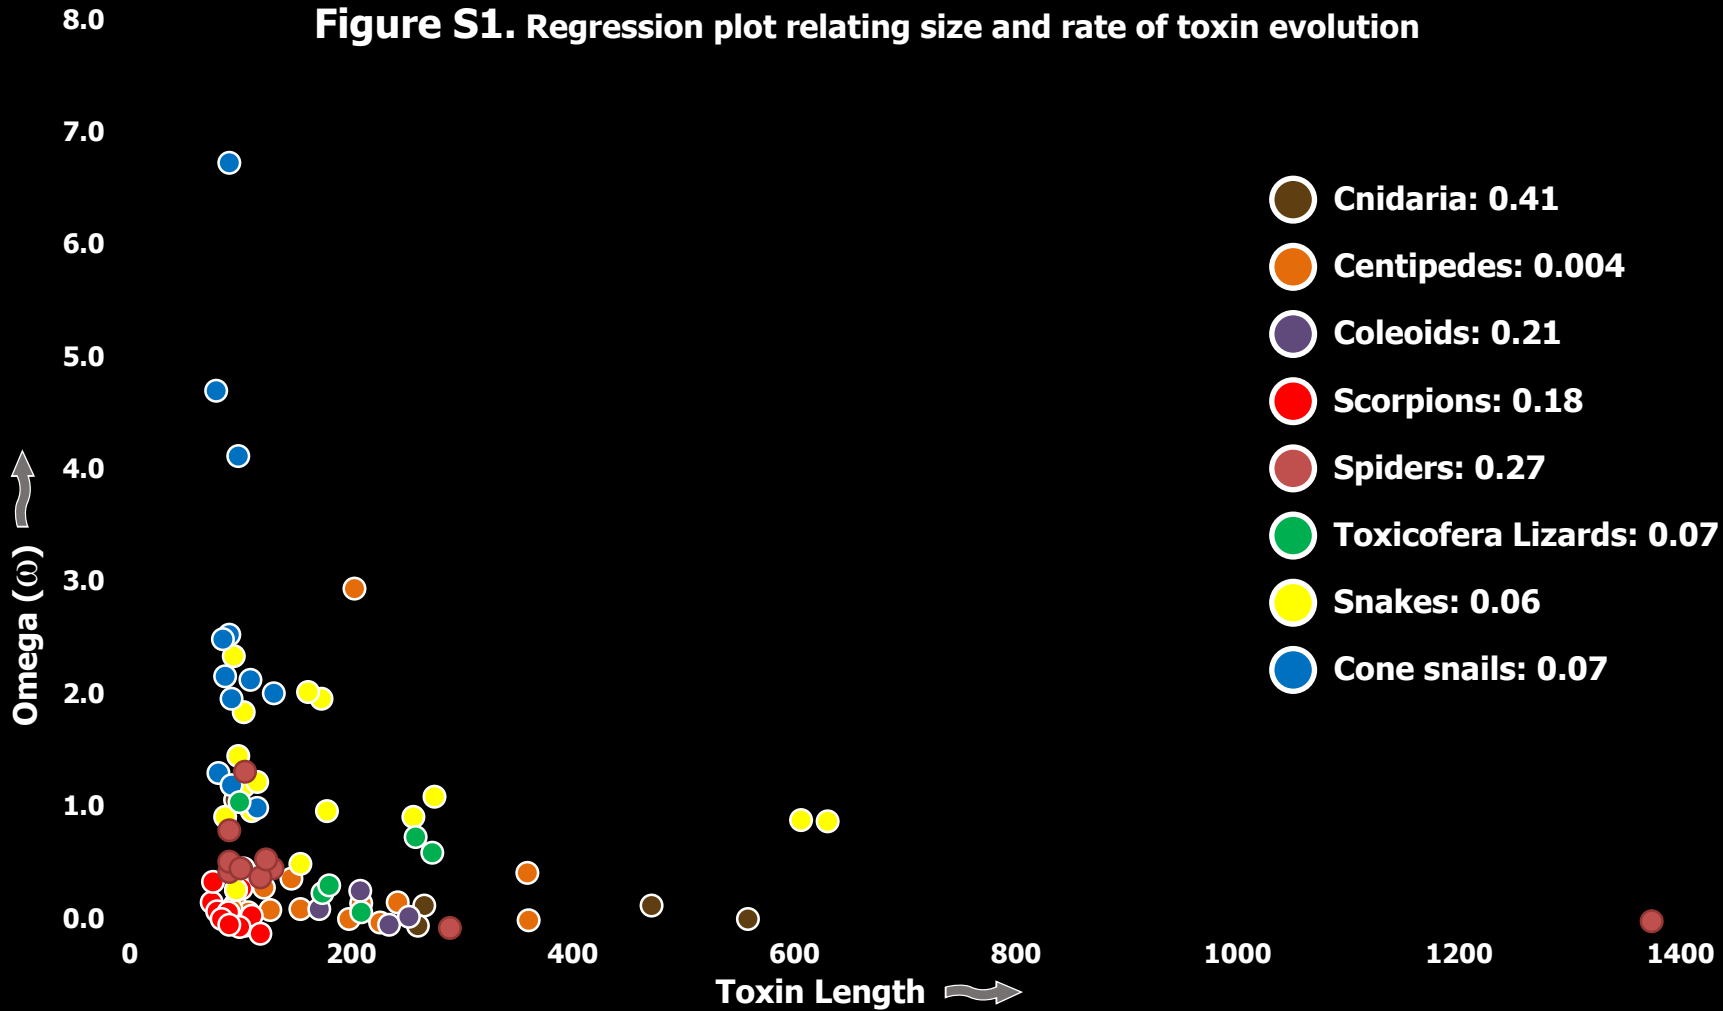

**Figure S1: Regression analyses of various toxin types in each of the examined venomous lineage is presented here. Omega values are plotted against the size/length of the respective toxin type. The coefficient of determination ( $r^2$ ) for each clade has also presented.  $r^2$  values closer to 0 suggest an absence of correlation between the size of the toxin and its omega (rate of evolution) value.**
