# Supplementary material for: The Rise and Fall of an Evolutionary Innovation: Contrasting Strategies of Venom Evolution in Ancient and Young Animals
Source: PubMed Central journal article supplement (PMC4619613; doi:10.1371/journal.pgen.1005596), 2015-10-22
Supplement: pgen.1005596.s002.pdf [file pgen.1005596.s002.pdf]

**Figure S2. Highly constrained toxins**

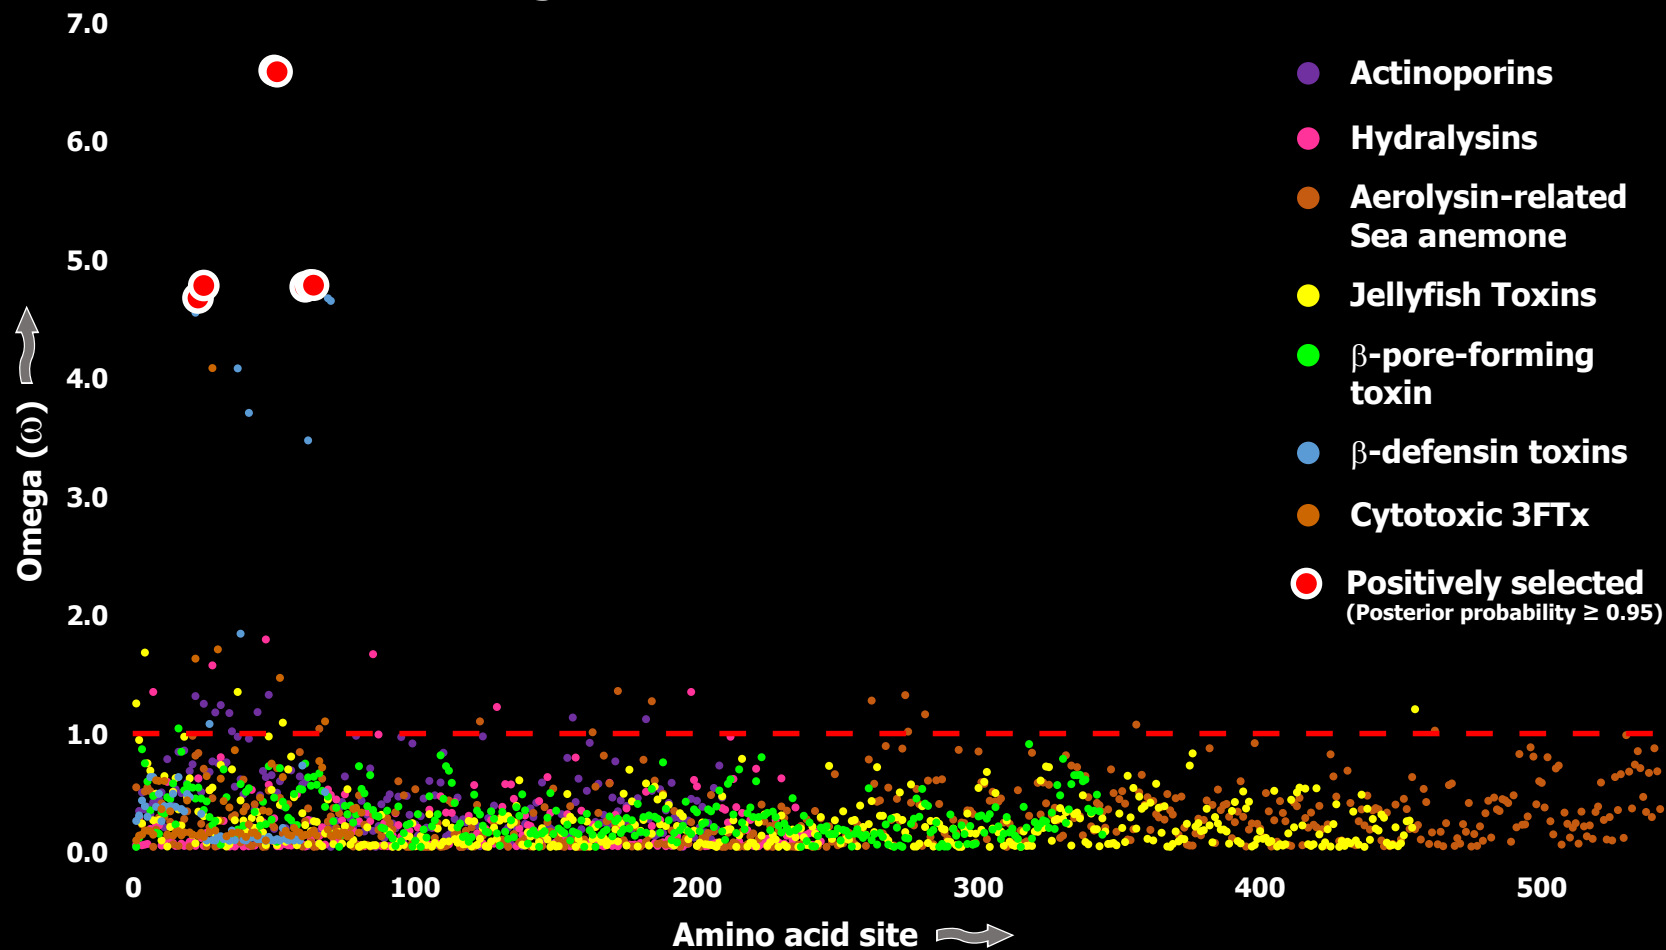

**Figure S2: Certain toxins are more constrained than others. A plot of site-specific  $\omega$  against amino acid positions for various toxin types is presented. Significantly detected positively selected sites (model 8; Bayes Empirical Bayes approach) are presented as large red circles. The red horizontal line represents the line of neutrality: points above and below this line indicate positive and negative selection, respectively.**
