# Supplementary material for: The Rise and Fall of an Evolutionary Innovation: Contrasting Strategies of Venom Evolution in Ancient and Young Animals
Source: PubMed Central journal article supplement (PMC4619613; doi:10.1371/journal.pgen.1005596), 2015-10-22
Supplement: pgen.1005596.s004.pdf [file pgen.1005596.s004.pdf]

**Table S2.** Nucleotide substitution saturation tests

|                                              | <b>Iss</b> | <b>Iss.c sym</b> |
|----------------------------------------------|------------|------------------|
| <b>Centipedes</b>                            |            |                  |
| $\beta$ -pore-forming toxins                 | 0.639      | 0.835            |
| CAP                                          | 0.352      | 1.050            |
| LDLA                                         | 0.555      | 0.778            |
| SLPTX01                                      | 0.5854     | 0.6704           |
| SLPTX04                                      | 0.5872     | 0.6176           |
| SLPTX05                                      | 0.6187     | 0.7141           |
| SLPTX10                                      | 0.476      | 0.786            |
| SLPTX11                                      | 0.1304     | 23.8151          |
| SLPTX12                                      | 0.2131     | 0.7047           |
| SLPTX13                                      | 0.4776     | 0.7150           |
| SLPTX15                                      | 0.6047     | 0.6080           |
| SLPTX16                                      | 0.558      | 0.809            |
| SLPTX17                                      | 0.5032     | 0.7068           |
| Novel family 01                              | 0.2770     | 0.7391           |
| Novel family 04                              | 0.0219     | 0.7376           |
| Novel family 06                              | 0.3491     | 0.7497           |
| Novel family 08                              | 0.3889     | 0.7488           |
| <b>Spiders</b>                               |            |                  |
| Family E ICK                                 | 0.767      | 0.863            |
| Funnel-web spider $\omega$ toxins            | 0.258      | 0.806            |
| Funnel-web spider $\kappa$ toxins            | 0.0377     | 0.7478           |
| Funnel-web spider $\omega/\kappa$ hexatoxins | 0.330      | 0.825            |
| Tarantula Huwentoxin-1 Family                | 0.609      | 0.941            |
| <i>Loxosceles</i> Sphingomyelinase D         | 0.442      | 0.810            |
| Kunitz-type Serine Protease Inhibitors       | 0.095      | 0.776            |
| Magi-1 Family toxins                         | 0.122      | 0.779            |
| $\alpha$ -Latrotoxins                        | 0.175      | 0.781            |
| U1-lycotoxin family                          | 0.069      | 0.777            |
| <b>Cnidaria</b>                              |            |                  |
| Actinoporins                                 | 0.592      | 0.778            |
| Hydralysins                                  | 0.2762     | 0.6124           |
| Aerolysin-related (sea anemone)              | 0.6042     | 0.7015           |
| Jellyfish toxins                             | 0.6631     | 0.7575           |
| KTx Type I                                   | 0.4868     | 0.6383           |
| KTx Type III                                 | 0.4186     | 0.6521           |
| NaTx Type I and Type II                      | 0.453      | 0.793            |
| SCRiPs                                       | 0.6126     | 0.4176           |
| <b>Scorpions</b>                             |            |                  |

|                                     |        |        |
|-------------------------------------|--------|--------|
| $\alpha$ -Nav-CS $\alpha$ / $\beta$ | 0.435  | 0.779  |
| $\beta$ -Nav-CS $\alpha$ / $\beta$  | 0.516  | 0.872  |
| Long-Kv-CS $\alpha$ / $\beta$       | 0.579  | 0.804  |
| Short-Kv-CS $\alpha$ / $\beta$      | 0.571  | 0.986  |
| Clv-CS $\alpha$ / $\beta$           | 0.3731 | 0.4560 |
| ICK                                 | 0.4698 | 0.7211 |
| DDH                                 | 0.2686 | 0.7583 |
| AMP                                 | 0.535  | 0.797  |
| Linear                              | 0.576  | 0.895  |
| Bradykinin Potentiating Peptides    | 0.4877 | 0.6394 |
| Anionic                             | 0.3341 | 0.4729 |
| Glycine-rich                        | 0.4978 | 0.7482 |

### Legend

**ISS:** index of substitution saturation

**ISS.c sym:** critical value assuming a symmetrical topology

**ISS < ISS.c:** Absence of significance saturation.
