# Supplementary material for: The Rise and Fall of an Evolutionary Innovation: Contrasting Strategies of Venom Evolution in Ancient and Young Animals
Source: PubMed Central journal article supplement (PMC4619613; doi:10.1371/journal.pgen.1005596), 2015-10-22
Supplement: pgen.1005596.s005.pdf [file pgen.1005596.s005.pdf]

**Table S3: Sequences Analyzed  
Centipedes**

| <b>β-PFT</b> |              |                                        |
|--------------|--------------|----------------------------------------|
| 1            | KC144049.1   | <i>Scolopendra subspinipes dehaani</i> |
| 2            | KC144990.1   | <i>Scolopendra subspinipes dehaani</i> |
| 3            | KC145028.1   | <i>Scolopendra subspinipes dehaani</i> |
| 4            | GASH01000017 | <i>Scolopendra morsitans</i>           |
| 5            | GASH01000021 | <i>Scolopendra morsitans</i>           |
| 6            | GASL01000003 | <i>Cormocephalus westwoodi</i>         |
| 7            | GASI01000025 | <i>Ethmostigmus rubripes</i>           |
| 8            | GASH01000019 | <i>Scolopendra morsitans</i>           |
| 9            | GASH01000020 | <i>Scolopendra morsitans</i>           |
| 10           | GASI01000018 | <i>Ethmostigmus rubripes</i>           |
| 11           | GASI01000019 | <i>Ethmostigmus rubripes</i>           |
| 12           | GASI01000020 | <i>Ethmostigmus rubripes</i>           |
| 13           | GASI01000022 | <i>Ethmostigmus rubripes</i>           |
| 14           | GASI01000021 | <i>Ethmostigmus rubripes</i>           |
| 15           | GASI01000023 | <i>Ethmostigmus rubripes</i>           |
| 16           | GASI01000024 | <i>Ethmostigmus rubripes</i>           |
| 17           | KC144624.1   | <i>Scolopendra subspinipes dehaani</i> |
| 18           | KC144623.1   | <i>Scolopendra subspinipes dehaani</i> |
| 19           | KC144831.1   | <i>Scolopendra subspinipes dehaani</i> |
| 20           | GASK01000007 | <i>Scolopendra alternans</i>           |
| 21           | GASH01000034 | <i>Scolopendra morsitans</i>           |
| 22           | KC144026.1   | <i>Scolopendra subspinipes dehaani</i> |
| 23           | GASH01000018 | <i>Scolopendra morsitans</i>           |
| 24           | GASL01000011 | <i>Cormocephalus westwoodi</i>         |
| 25           | GASH01000035 | <i>Scolopendra morsitans</i>           |
| 26           | GASL01000012 | <i>Cormocephalus westwoodi</i>         |
| 27           | GASI01000012 | <i>Ethmostigmus rubripes</i>           |
| 28           | GASI01000016 | <i>Ethmostigmus rubripes</i>           |
| 29           | GASI01000014 | <i>Ethmostigmus rubripes</i>           |
| 30           | GASI01000015 | <i>Ethmostigmus rubripes</i>           |
| 31           | GASI01000013 | <i>Ethmostigmus rubripes</i>           |
| 32           | GASI01000017 | <i>Ethmostigmus rubripes</i>           |
| 33           | GASK01000006 | <i>Scolopendra alternans</i>           |
| 34           | GASR01000015 | <i>Thereuopoda longicornis</i>         |

**Table S3:** Sequences Analyzed

|    |              |                                |
|----|--------------|--------------------------------|
| 35 | GASR01000059 | <i>Thereuopoda longicornis</i> |
| 36 | GASR01000070 | <i>Thereuopoda longicornis</i> |
| 37 | GASR01000077 | <i>Thereuopoda longicornis</i> |
| 38 | SMAR004243RA | <i>Strigamia maritima</i>      |
| 39 | SMAR004242RA | <i>Strigamia maritima</i>      |
| 40 | SMAR012417RA | <i>Strigamia maritima</i>      |
| 41 | JZ574184.1   | <i>Scolopendra viridis</i>     |

| CAP |              |                                        |
|-----|--------------|----------------------------------------|
| 1   | KC144027.1   | <i>Scolopendra subspinipes dehaani</i> |
| 2   | KC144855.1   | <i>Scolopendra subspinipes dehaani</i> |
| 3   | KC144397.1   | <i>Scolopendra subspinipes dehaani</i> |
| 4   | KC144210.1   | <i>Scolopendra subspinipes dehaani</i> |
| 5   | KC144762.1   | <i>Scolopendra subspinipes dehaani</i> |
| 6   | KC144967.1   | <i>Scolopendra subspinipes dehaani</i> |
| 7   | KC144970.1   | <i>Scolopendra subspinipes dehaani</i> |
| 8   | KC144362.1   | <i>Scolopendra subspinipes dehaani</i> |
| 9   | KC144334.1   | <i>Scolopendra subspinipes dehaani</i> |
| 10  | KC145115.1   | <i>Scolopendra subspinipes dehaani</i> |
| 11  | KC145116.1   | <i>Scolopendra subspinipes dehaani</i> |
| 12  | KC145031.1   | <i>Scolopendra subspinipes dehaani</i> |
| 13  | KC144888.1   | <i>Scolopendra subspinipes dehaani</i> |
| 14  | KC145067.1   | <i>Scolopendra subspinipes dehaani</i> |
| 15  | KC145069.1   | <i>Scolopendra subspinipes dehaani</i> |
| 16  | KC145077.1   | <i>Scolopendra subspinipes dehaani</i> |
| 17  | KC145076.1   | <i>Scolopendra subspinipes dehaani</i> |
| 18  | KC144555.1   | <i>Scolopendra subspinipes dehaani</i> |
| 19  | KC144414.1   | <i>Scolopendra subspinipes dehaani</i> |
| 20  | KC144549.1   | <i>Scolopendra subspinipes dehaani</i> |
| 21  | KC144061.1   | <i>Scolopendra subspinipes dehaani</i> |
| 22  | KC144605.1   | <i>Scolopendra subspinipes dehaani</i> |
| 23  | KC144960.1   | <i>Scolopendra subspinipes dehaani</i> |
| 24  | GASL01000013 | <i>Cormocephalus westwoodi</i>         |
| 25  | GASIO1000039 | <i>Ethmostigmus rubripes</i>           |
| 26  | GASIO1000040 | <i>Ethmostigmus rubripes</i>           |
| 27  | GASH01000046 | <i>Scolopendra morsitans</i>           |
| 28  | GASH01000047 | <i>Scolopendra morsitans</i>           |

**Table S3:** Sequences Analyzed

|    |              |                                |
|----|--------------|--------------------------------|
| 29 | GASH01000048 | <i>Scolopendra morsitans</i>   |
| 30 | GASH01000042 | <i>Scolopendra morsitans</i>   |
| 31 | GASH01000043 | <i>Scolopendra morsitans</i>   |
| 32 | GASH01000044 | <i>Scolopendra morsitans</i>   |
| 33 | GASK01000008 | <i>Scolopendra alternans</i>   |
| 34 | GASK01000009 | <i>Scolopendra alternans</i>   |
| 35 | GASK01000010 | <i>Scolopendra alternans</i>   |
| 36 | GASH01000049 | <i>Scolopendra morsitans</i>   |
| 37 | GASH01000045 | <i>Scolopendra morsitans</i>   |
| 38 | GASH01000050 | <i>Scolopendra morsitans</i>   |
| 39 | GASH01000036 | <i>Scolopendra morsitans</i>   |
| 40 | GASH01000037 | <i>Scolopendra morsitans</i>   |
| 41 | GASH01000038 | <i>Scolopendra morsitans</i>   |
| 42 | GASH01000039 | <i>Scolopendra morsitans</i>   |
| 43 | GASH01000040 | <i>Scolopendra morsitans</i>   |
| 44 | GASH01000041 | <i>Scolopendra morsitans</i>   |
| 45 | GASL01000014 | <i>Cormocephalus westwoodi</i> |
| 46 | GASL01000015 | <i>Cormocephalus westwoodi</i> |
| 47 | GASL01000016 | <i>Cormocephalus westwoodi</i> |
| 48 | GASI01000038 | <i>Ethmostigmus rubripes</i>   |
| 49 | GASI01000035 | <i>Ethmostigmus rubripes</i>   |
| 50 | GASI01000036 | <i>Ethmostigmus rubripes</i>   |
| 51 | GASI01000037 | <i>Ethmostigmus rubripes</i>   |
| 52 | GASR01000079 | <i>Thereuopoda longicornis</i> |
| 53 | GASR01000081 | <i>Thereuopoda longicornis</i> |
| 54 | GASR01000082 | <i>Thereuopoda longicornis</i> |
| 55 | GASR01000080 | <i>Thereuopoda longicornis</i> |
| 56 | GASH01000051 | <i>Scolopendra morsitans</i>   |
| 57 | GASH01000053 | <i>Scolopendra morsitans</i>   |
| 58 | GASH01000052 | <i>Scolopendra morsitans</i>   |
| 59 | SMAR001064   | <i>Strigamia maritima</i>      |
| 60 | SMAR001135   | <i>Strigamia maritima</i>      |
| 61 | SMAR012541   | <i>Strigamia maritima</i>      |
| 62 | SMAR002427   | <i>Strigamia maritima</i>      |
| 63 | SMAR001362   | <i>Strigamia maritima</i>      |
| 64 | SMAR010832   | <i>Strigamia maritima</i>      |
| 65 | SMAR001361   | <i>Strigamia maritima</i>      |

**Table S3: Sequences Analyzed**

|    |            |                           |
|----|------------|---------------------------|
| 66 | SMAR014499 | <i>Strigamia maritima</i> |
| 67 | SMAR002664 | <i>Strigamia maritima</i> |

| LDLA |                |                                        |
|------|----------------|----------------------------------------|
| 1    | GASI01000061.1 | <i>Ethmostigmus rubripes</i>           |
| 2    | KC144921.1     | <i>Scolopendra subspinipes dehaani</i> |
| 3    | KC144150.1     | <i>Scolopendra subspinipes dehaani</i> |
| 4    | KC144292.1     | <i>Scolopendra subspinipes dehaani</i> |
| 5    | KC145078.1     | <i>Scolopendra subspinipes dehaani</i> |
| 6    | KC144091.1     | <i>Scolopendra subspinipes dehaani</i> |
| 7    | GASL01000024.1 | <i>Cormocephalus westwoodi</i>         |
| 8    | GASK01000016.1 | <i>Scolopendra alternans</i>           |
| 9    | GASI01000074.1 | <i>Ethmostigmus rubripes</i>           |
| 11   | GASI01000060.1 | <i>Ethmostigmus rubripes</i>           |
| 12   | GASR01000087.1 | <i>Thereuopoda longicornis</i>         |
| 13   | GASI01000068.1 | <i>Ethmostigmus rubripes</i>           |
| 14   | GASI01000071.1 | <i>Ethmostigmus rubripes</i>           |
| 15   | GASH01000067.1 | <i>Scolopendra morsitans</i>           |
| 17   | GASH01000070.1 | <i>Scolopendra morsitans</i>           |
| 18   | GASK01000017.1 | <i>Scolopendra alternans</i>           |
| 19   | GASH01000068.1 | <i>Scolopendra morsitans</i>           |
| 20   | GASI01000072.1 | <i>Ethmostigmus rubripes</i>           |
| 21   | GASI01000073.1 | <i>Ethmostigmus rubripes</i>           |
| 22   | GASI01000069.1 | <i>Ethmostigmus rubripes</i>           |
| 23   | GASI01000070.1 | <i>Ethmostigmus rubripes</i>           |
| 24   | GASR01000088.1 | <i>Thereuopoda longicornis</i>         |
| 25   | GASI01000075.1 | <i>Ethmostigmus rubripes</i>           |
| 26   | GASI01000076.1 | <i>Ethmostigmus rubripes</i>           |
| 27   | GASI01000057.1 | <i>Ethmostigmus rubripes</i>           |
| 28   | GASI01000058.1 | <i>Ethmostigmus rubripes</i>           |
| 29   | GASI01000059.1 | <i>Ethmostigmus rubripes</i>           |
| 30   | GASH01000069.1 | <i>Scolopendra morsitans</i>           |
| 31   | KC144567.1     | <i>Scolopendra subspinipes dehaani</i> |
| 32   | GASH01000072.1 | <i>Scolopendra morsitans</i>           |
| 33   | GASH01000073.1 | <i>Scolopendra morsitans</i>           |
| 34   | GASH01000074.1 | <i>Scolopendra morsitans</i>           |
| 35   | KC144374.1     | <i>Scolopendra subspinipes dehaani</i> |

**Table S3:** Sequences Analyzed

|    |                |                                        |
|----|----------------|----------------------------------------|
| 36 | KC144795.1     | <i>Scolopendra subspinipes dehaani</i> |
| 37 | GASL01000025.1 | <i>Cormocephalus westwoodi</i>         |
| 38 | GASL01000026.1 | <i>Cormocephalus westwoodi</i>         |
| 39 | GASL01000027.1 | <i>Cormocephalus westwoodi</i>         |
| 40 | GASL01000028.1 | <i>Cormocephalus westwoodi</i>         |
| 41 | GASK01000019.1 | <i>Scolopendra alternans</i>           |
| 42 | KC144318.1     | <i>Scolopendra subspinipes dehaani</i> |
| 43 | KC144050.1     | <i>Scolopendra subspinipes dehaani</i> |
| 44 | GASI01000062.1 | <i>Ethmostigmus rubripes</i>           |
| 45 | GASI01000063.1 | <i>Ethmostigmus rubripes</i>           |
| 46 | GASI01000066.1 | <i>Ethmostigmus rubripes</i>           |
| 47 | GASI01000064.1 | <i>Ethmostigmus rubripes</i>           |
| 48 | GASI01000065.1 | <i>Ethmostigmus rubripes</i>           |
| 49 | KC144936.1     | <i>Scolopendra subspinipes dehaani</i> |
| 50 | GASH01000071.1 | <i>Scolopendra morsitans</i>           |
| 53 | SMAR004525     | <i>Strigamia maritima</i>              |
| 54 | JZ574180.1     | <i>Scolopendra viridis</i>             |

| <b>Novel Family 1</b> |                |                              |
|-----------------------|----------------|------------------------------|
| 1                     | GASI01000001.1 | <i>Ethmostigmus rubripes</i> |
| 2                     | GASI01000003.1 | <i>Ethmostigmus rubripes</i> |
| 3                     | GASI01000002.1 | <i>Ethmostigmus rubripes</i> |
| 4                     | GASH01000001.1 | <i>Scolopendra morsitans</i> |
| 5                     | GASI01000004.1 | <i>Ethmostigmus rubripes</i> |
| 6                     | GASK01000001.1 | <i>Scolopendra alternans</i> |
| 7                     | GASH01000002.1 | <i>Scolopendra morsitans</i> |

| <b>Novel Family 4</b> |              |                                |
|-----------------------|--------------|--------------------------------|
| 1                     | GASR01000001 | <i>Thereuopoda longicornis</i> |
| 2                     | GASR01000003 | <i>Thereuopoda longicornis</i> |
| 3                     | GASR01000002 | <i>Thereuopoda longicornis</i> |
| 4                     | GASR01000004 | <i>Thereuopoda longicornis</i> |
| 5                     | GASR01000007 | <i>Thereuopoda longicornis</i> |
| 6                     | GASR01000006 | <i>Thereuopoda longicornis</i> |
| 7                     | GASR01000005 | <i>Thereuopoda longicornis</i> |

**Table S3: Sequences Analyzed**

| <b>Novel Family 6</b> |              |                                        |
|-----------------------|--------------|----------------------------------------|
| 1                     | GASI01000008 | <i>Ethmostigmus rubripes</i>           |
| 2                     | GASI01000009 | <i>Ethmostigmus rubripes</i>           |
| 3                     | GASI01000010 | <i>Ethmostigmus rubripes</i>           |
| 4                     | GASJ01000009 | <i>Ethmostigmus rubripes epidermal</i> |
| 5                     | GASK01000002 | <i>Scolopendra alternans</i>           |
| 6                     | GASK01000003 | <i>Scolopendra alternans</i>           |
| 7                     | GASL01000002 | <i>Cormocephalus westwoodi</i>         |

| <b>Novel Family 8</b> |              |                                |
|-----------------------|--------------|--------------------------------|
| 1                     | GASR01000008 | <i>Thereuopoda longicornis</i> |
| 2                     | GASR01000011 | <i>Thereuopoda longicornis</i> |
| 3                     | GASR01000012 | <i>Thereuopoda longicornis</i> |
| 4                     | GASR01000009 | <i>Thereuopoda longicornis</i> |
| 5                     | GASR01000010 | <i>Thereuopoda longicornis</i> |
| 6                     | SMAR005835   | <i>Strigamia maritima</i>      |
| 7                     | SMAR005836   | <i>Strigamia maritima</i>      |

| <b>Novel Family 11</b> |              |                              |
|------------------------|--------------|------------------------------|
| 1                      | GASH01000013 | <i>Scolopendra morsitans</i> |
| 2                      | GASH01000014 | <i>Scolopendra morsitans</i> |
| 3                      | GASH01000015 | <i>Scolopendra morsitans</i> |
| 4                      | GASH01000016 | <i>Scolopendra morsitans</i> |
| 5                      | GASK01000004 | <i>Scolopendra alternans</i> |

| <b>SCUTX02</b> |                         |                     |
|----------------|-------------------------|---------------------|
| 1              | Thereuopoda longicornis | <i>GASR01000101</i> |
| 2              | Thereuopoda longicornis | <i>GASR01000102</i> |
| 3              | Thereuopoda longicornis | <i>GASR01000103</i> |
| 4              | Thereuopoda longicornis | <i>GASR01000104</i> |
| 5              | Thereuopoda longicornis | <i>GASR01000105</i> |
| 6              | Thereuopoda longicornis | <i>GASR01000106</i> |

| <b>SLPTX1</b> |              |                                |
|---------------|--------------|--------------------------------|
| 1             | GASR01000113 | <i>Thereuopoda longicornis</i> |

**Table S3: Sequences Analyzed**

|    |              |                                        |
|----|--------------|----------------------------------------|
| 2  | GASR01000112 | <i>Thereuopoda longicornis</i>         |
| 3  | GASR01000111 | <i>Thereuopoda longicornis</i>         |
| 4  | GASR01000114 | <i>Thereuopoda longicornis</i>         |
| 5  | GASI01000095 | <i>Ethmostigmus rubripes</i>           |
| 6  | GASI01000096 | <i>Ethmostigmus rubripes</i>           |
| 7  | GASI01000092 | <i>Ethmostigmus rubripes</i>           |
| 8  | GASI01000093 | <i>Ethmostigmus rubripes</i>           |
| 9  | GASI01000094 | <i>Ethmostigmus rubripes</i>           |
| 10 | GASL01000036 | <i>Cormocephalus westwoodi</i>         |
| 11 | GASJ01000006 | <i>Ethmostigmus rubripes epidermis</i> |
| 12 | GASJ01000008 | <i>Ethmostigmus rubripes epidermis</i> |
| 13 | GASJ01000007 | <i>Ethmostigmus rubripes epidermis</i> |
| 14 | JZ574149.1   | <i>Scolopendra viridis</i>             |

| <b>SLPTX2</b> |              |                              |
|---------------|--------------|------------------------------|
| 1             | GASI01000163 | <i>Ethmostigmus rubripes</i> |
| 2             | GASI01000164 | <i>Ethmostigmus rubripes</i> |
| 3             | GASI01000165 | <i>Ethmostigmus rubripes</i> |
| 4             | GASI01000166 | <i>Ethmostigmus rubripes</i> |
| 5             | GASI01000168 | <i>Ethmostigmus rubripes</i> |
| 6             | GASI01000167 | <i>Ethmostigmus rubripes</i> |

| <b>SLPTX4</b> |              |                                        |
|---------------|--------------|----------------------------------------|
| 1             | GASI01000185 | <i>Ethmostigmus rubripes</i>           |
| 2             | GASI01000186 | <i>Ethmostigmus rubripes</i>           |
| 3             | GASH01000177 | <i>Scolopendra morsitans</i>           |
| 4             | GASH01000178 | <i>Scolopendra morsitans</i>           |
| 5             | KC144415.1   | <i>Scolopendra subspinipes dehaani</i> |
| 6             | KC144052.1   | <i>Scolopendra subspinipes dehaani</i> |
| 7             | KC144303.1   | <i>Scolopendra subspinipes dehaani</i> |
| 8             | GASI01000187 | <i>Ethmostigmus rubripes</i>           |
| 9             | GASI01000188 | <i>Ethmostigmus rubripes</i>           |
| 10            | GASI01000189 | <i>Ethmostigmus rubripes</i>           |
| 11            | KF130724     | <i>Ethmostigmus rubripes</i>           |
| 12            | KF130728     | <i>Ethmostigmus rubripes</i>           |
| 13            | KF130727     | <i>Ethmostigmus rubripes</i>           |

**Table S3:** Sequences Analyzed

|    |          |                              |
|----|----------|------------------------------|
| 14 | KF130729 | <i>Ethmostigmus rubripes</i> |
| 15 | KF130726 | <i>Ethmostigmus rubripes</i> |
| 16 | KF130730 | <i>Ethmostigmus rubripes</i> |
| 17 | KF130733 | <i>Ethmostigmus rubripes</i> |
| 18 | KF130734 | <i>Ethmostigmus rubripes</i> |
| 20 | KF130731 | <i>Ethmostigmus rubripes</i> |

| <b>SLPTX5</b> |              |                                |
|---------------|--------------|--------------------------------|
| 1             | GASK01000050 | <i>Scolopendra alternans</i>   |
| 2             | GASIO1000194 | <i>Ethmostigmus rubripes</i>   |
| 3             | GASIO1000193 | <i>Ethmostigmus rubripes</i>   |
| 4             | GASH01000179 | <i>Scolopendra morsitans</i>   |
| 5             | GASIO1000190 | <i>Ethmostigmus rubripes</i>   |
| 6             | GASIO1000191 | <i>Ethmostigmus rubripes</i>   |
| 7             | GASIO1000192 | <i>Ethmostigmus rubripes</i>   |
| 8             | GASK01000051 | <i>Scolopendra alternans</i>   |
| 9             | GASL01000049 | <i>Cormocephalus westwoodi</i> |

| <b>SLPTX6</b> |              |                              |
|---------------|--------------|------------------------------|
| 1             | GASH01000180 | <i>Scolopendra morsitans</i> |
| 2             | GASH01000181 | <i>Scolopendra morsitans</i> |
| 3             | GASH01000182 | <i>Scolopendra morsitans</i> |
| 4             | GASH01000183 | <i>Scolopendra morsitans</i> |
| 5             | GASH01000184 | <i>Scolopendra morsitans</i> |
| 6             | GASH01000185 | <i>Scolopendra morsitans</i> |

| <b>SLPTX10</b> |              |                              |
|----------------|--------------|------------------------------|
| 1              | GASIO1000097 | <i>Ethmostigmus rubripes</i> |
| 2              | GASIO1000098 | <i>Ethmostigmus rubripes</i> |
| 3              | GASIO1000099 | <i>Ethmostigmus rubripes</i> |
| 4              | GASIO1000100 | <i>Ethmostigmus rubripes</i> |
| 5              | GASIO1000101 | <i>Ethmostigmus rubripes</i> |
| 6              | GASIO1000116 | <i>Ethmostigmus rubripes</i> |
| 7              | GASIO1000118 | <i>Ethmostigmus rubripes</i> |
| 8              | GASIO1000102 | <i>Ethmostigmus rubripes</i> |
| 9              | GASIO1000103 | <i>Ethmostigmus rubripes</i> |



**Table S3:** Sequences Analyzed

|    |              |                                |
|----|--------------|--------------------------------|
| 10 | GASI01000104 | <i>Ethmostigmus rubripes</i>   |
| 11 | GASI01000105 | <i>Ethmostigmus rubripes</i>   |
| 12 | GASI01000117 | <i>Ethmostigmus rubripes</i>   |
| 13 | GASI01000106 | <i>Ethmostigmus rubripes</i>   |
| 14 | GASI01000107 | <i>Ethmostigmus rubripes</i>   |
| 15 | GASI01000108 | <i>Ethmostigmus rubripes</i>   |
| 16 | GASI01000109 | <i>Ethmostigmus rubripes</i>   |
| 17 | GASI01000110 | <i>Ethmostigmus rubripes</i>   |
| 18 | GASI01000111 | <i>Ethmostigmus rubripes</i>   |
| 19 | GASI01000112 | <i>Ethmostigmus rubripes</i>   |
| 20 | GASI01000113 | <i>Ethmostigmus rubripes</i>   |
| 21 | GASI01000114 | <i>Ethmostigmus rubripes</i>   |
| 22 | GASI01000115 | <i>Ethmostigmus rubripes</i>   |
| 23 | GASH01000111 | <i>Scolopendra morsitans</i>   |
| 24 | GASH01000114 | <i>Scolopendra morsitans</i>   |
| 25 | GASH01000115 | <i>Scolopendra morsitans</i>   |
| 26 | GASH01000112 | <i>Scolopendra morsitans</i>   |
| 27 | GASH01000116 | <i>Scolopendra morsitans</i>   |
| 28 | GASH01000113 | <i>Scolopendra morsitans</i>   |
| 29 | GASH01000117 | <i>Scolopendra morsitans</i>   |
| 30 | GASH01000119 | <i>Scolopendra morsitans</i>   |
| 31 | GASH01000118 | <i>Scolopendra morsitans</i>   |
| 32 | GASK01000031 | <i>Scolopendra alternans</i>   |
| 33 | GASK01000033 | <i>Scolopendra alternans</i>   |
| 34 | GASK01000030 | <i>Scolopendra alternans</i>   |
| 35 | GASK01000032 | <i>Scolopendra alternans</i>   |
| 36 | GASK01000034 | <i>Scolopendra alternans</i>   |
| 37 | GASK01000035 | <i>Scolopendra alternans</i>   |
| 38 | GASH01000120 | <i>Scolopendra morsitans</i>   |
| 39 | GASL01000037 | <i>Cormocephalus westwoodi</i> |
| 40 | GASL01000038 | <i>Cormocephalus westwoodi</i> |
| 41 | GASL01000041 | <i>Cormocephalus westwoodi</i> |
| 42 | GASL01000039 | <i>Cormocephalus westwoodi</i> |
| 43 | GASL01000040 | <i>Cormocephalus westwoodi</i> |
| 44 | JZ574164.1   | <i>Scolopendra viridis</i>     |
| 45 | JZ574166.1   | <i>Scolopendra viridis</i>     |
| 46 | JZ574142.1   | <i>Scolopendra viridis</i>     |

**Table S3:** Sequences Analyzed

| <b>SLPTX11</b> |              |                                        |
|----------------|--------------|----------------------------------------|
| 1              | GASH01000124 | <i>Scolopendra morsitans</i>           |
| 2              | GASH01000121 | <i>Scolopendra morsitans</i>           |
| 3              | GASH01000123 | <i>Scolopendra morsitans</i>           |
| 4              | KC144430.1   | <i>Scolopendra subspinipes dehaani</i> |
| 5              | KC144839.1   | <i>Scolopendra subspinipes dehaani</i> |
| 6              | GASH01000128 | <i>Scolopendra morsitans</i>           |
| 7              | GASH01000133 | <i>Scolopendra morsitans</i>           |
| 8              | GASK01000037 | <i>Scolopendra alternans</i>           |
| 9              | GASH01000129 | <i>Scolopendra morsitans</i>           |
| 10             | GASH01000130 | <i>Scolopendra morsitans</i>           |
| 11             | GASH01000131 | <i>Scolopendra morsitans</i>           |
| 12             | GASH01000132 | <i>Scolopendra morsitans</i>           |
| 13             | GASH01000134 | <i>Scolopendra morsitans</i>           |
| 14             | GASK01000038 | <i>Scolopendra alternans</i>           |
| 15             | GASH01000135 | <i>Scolopendra morsitans</i>           |
| 16             | GASH01000125 | <i>Scolopendra morsitans</i>           |
| 17             | KC144200.1   | <i>Scolopendra subspinipes dehaani</i> |
| 18             | KC144173.1   | <i>Scolopendra subspinipes dehaani</i> |
| 19             | KC144172.1   | <i>Scolopendra subspinipes dehaani</i> |
| 20             | KC144023.1   | <i>Scolopendra subspinipes dehaani</i> |
| 21             | KC144075.1   | <i>Scolopendra subspinipes dehaani</i> |
| 22             | KC144647.1   | <i>Scolopendra subspinipes dehaani</i> |
| 23             | KC144505.1   | <i>Scolopendra subspinipes dehaani</i> |
| 24             | KC144104.1   | <i>Scolopendra subspinipes dehaani</i> |
| 25             | KC144090.1   | <i>Scolopendra subspinipes dehaani</i> |
| 26             | KC144802.1   | <i>Scolopendra subspinipes dehaani</i> |
| 27             | KC144483.1   | <i>Scolopendra subspinipes dehaani</i> |
| 28             | KC145102.1   | <i>Scolopendra subspinipes dehaani</i> |
| 29             | KC144335.1   | <i>Scolopendra subspinipes dehaani</i> |
| 30             | KC144251.1   | <i>Scolopendra subspinipes dehaani</i> |
| 31             | KC144193.1   | <i>Scolopendra subspinipes dehaani</i> |
| 32             | KC144442.1   | <i>Scolopendra subspinipes dehaani</i> |
| 33             | KC144919.1   | <i>Scolopendra subspinipes dehaani</i> |
| 34             | KC144828.1   | <i>Scolopendra subspinipes dehaani</i> |
| 35             | GASH01000127 | <i>Scolopendra morsitans</i>           |

**Table S3:** Sequences Analyzed

|    |              |                              |
|----|--------------|------------------------------|
| 36 | GASH01000126 | <i>Scolopendra morsitans</i> |
| 37 | GASH01000122 | <i>Scolopendra morsitans</i> |
| 38 | GASK01000036 | <i>Scolopendra alternans</i> |

| <b>SLPTX12</b> |              |                              |
|----------------|--------------|------------------------------|
| 1              | GASH01000136 | <i>Scolopendra morsitans</i> |
| 2              | GASH01000137 | <i>Scolopendra morsitans</i> |
| 3              | GASH01000138 | <i>Scolopendra morsitans</i> |
| 4              | GASH01000139 | <i>Scolopendra morsitans</i> |
| 5              | GASH01000140 | <i>Scolopendra morsitans</i> |
| 6              | GASH01000141 | <i>Scolopendra morsitans</i> |
| 7              | GASK01000039 | <i>Scolopendra alternans</i> |
| 8              | GASI01000119 | <i>Ethmostigmus rubripes</i> |
| 9              | GASI01000120 | <i>Ethmostigmus rubripes</i> |
| 10             | GASI01000121 | <i>Ethmostigmus rubripes</i> |

| <b>SLPTX13</b> |              |                                |
|----------------|--------------|--------------------------------|
| 1              | GASI01000122 | <i>Ethmostigmus rubripes</i>   |
| 2              | GASI01000123 | <i>Ethmostigmus rubripes</i>   |
| 3              | GASI01000124 | <i>Ethmostigmus rubripes</i>   |
| 4              | GASH01000142 | <i>Scolopendra morsitans</i>   |
| 5              | GASH01000143 | <i>Scolopendra morsitans</i>   |
| 6              | GASH01000144 | <i>Scolopendra morsitans</i>   |
| 7              | GASK01000040 | <i>Scolopendra alternans</i>   |
| 8              | GASL01000042 | <i>Cormocephalus westwoodi</i> |
| 9              | GASL01000043 | <i>Cormocephalus westwoodi</i> |

| <b>SLPTX14</b> |              |                              |
|----------------|--------------|------------------------------|
| 1              | GASH01000145 | <i>Scolopendra morsitans</i> |
| 2              | GASH01000146 | <i>Scolopendra morsitans</i> |
| 3              | GASH01000147 | <i>Scolopendra morsitans</i> |
| 4              | GASI01000125 | <i>Ethmostigmus rubripes</i> |
| 5              | GASK01000041 | <i>Scolopendra alternans</i> |

| <b>SLPTX15</b> |  |  |
|----------------|--|--|
|----------------|--|--|

**Table S3:** Sequences Analyzed

|    |              |                                        |
|----|--------------|----------------------------------------|
| 1  | GASH01000148 | <i>Scolopendra morsitans</i>           |
| 2  | GASH01000149 | <i>Scolopendra morsitans</i>           |
| 3  | GASH01000150 | <i>Scolopendra morsitans</i>           |
| 4  | GASH01000151 | <i>Scolopendra morsitans</i>           |
| 5  | KC144976.1   | <i>Scolopendra subspinipes dehaani</i> |
| 6  | KC144272.1   | <i>Scolopendra subspinipes dehaani</i> |
| 7  | KC144973.1   | <i>Scolopendra subspinipes dehaani</i> |
| 8  | GASH01000152 | <i>Scolopendra morsitans</i>           |
| 9  | GASH01000153 | <i>Scolopendra morsitans</i>           |
| 10 | GASH01000154 | <i>Scolopendra morsitans</i>           |
| 11 | GASK01000042 | <i>Scolopendra alternans</i>           |
| 12 | KC144115.1   | <i>Scolopendra subspinipes dehaani</i> |
| 13 | KC144793.1   | <i>Scolopendra subspinipes dehaani</i> |
| 14 | KC144364.1   | <i>Scolopendra subspinipes dehaani</i> |
| 15 | KC144588.1   | <i>Scolopendra subspinipes dehaani</i> |
| 16 | KC144400.1   | <i>Scolopendra subspinipes dehaani</i> |
| 17 | KC144464.1   | <i>Scolopendra subspinipes dehaani</i> |
| 18 | GASH01000155 | <i>Scolopendra morsitans</i>           |
| 19 | KC144101.1   | <i>Scolopendra subspinipes dehaani</i> |
| 20 | GASI01000126 | <i>Ethmostigmus rubripes</i>           |
| 21 | KC145039.1   | <i>Scolopendra subspinipes dehaani</i> |
| 22 | KC144953.1   | <i>Scolopendra subspinipes dehaani</i> |
| 23 | KC144826.1   | <i>Scolopendra subspinipes dehaani</i> |
| 24 | KC145003.1   | <i>Scolopendra subspinipes dehaani</i> |
| 25 | KC145006.1   | <i>Scolopendra subspinipes dehaani</i> |
| 26 | GASK01000043 | <i>Scolopendra alternans</i>           |
| 27 | GASK01000044 | <i>Scolopendra alternans</i>           |
| 28 | KC144556.1   | <i>Scolopendra subspinipes dehaani</i> |
| 29 | GASH01000156 | <i>Scolopendra morsitans</i>           |

| <b>SLPTX16</b> |              |                                        |
|----------------|--------------|----------------------------------------|
| 1              | KC144377.1   | <i>Scolopendra subspinipes dehaani</i> |
| 2              | GASI01000135 | <i>Ethmostigmus rubripes</i>           |
| 3              | GASI01000136 | <i>Ethmostigmus rubripes</i>           |
| 4              | GASI01000137 | <i>Ethmostigmus rubripes</i>           |
| 5              | GASI01000138 | <i>Ethmostigmus rubripes</i>           |
| 6              | GASI01000139 | <i>Ethmostigmus rubripes</i>           |

**Table S3:** Sequences Analyzed

|    |              |                                |
|----|--------------|--------------------------------|
| 7  | GASI01000140 | <i>Ethmostigmus rubripes</i>   |
| 8  | GASI01000141 | <i>Ethmostigmus rubripes</i>   |
| 9  | GASI01000142 | <i>Ethmostigmus rubripes</i>   |
| 10 | GASI01000143 | <i>Ethmostigmus rubripes</i>   |
| 11 | GASI01000134 | <i>Ethmostigmus rubripes</i>   |
| 12 | GASL01000045 | <i>Cormocephalus westwoodi</i> |
| 13 | GASH01000160 | <i>Scolopendra morsitans</i>   |
| 14 | GASH01000161 | <i>Scolopendra morsitans</i>   |
| 15 | GASH01000162 | <i>Scolopendra morsitans</i>   |
| 16 | GASI01000144 | <i>Ethmostigmus rubripes</i>   |
| 17 | GASI01000145 | <i>Ethmostigmus rubripes</i>   |
| 18 | GASI01000146 | <i>Ethmostigmus rubripes</i>   |
| 19 | GASI01000147 | <i>Ethmostigmus rubripes</i>   |
| 20 | GASI01000151 | <i>Ethmostigmus rubripes</i>   |
| 21 | GASI01000152 | <i>Ethmostigmus rubripes</i>   |
| 22 | GASI01000154 | <i>Ethmostigmus rubripes</i>   |
| 23 | GASI01000148 | <i>Ethmostigmus rubripes</i>   |
| 24 | GASI01000149 | <i>Ethmostigmus rubripes</i>   |
| 25 | GASI01000150 | <i>Ethmostigmus rubripes</i>   |
| 26 | GASI01000153 | <i>Ethmostigmus rubripes</i>   |
| 27 | GASI01000155 | <i>Ethmostigmus rubripes</i>   |
| 28 | GASH01000163 | <i>Scolopendra morsitans</i>   |
| 29 | GASH01000164 | <i>Scolopendra morsitans</i>   |
| 30 | GASH01000165 | <i>Scolopendra morsitans</i>   |
| 31 | GASI01000127 | <i>Ethmostigmus rubripes</i>   |
| 32 | GASI01000128 | <i>Ethmostigmus rubripes</i>   |
| 33 | GASH01000166 | <i>Scolopendra morsitans</i>   |
| 34 | GASH01000167 | <i>Scolopendra morsitans</i>   |
| 35 | GASK01000045 | <i>Scolopendra alternans</i>   |
| 36 | GASI01000129 | <i>Ethmostigmus rubripes</i>   |
| 37 | GASI01000130 | <i>Ethmostigmus rubripes</i>   |
| 38 | GASI01000131 | <i>Ethmostigmus rubripes</i>   |
| 39 | GASI01000132 | <i>Ethmostigmus rubripes</i>   |
| 40 | GASI01000133 | <i>Ethmostigmus rubripes</i>   |
| 41 | GASH01000168 | <i>Scolopendra morsitans</i>   |
| 42 | SMAR012379   | <i>Strigamia maritima</i>      |
| 43 | SMAR009096   | <i>Strigamia maritima</i>      |

**Table S3: Sequences Analyzed**

|    |            |                           |
|----|------------|---------------------------|
| 44 | SMAR009097 | <i>Strigamia maritima</i> |
|----|------------|---------------------------|

| <b>SLPTX17</b> |              |                                        |
|----------------|--------------|----------------------------------------|
| 1              | GASI01000156 | <i>Ethmostigmus rubripes</i>           |
| 2              | GASI01000157 | <i>Ethmostigmus rubripes</i>           |
| 3              | GASI01000158 | <i>Ethmostigmus rubripes</i>           |
| 4              | GASI01000159 | <i>Ethmostigmus rubripes</i>           |
| 5              | GASI01000160 | <i>Ethmostigmus rubripes</i>           |
| 6              | GASJ01000003 | <i>Ethmostigmus rubripes epidermis</i> |
| 7              | GASJ01000004 | <i>Ethmostigmus rubripes epidermis</i> |
| 8              | GASI01000161 | <i>Ethmostigmus rubripes</i>           |
| 9              | GASI01000162 | <i>Ethmostigmus rubripes</i>           |
| 10             | JZ574151.1   | <i>Scolopendra viridis</i>             |

| <b>SLPTX24</b> |              |                              |
|----------------|--------------|------------------------------|
| 1              | GASI01000177 | <i>Ethmostigmus rubripes</i> |
| 2              | GASI01000178 | <i>Ethmostigmus rubripes</i> |
| 3              | GASI01000179 | <i>Ethmostigmus rubripes</i> |
| 4              | GASI01000180 | <i>Ethmostigmus rubripes</i> |
| 5              | GASI01000181 | <i>Ethmostigmus rubripes</i> |

## Spiders

| <b>Phospholipase D</b> |          |                             |
|------------------------|----------|-----------------------------|
| 1                      | AY699703 | <i>Loxosceles arizonica</i> |
| 2                      | AY699704 | <i>Loxosceles arizonica</i> |
| 3                      | KM884812 | <i>Loxosceles arizonica</i> |
| 4                      | AY559846 | <i>Loxosceles reclusa</i>   |
| 5                      | AY559847 | <i>Loxosceles reclusa</i>   |
| 6                      | AY862486 | <i>Loxosceles reclusa</i>   |
| 7                      | FJ171486 | <i>Loxosceles spinulosa</i> |
| 8                      | FJ171454 | <i>Loxosceles amazonica</i> |
| 9                      | FJ171455 | <i>Loxosceles amazonica</i> |
| 10                     | FJ171378 | <i>Loxosceles apachea</i>   |
| 11                     | AY559844 | <i>Loxosceles boneti</i>    |
| 12                     | AY559845 | <i>Loxosceles boneti</i>    |

**Table S3:** Sequences Analyzed

|    |            |                              |
|----|------------|------------------------------|
| 13 | FJ171475   | <i>Loxosceles spinulosa</i>  |
| 14 | FJ171407   | <i>Loxosceles deserta</i>    |
| 15 | FJ171408   | <i>Loxosceles deserta</i>    |
| 16 | FJ171409   | <i>Loxosceles deserta</i>    |
| 17 | FJ171410   | <i>Loxosceles deserta</i>    |
| 18 | FJ171411   | <i>Loxosceles deserta</i>    |
| 19 | FJ171412   | <i>Loxosceles deserta</i>    |
| 20 | FJ171413   | <i>Loxosceles deserta</i>    |
| 21 | FJ171414   | <i>Loxosceles deserta</i>    |
| 22 | FJ171415   | <i>Loxosceles deserta</i>    |
| 23 | AY974250   | <i>Loxosceles gaucho</i>     |
| 24 | JX866729   | <i>Loxosceles gaucho</i>     |
| 25 | FJ171369   | <i>Loxosceles hirsuta</i>    |
| 26 | FJ171370   | <i>Loxosceles hirsuta</i>    |
| 27 | FJ171371   | <i>Loxosceles hirsuta</i>    |
| 28 | FJ171372   | <i>Loxosceles hirsuta</i>    |
| 29 | FJ171373   | <i>Loxosceles hirsuta</i>    |
| 30 | AY340702   | <i>Loxosceles intermedia</i> |
| 31 | AY304471.2 | <i>Loxosceles intermedia</i> |
| 32 | AY304472.2 | <i>Loxosceles intermedia</i> |
| 33 | DQ218155   | <i>Loxosceles intermedia</i> |
| 34 | DQ266399   | <i>Loxosceles intermedia</i> |
| 35 | DQ267927   | <i>Loxosceles intermedia</i> |
| 36 | DQ388596   | <i>Loxosceles intermedia</i> |
| 37 | DQ388597   | <i>Loxosceles intermedia</i> |
| 38 | DQ431848   | <i>Loxosceles intermedia</i> |
| 39 | DQ431849   | <i>Loxosceles intermedia</i> |
| 40 | EF474482   | <i>Loxosceles intermedia</i> |
| 41 | EF535250   | <i>Loxosceles intermedia</i> |
| 42 | EF535251   | <i>Loxosceles intermedia</i> |
| 43 | EF535252   | <i>Loxosceles intermedia</i> |
| 44 | EF535253   | <i>Loxosceles intermedia</i> |
| 45 | EF535255   | <i>Loxosceles intermedia</i> |
| 46 | EF535256   | <i>Loxosceles intermedia</i> |
| 47 | KC237286   | <i>Loxosceles intermedia</i> |
| 48 | AY093601   | <i>Loxosceles laeta</i>      |
| 49 | FJ171435   | <i>Loxosceles rufescens</i>  |

**Table S3:** Sequences Analyzed

|    |          |                              |
|----|----------|------------------------------|
| 50 | AY929305 | <i>Loxosceles similis</i>    |
| 51 | FJ171361 | <i>Loxosceles spadicea</i>   |
| 52 | FJ171362 | <i>Loxosceles spadicea</i>   |
| 53 | FJ171363 | <i>Loxosceles spadicea</i>   |
| 54 | FJ171365 | <i>Loxosceles spadicea</i>   |
| 55 | FJ171366 | <i>Loxosceles spadicea</i>   |
| 56 | FJ171367 | <i>Loxosceles spadicea</i>   |
| 57 | FJ171374 | <i>Loxosceles spadicea</i>   |
| 58 | FJ171375 | <i>Loxosceles spadicea</i>   |
| 59 | FJ171484 | <i>Loxosceles spinulosa</i>  |
| 60 | FJ171485 | <i>Loxosceles spinulosa</i>  |
| 61 | FJ171527 | <i>Loxosceles spinulosa</i>  |
| 62 | FJ171529 | <i>Loxosceles spinulosa</i>  |
| 63 | FJ171526 | <i>Sicarius albospinosus</i> |
| 64 | FJ171490 | <i>Sicarius damarensis</i>   |
| 65 | FJ171506 | <i>Sicarius damarensis</i>   |
| 66 | FJ171507 | <i>Sicarius damarensis</i>   |
| 67 | FJ171511 | <i>Sicarius damarensis</i>   |
| 68 | FJ171512 | <i>Sicarius damarensis</i>   |
| 69 | FJ171514 | <i>Sicarius damarensis</i>   |
| 70 | FJ171515 | <i>Sicarius damarensis</i>   |
| 71 | FJ171516 | <i>Sicarius damarensis</i>   |
| 72 | FJ171517 | <i>Sicarius damarensis</i>   |
| 73 | FJ171522 | <i>Sicarius damarensis</i>   |
| 74 | FJ171524 | <i>Sicarius damarensis</i>   |
| 75 | FJ171525 | <i>Sicarius damarensis</i>   |
| 76 | FJ171487 | <i>Sicarius patagonicus</i>  |
| 77 | FJ171503 | <i>Sicarius patagonicus</i>  |
| 78 | FJ171504 | <i>Sicarius patagonicus</i>  |
| 79 | FJ171505 | <i>Sicarius patagonicus</i>  |
| 80 | FJ171468 | <i>Sicarius peruensis</i>    |
| 81 | FJ171469 | <i>Sicarius peruensis</i>    |
| 82 | FJ171470 | <i>Sicarius peruensis</i>    |
| 83 | FJ171471 | <i>Sicarius peruensis</i>    |
| 84 | FJ171472 | <i>Sicarius peruensis</i>    |
| 85 | FJ171473 | <i>Sicarius peruensis</i>    |
| 86 | FJ171488 | <i>Sicarius peruensis</i>    |



**Table S3:** Sequences Analyzed

|     |          |                           |
|-----|----------|---------------------------|
| 87  | FJ171491 | <i>Sicarius peruensis</i> |
| 88  | FJ171492 | <i>Sicarius peruensis</i> |
| 89  | FJ171493 | <i>Sicarius peruensis</i> |
| 90  | FJ171494 | <i>Sicarius peruensis</i> |
| 91  | FJ171495 | <i>Sicarius peruensis</i> |
| 92  | FJ171496 | <i>Sicarius peruensis</i> |
| 93  | FJ171497 | <i>Sicarius peruensis</i> |
| 94  | FJ171498 | <i>Sicarius peruensis</i> |
| 95  | FJ171499 | <i>Sicarius peruensis</i> |
| 96  | FJ171500 | <i>Sicarius peruensis</i> |
| 97  | FJ171501 | <i>Sicarius peruensis</i> |
| 98  | FJ171474 | <i>Sicarius terrosus</i>  |
| 99  | FJ171489 | <i>Sicarius terrosus</i>  |
| 100 | KM884813 | <i>Sicarius terrosus</i>  |

| <b>Huwentoxin-family 1</b> |            |                              |
|----------------------------|------------|------------------------------|
| 1                          | AF157504.1 | <i>Ornithoctonus huwena</i>  |
| 2                          | AY263711.1 | <i>Ornithoctonus huwena</i>  |
| 3                          | EU195252.1 | <i>Ornithoctonus huwena</i>  |
| 4                          | EU195253.1 | <i>Ornithoctonus huwena</i>  |
| 5                          | EU195254.1 | <i>Ornithoctonus huwena</i>  |
| 6                          | EU195255.1 | <i>Ornithoctonus huwena</i>  |
| 7                          | EU195256.1 | <i>Ornithoctonus huwena</i>  |
| 8                          | EU195257.1 | <i>Ornithoctonus huwena</i>  |
| 9                          | EU195258.1 | <i>Ornithoctonus huwena</i>  |
| 10                         | EU195259.1 | <i>Ornithoctonus huwena</i>  |
| 11                         | EU195260.1 | <i>Ornithoctonus huwena</i>  |
| 12                         | EU195261.1 | <i>Ornithoctonus huwena</i>  |
| 13                         | EU195262.1 | <i>Ornithoctonus huwena</i>  |
| 14                         | EU195263.1 | <i>Ornithoctonus huwena</i>  |
| 15                         | GU293008.1 | <i>Ornithoctonus hainana</i> |
| 16                         | GU293009.1 | <i>Ornithoctonus hainana</i> |
| 17                         | GU293010.1 | <i>Ornithoctonus hainana</i> |
| 18                         | GU293060.1 | <i>Ornithoctonus hainana</i> |
| 19                         | GU293061.1 | <i>Ornithoctonus hainana</i> |
| 20                         | GU293062.1 | <i>Ornithoctonus hainana</i> |
| 21                         | GU293063.1 | <i>Ornithoctonus hainana</i> |

**Table S3:** Sequences Analyzed

|    |            |                              |
|----|------------|------------------------------|
| 22 | GU292856.1 | <i>Ornithoctonus hainana</i> |
| 23 | GU292857.1 | <i>Ornithoctonus hainana</i> |
| 24 | GU292858.1 | <i>Ornithoctonus hainana</i> |
| 25 | GU292859.1 | <i>Ornithoctonus hainana</i> |
| 26 | GU292860.1 | <i>Ornithoctonus hainana</i> |
| 27 | GU292861.1 | <i>Ornithoctonus hainana</i> |
| 28 | GU292862.1 | <i>Ornithoctonus hainana</i> |
| 29 | GU292863.1 | <i>Ornithoctonus hainana</i> |
| 30 | GU292864.1 | <i>Ornithoctonus hainana</i> |
| 31 | GU292865.1 | <i>Ornithoctonus hainana</i> |
| 32 | GU292866.1 | <i>Ornithoctonus hainana</i> |
| 33 | GU292867.1 | <i>Ornithoctonus hainana</i> |
| 34 | GU292868.1 | <i>Ornithoctonus hainana</i> |
| 35 | GU292869.1 | <i>Ornithoctonus hainana</i> |
| 36 | GU292870.1 | <i>Ornithoctonus hainana</i> |
| 37 | GU292871.1 | <i>Ornithoctonus hainana</i> |
| 38 | GU292872.1 | <i>Ornithoctonus hainana</i> |
| 39 | GU292873.1 | <i>Ornithoctonus hainana</i> |
| 40 | GU292874.1 | <i>Ornithoctonus hainana</i> |
| 41 | GU292875.1 | <i>Ornithoctonus hainana</i> |
| 42 | GU292876.1 | <i>Ornithoctonus hainana</i> |
| 43 | GU292877.1 | <i>Ornithoctonus hainana</i> |
| 44 | GU292878.1 | <i>Ornithoctonus hainana</i> |
| 45 | GU292879.1 | <i>Ornithoctonus hainana</i> |
| 46 | GU292880.1 | <i>Ornithoctonus hainana</i> |
| 47 | AJ854060.1 | <i>Chilobrachys jingzhao</i> |
| 48 | EU233831.1 | <i>Chilobrachys jingzhao</i> |
| 49 | EU233832.1 | <i>Chilobrachys jingzhao</i> |
| 50 | EU233833.1 | <i>Chilobrachys jingzhao</i> |
| 51 | EU233834.1 | <i>Chilobrachys jingzhao</i> |
| 52 | EU233835.1 | <i>Chilobrachys jingzhao</i> |
| 53 | EU233848.1 | <i>Chilobrachys jingzhao</i> |
| 54 | EU233849.1 | <i>Chilobrachys jingzhao</i> |
| 55 | EU233850.1 | <i>Chilobrachys jingzhao</i> |
| 56 | EU233851.1 | <i>Chilobrachys jingzhao</i> |
| 57 | EU233852.1 | <i>Chilobrachys jingzhao</i> |
| 58 | EU233853.1 | <i>Chilobrachys jingzhao</i> |

**Table S3:** Sequences Analyzed

|    |            |                              |
|----|------------|------------------------------|
| 59 | EU233855.1 | <i>Chilobrachys jingzhao</i> |
| 60 | EU233856.1 | <i>Chilobrachys jingzhao</i> |
| 61 | EU233857.1 | <i>Chilobrachys jingzhao</i> |
| 62 | EU233858.1 | <i>Chilobrachys jingzhao</i> |
| 63 | EU233859.1 | <i>Chilobrachys jingzhao</i> |
| 64 | EU233860.1 | <i>Chilobrachys jingzhao</i> |
| 65 | EU233861.1 | <i>Chilobrachys jingzhao</i> |
| 66 | EU233863.1 | <i>Chilobrachys jingzhao</i> |
| 67 | EU233864.1 | <i>Chilobrachys jingzhao</i> |
| 68 | EU233865.1 | <i>Chilobrachys jingzhao</i> |
| 69 | EU233866.1 | <i>Chilobrachys jingzhao</i> |
| 70 | EU233867.1 | <i>Chilobrachys jingzhao</i> |
| 71 | EU233868.1 | <i>Chilobrachys jingzhao</i> |
| 72 | EU233869.1 | <i>Chilobrachys jingzhao</i> |
| 73 | EU233870.1 | <i>Chilobrachys jingzhao</i> |
| 74 | EU233871.1 | <i>Chilobrachys jingzhao</i> |
| 75 | EU233872.1 | <i>Chilobrachys jingzhao</i> |
| 76 | EU233874.1 | <i>Chilobrachys jingzhao</i> |
| 77 | EU233875.1 | <i>Chilobrachys jingzhao</i> |
| 78 | EU233876.1 | <i>Chilobrachys jingzhao</i> |
| 79 | EU233877.1 | <i>Chilobrachys jingzhao</i> |
| 80 | EU233878.1 | <i>Chilobrachys jingzhao</i> |
| 81 | EU233879.1 | <i>Chilobrachys jingzhao</i> |
| 82 | EU233880.1 | <i>Chilobrachys jingzhao</i> |
| 83 | EU233881.1 | <i>Chilobrachys jingzhao</i> |
| 84 | EU233882.1 | <i>Chilobrachys jingzhao</i> |
| 85 | EU233883.1 | <i>Chilobrachys jingzhao</i> |
| 86 | EU233884.1 | <i>Chilobrachys jingzhao</i> |
| 87 | EU233885.1 | <i>Chilobrachys jingzhao</i> |
| 88 | EU233886.1 | <i>Chilobrachys jingzhao</i> |
| 89 | EU233887.1 | <i>Chilobrachys jingzhao</i> |
| 90 | EU233888.1 | <i>Chilobrachys jingzhao</i> |
| 91 | EU233889.1 | <i>Chilobrachys jingzhao</i> |
| 92 | EU233890.1 | <i>Chilobrachys jingzhao</i> |
| 93 | EU233891.1 | <i>Chilobrachys jingzhao</i> |
| 94 | EU233892.1 | <i>Chilobrachys jingzhao</i> |
| 95 | EU233893.1 | <i>Chilobrachys jingzhao</i> |

**Table S3:** Sequences Analyzed

|     |            |                              |
|-----|------------|------------------------------|
| 96  | EU233894.1 | <i>Chilobrachys jingzhao</i> |
| 97  | EU233895.1 | <i>Chilobrachys jingzhao</i> |
| 98  | EU233896.1 | <i>Chilobrachys jingzhao</i> |
| 99  | EU233897.1 | <i>Chilobrachys jingzhao</i> |
| 100 | EU233898.1 | <i>Chilobrachys jingzhao</i> |
| 101 | EU233899.1 | <i>Chilobrachys jingzhao</i> |
| 102 | EU233900.1 | <i>Chilobrachys jingzhao</i> |
| 103 | EU233901.1 | <i>Chilobrachys jingzhao</i> |
| 104 | EU233902.1 | <i>Chilobrachys jingzhao</i> |
| 105 | EU233903.1 | <i>Chilobrachys jingzhao</i> |
| 106 | EU233910.1 | <i>Chilobrachys jingzhao</i> |
| 107 | AY263707.1 | <i>Ornithoctonus huwena</i>  |
| 108 | AY263708.1 | <i>Ornithoctonus huwena</i>  |
| 109 | EU195264.1 | <i>Ornithoctonus huwena</i>  |
| 110 | EU195265.1 | <i>Ornithoctonus huwena</i>  |
| 111 | EU195266.1 | <i>Ornithoctonus huwena</i>  |
| 112 | EU195267.1 | <i>Ornithoctonus huwena</i>  |
| 113 | EU195268.1 | <i>Ornithoctonus huwena</i>  |
| 114 | EU195269.1 | <i>Ornithoctonus huwena</i>  |
| 115 | EU195270.1 | <i>Ornithoctonus huwena</i>  |
| 116 | EU195271.1 | <i>Ornithoctonus huwena</i>  |
| 117 | EU195291.1 | <i>Ornithoctonus huwena</i>  |
| 118 | EU195292.1 | <i>Ornithoctonus huwena</i>  |
| 119 | EU195293.1 | <i>Ornithoctonus huwena</i>  |
| 120 | HM015001.1 | <i>Ornithoctonus huwena</i>  |
| 121 | AY316118.1 | <i>Grammostola rosea</i>     |
| 122 | AB612243.1 | <i>Grammostola rosea</i>     |
| 123 | GU293014.1 | <i>Ornithoctonus hainana</i> |
| 124 | GU293025.1 | <i>Ornithoctonus hainana</i> |
| 125 | GU293026.1 | <i>Ornithoctonus hainana</i> |
| 126 | GU293027.1 | <i>Ornithoctonus hainana</i> |
| 127 | GU293028.1 | <i>Ornithoctonus hainana</i> |
| 128 | GU293040.1 | <i>Ornithoctonus hainana</i> |
| 129 | GU293041.1 | <i>Ornithoctonus hainana</i> |
| 130 | GU293042.1 | <i>Ornithoctonus hainana</i> |
| 131 | GU293043.1 | <i>Ornithoctonus hainana</i> |
| 132 | GU293044.1 | <i>Ornithoctonus hainana</i> |

**Table S3:** Sequences Analyzed

|     |            |                              |
|-----|------------|------------------------------|
| 133 | GU293045.1 | <i>Ornithoctonus hainana</i> |
| 134 | GU293046.1 | <i>Ornithoctonus hainana</i> |
| 135 | GU293050.1 | <i>Ornithoctonus hainana</i> |
| 136 | GU293051.1 | <i>Ornithoctonus hainana</i> |
| 137 | GU293052.1 | <i>Ornithoctonus hainana</i> |
| 138 | GU293053.1 | <i>Ornithoctonus hainana</i> |
| 139 | GU293054.1 | <i>Ornithoctonus hainana</i> |
| 140 | GU293055.1 | <i>Ornithoctonus hainana</i> |
| 141 | GU293091.1 | <i>Ornithoctonus hainana</i> |
| 142 | GU293092.1 | <i>Ornithoctonus hainana</i> |
| 143 | GU293093.1 | <i>Ornithoctonus hainana</i> |
| 144 | GU293094.1 | <i>Ornithoctonus hainana</i> |
| 145 | GU293095.1 | <i>Ornithoctonus hainana</i> |
| 146 | GU293096.1 | <i>Ornithoctonus hainana</i> |
| 147 | GU293097.1 | <i>Ornithoctonus hainana</i> |
| 148 | GU293098.1 | <i>Ornithoctonus hainana</i> |
| 149 | GU293099.1 | <i>Ornithoctonus hainana</i> |
| 150 | GU293100.1 | <i>Ornithoctonus hainana</i> |
| 151 | GU293101.1 | <i>Ornithoctonus hainana</i> |
| 152 | GU293102.1 | <i>Ornithoctonus hainana</i> |
| 153 | GU293103.1 | <i>Ornithoctonus hainana</i> |
| 154 | GU293104.1 | <i>Ornithoctonus hainana</i> |
| 155 | GU293105.1 | <i>Ornithoctonus hainana</i> |
| 156 | GU293106.1 | <i>Ornithoctonus hainana</i> |
| 157 | GU293107.1 | <i>Ornithoctonus hainana</i> |
| 158 | GU293108.1 | <i>Ornithoctonus hainana</i> |
| 159 | GU293109.1 | <i>Ornithoctonus hainana</i> |
| 160 | GU293110.1 | <i>Ornithoctonus hainana</i> |
| 161 | GU293111.1 | <i>Ornithoctonus hainana</i> |
| 162 | GU293112.1 | <i>Ornithoctonus hainana</i> |
| 163 | GU293113.1 | <i>Ornithoctonus hainana</i> |
| 164 | GU293114.1 | <i>Ornithoctonus hainana</i> |
| 165 | GU292853.1 | <i>Ornithoctonus hainana</i> |
| 166 | GU292854.1 | <i>Ornithoctonus hainana</i> |
| 167 | GU292855.1 | <i>Ornithoctonus hainana</i> |
| 168 | GU292909.1 | <i>Ornithoctonus hainana</i> |
| 169 | GU292910.1 | <i>Ornithoctonus hainana</i> |

**Table S3:** Sequences Analyzed

|     |            |                              |
|-----|------------|------------------------------|
| 170 | GU292911.1 | <i>Ornithoctonus hainana</i> |
| 171 | GU292912.1 | <i>Ornithoctonus hainana</i> |
| 172 | GU292913.1 | <i>Ornithoctonus hainana</i> |
| 173 | GU292914.1 | <i>Ornithoctonus hainana</i> |
| 174 | GU292915.1 | <i>Ornithoctonus hainana</i> |
| 175 | GU292916.1 | <i>Ornithoctonus hainana</i> |
| 176 | GU292917.1 | <i>Ornithoctonus hainana</i> |
| 177 | GU292918.1 | <i>Ornithoctonus hainana</i> |
| 178 | GU292919.1 | <i>Ornithoctonus hainana</i> |
| 179 | GU292920.1 | <i>Ornithoctonus hainana</i> |
| 180 | GU292921.1 | <i>Ornithoctonus hainana</i> |
| 181 | GU292922.1 | <i>Ornithoctonus hainana</i> |
| 182 | GU292923.1 | <i>Ornithoctonus hainana</i> |
| 183 | GU292924.1 | <i>Ornithoctonus hainana</i> |
| 184 | GU292925.1 | <i>Ornithoctonus hainana</i> |
| 185 | GU292926.1 | <i>Ornithoctonus hainana</i> |
| 186 | GU292927.1 | <i>Ornithoctonus hainana</i> |
| 187 | GU292977.1 | <i>Ornithoctonus hainana</i> |
| 188 | GU292978.1 | <i>Ornithoctonus hainana</i> |
| 189 | GU292979.1 | <i>Ornithoctonus hainana</i> |
| 190 | GU292980.1 | <i>Ornithoctonus hainana</i> |
| 191 | GU292981.1 | <i>Ornithoctonus hainana</i> |
| 192 | GU292982.1 | <i>Ornithoctonus hainana</i> |
| 193 | GU292983.1 | <i>Ornithoctonus hainana</i> |
| 194 | GU292984.1 | <i>Ornithoctonus hainana</i> |
| 195 | GU292985.1 | <i>Ornithoctonus hainana</i> |
| 196 | GU292986.1 | <i>Ornithoctonus hainana</i> |
| 197 | GU292987.1 | <i>Ornithoctonus hainana</i> |
| 198 | GU292988.1 | <i>Ornithoctonus hainana</i> |
| 199 | GU292989.1 | <i>Ornithoctonus hainana</i> |
| 200 | GU292990.1 | <i>Ornithoctonus hainana</i> |
| 201 | GU292991.1 | <i>Ornithoctonus hainana</i> |
| 202 | GU292992.1 | <i>Ornithoctonus hainana</i> |
| 203 | GU292998.1 | <i>Ornithoctonus hainana</i> |
| 204 | GU293000.1 | <i>Ornithoctonus hainana</i> |

**Kunitz Protease inhibitor**

**Table S3:** Sequences Analyzed

|    |          |                             |
|----|----------|-----------------------------|
| 1  | EU195290 | <i>Ornithoctonus huwena</i> |
| 2  | EU635744 | <i>Ornithoctonus huwena</i> |
| 3  | EU635745 | <i>Ornithoctonus huwena</i> |
| 4  | EU635746 | <i>Ornithoctonus huwena</i> |
| 5  | EU635747 | <i>Ornithoctonus huwena</i> |
| 6  | EU635748 | <i>Ornithoctonus huwena</i> |
| 7  | KF160294 | <i>Haplopelma schmidti</i>  |
| 8  | KF160295 | <i>Haplopelma schmidti</i>  |
| 9  | KF160296 | <i>Haplopelma schmidti</i>  |
| 10 | KF160297 | <i>Haplopelma schmidti</i>  |
| 11 | KF160298 | <i>Haplopelma schmidti</i>  |
| 12 | KF160299 | <i>Haplopelma schmidti</i>  |
| 13 | KF160300 | <i>Haplopelma schmidti</i>  |
| 15 | KF160302 | <i>Haplopelma schmidti</i>  |
| 16 | KF160303 | <i>Haplopelma schmidti</i>  |
| 17 | KF160304 | <i>Haplopelma schmidti</i>  |
| 18 | KF160305 | <i>Haplopelma schmidti</i>  |
| 19 | KF160306 | <i>Haplopelma schmidti</i>  |
| 20 | KF160307 | <i>Haplopelma schmidti</i>  |
| 21 | KF160308 | <i>Haplopelma schmidti</i>  |
| 22 | KF160309 | <i>Haplopelma schmidti</i>  |
| 23 | KF160310 | <i>Haplopelma schmidti</i>  |
| 24 | KF160311 | <i>Haplopelma schmidti</i>  |
| 25 | KF160312 | <i>Haplopelma schmidti</i>  |
| 26 | KF160313 | <i>Haplopelma schmidti</i>  |
| 27 | KF160314 | <i>Haplopelma schmidti</i>  |
| 29 | KF160316 | <i>Haplopelma schmidti</i>  |
| 30 | KF160317 | <i>Haplopelma schmidti</i>  |
| 31 | KF160318 | <i>Haplopelma schmidti</i>  |
| 32 | KF160319 | <i>Haplopelma schmidti</i>  |
| 33 | KF160320 | <i>Haplopelma schmidti</i>  |
| 34 | KF160321 | <i>Haplopelma schmidti</i>  |
| 36 | KF160323 | <i>Haplopelma schmidti</i>  |
| 37 | KF160324 | <i>Haplopelma schmidti</i>  |
| 38 | KF160325 | <i>Haplopelma schmidti</i>  |
| 39 | KF160326 | <i>Haplopelma schmidti</i>  |
| 40 | KF160327 | <i>Haplopelma schmidti</i>  |

**Table S3:** Sequences Analyzed

|    |          |                              |
|----|----------|------------------------------|
| 41 | KF160328 | <i>Haplopelma schmidti</i>   |
| 42 | KF160329 | <i>Haplopelma schmidti</i>   |
| 43 | KF160330 | <i>Haplopelma schmidti</i>   |
| 44 | GU293030 | <i>Ornithoctonus hainana</i> |
| 45 | GU293031 | <i>Ornithoctonus hainana</i> |
| 46 | GU293032 | <i>Ornithoctonus hainana</i> |
| 47 | GU293033 | <i>Ornithoctonus hainana</i> |
| 48 | GU293034 | <i>Ornithoctonus hainana</i> |
| 49 | GU293035 | <i>Ornithoctonus hainana</i> |
| 50 | GU293036 | <i>Ornithoctonus hainana</i> |
| 51 | GU293037 | <i>Ornithoctonus hainana</i> |
| 52 | GU293038 | <i>Ornithoctonus hainana</i> |
| 53 | GU293039 | <i>Ornithoctonus hainana</i> |
| 54 | GU293128 | <i>Ornithoctonus hainana</i> |
| 55 | GU293129 | <i>Ornithoctonus hainana</i> |
| 56 | GU293130 | <i>Ornithoctonus hainana</i> |
| 57 | GU293131 | <i>Ornithoctonus hainana</i> |
| 58 | GU293132 | <i>Ornithoctonus hainana</i> |
| 59 | GU293133 | <i>Ornithoctonus hainana</i> |
| 60 | GU293134 | <i>Ornithoctonus hainana</i> |
| 61 | GU293135 | <i>Ornithoctonus hainana</i> |
| 62 | GU293136 | <i>Ornithoctonus hainana</i> |
| 63 | GU292999 | <i>Ornithoctonus hainana</i> |

| <b>Magi-1 family</b> |            |                              |
|----------------------|------------|------------------------------|
| 1                    | EU196048.1 | <i>Brachypelma smithi</i>    |
| 2                    | EU233907.1 | <i>Chilobrachys jingzhao</i> |
| 3                    | EU233908.1 | <i>Chilobrachys jingzhao</i> |
| 4                    | EU195239.1 | <i>Ornithoctonus huwena</i>  |
| 5                    | EU195240.1 | <i>Ornithoctonus huwena</i>  |
| 6                    | EU195241.1 | <i>Ornithoctonus huwena</i>  |
| 7                    | EU195242.1 | <i>Ornithoctonus huwena</i>  |
| 8                    | EU195243.1 | <i>Ornithoctonus huwena</i>  |
| 9                    | EU195244.1 | <i>Ornithoctonus huwena</i>  |
| 10                   | EU195245.1 | <i>Ornithoctonus huwena</i>  |
| 11                   | EU195246.1 | <i>Ornithoctonus huwena</i>  |
| 12                   | EU195247.1 | <i>Ornithoctonus huwena</i>  |



**Table S3:** Sequences Analyzed

|    |            |                              |
|----|------------|------------------------------|
| 13 | EU195248.1 | <i>Ornithoctonus huwena</i>  |
| 14 | EU195249.1 | <i>Ornithoctonus huwena</i>  |
| 15 | EU195250.1 | <i>Ornithoctonus huwena</i>  |
| 16 | EU195251.1 | <i>Ornithoctonus huwena</i>  |
| 17 | GU293056.1 | <i>Ornithoctonus hainana</i> |
| 18 | GU293057.1 | <i>Ornithoctonus hainana</i> |
| 19 | GU293058.1 | <i>Ornithoctonus hainana</i> |
| 20 | GU293059.1 | <i>Ornithoctonus hainana</i> |
| 21 | GU293120.1 | <i>Ornithoctonus hainana</i> |
| 22 | GU293121.1 | <i>Ornithoctonus hainana</i> |
| 23 | GU293122.1 | <i>Ornithoctonus hainana</i> |
| 24 | GU293123.1 | <i>Ornithoctonus hainana</i> |
| 25 | GU293124.1 | <i>Ornithoctonus hainana</i> |
| 26 | GU293125.1 | <i>Ornithoctonus hainana</i> |
| 27 | GU293126.1 | <i>Ornithoctonus hainana</i> |
| 28 | GU292930.1 | <i>Ornithoctonus hainana</i> |
| 29 | GU292931.1 | <i>Ornithoctonus hainana</i> |
| 30 | GU292932.1 | <i>Ornithoctonus hainana</i> |
| 31 | GU292933.1 | <i>Ornithoctonus hainana</i> |
| 32 | GU292934.1 | <i>Ornithoctonus hainana</i> |
| 33 | GU292935.1 | <i>Ornithoctonus hainana</i> |
| 34 | GU292936.1 | <i>Ornithoctonus hainana</i> |
| 35 | GU292937.1 | <i>Ornithoctonus hainana</i> |
| 36 | GU292938.1 | <i>Ornithoctonus hainana</i> |
| 37 | GU292939.1 | <i>Ornithoctonus hainana</i> |
| 38 | GU292940.1 | <i>Ornithoctonus hainana</i> |
| 39 | GU292941.1 | <i>Ornithoctonus hainana</i> |
| 40 | GU292942.1 | <i>Ornithoctonus hainana</i> |
| 41 | GU292943.1 | <i>Ornithoctonus hainana</i> |
| 42 | GU292944.1 | <i>Ornithoctonus hainana</i> |
| 43 | GU292945.1 | <i>Ornithoctonus hainana</i> |
| 44 | GU292946.1 | <i>Ornithoctonus hainana</i> |
| 45 | GU292947.1 | <i>Ornithoctonus hainana</i> |
| 46 | GU292948.1 | <i>Ornithoctonus hainana</i> |
| 47 | GU292949.1 | <i>Ornithoctonus hainana</i> |
| 48 | GU292950.1 | <i>Ornithoctonus hainana</i> |
| 49 | GU292951.1 | <i>Ornithoctonus hainana</i> |

**Table S3: Sequences Analyzed**

|    |            |                                |
|----|------------|--------------------------------|
| 50 | GU292952.1 | <i>Ornithoctonus hainana</i>   |
| 51 | GU292953.1 | <i>Ornithoctonus hainana</i>   |
| 52 | GU292954.1 | <i>Ornithoctonus hainana</i>   |
| 53 | GU292955.1 | <i>Ornithoctonus hainana</i>   |
| 54 | GU292956.1 | <i>Ornithoctonus hainana</i>   |
| 55 | GU292957.1 | <i>Ornithoctonus hainana</i>   |
| 56 | GU292958.1 | <i>Ornithoctonus hainana</i>   |
| 57 | GU292959.1 | <i>Ornithoctonus hainana</i>   |
| 58 | GU292960.1 | <i>Ornithoctonus hainana</i>   |
| 59 | GU292961.1 | <i>Ornithoctonus hainana</i>   |
| 60 | GU292962.1 | <i>Ornithoctonus hainana</i>   |
| 61 | GU292963.1 | <i>Ornithoctonus hainana</i>   |
| 62 | GU292964.1 | <i>Ornithoctonus hainana</i>   |
| 63 | GU292965.1 | <i>Ornithoctonus hainana</i>   |
| 64 | GU292966.1 | <i>Ornithoctonus hainana</i>   |
| 65 | GU292967.1 | <i>Ornithoctonus hainana</i>   |
| 66 | GU292968.1 | <i>Ornithoctonus hainana</i>   |
| 67 | GU292969.1 | <i>Ornithoctonus hainana</i>   |
| 68 | GU292970.1 | <i>Ornithoctonus hainana</i>   |
| 69 | GU292971.1 | <i>Ornithoctonus hainana</i>   |
| 70 | GU292972.1 | <i>Ornithoctonus hainana</i>   |
| 71 | GU292973.1 | <i>Ornithoctonus hainana</i>   |
| 72 | GU292974.1 | <i>Ornithoctonus hainana</i>   |
| 73 | GU292975.1 | <i>Ornithoctonus hainana</i>   |
| 74 | GU292976.1 | <i>Ornithoctonus hainana</i>   |
| 75 | GU170865.1 | <i>Citharischius crawshayi</i> |
| 76 | EF219061.1 | <i>Lasiodora sp</i>            |
| 77 | AB121200.1 | <i>Macrothele gigas</i>        |
| 78 | AB121202.1 | <i>Macrothele gigas</i>        |

| <b>Alpha-latrotoxin</b> |            |                                     |
|-------------------------|------------|-------------------------------------|
| 1                       | Z14086.1   | <i>Latrodectus tredecimguttatus</i> |
| 2                       | X55009.1   | <i>Latrodectus tredecimguttatus</i> |
| 3                       | X92679.1   | <i>Latrodectus tredecimguttatus</i> |
| 4                       | AF069521.1 | <i>Latrodectus tredecimguttatus</i> |
| 5                       | AF134162.1 | <i>Latrodectus tredecimguttatus</i> |
| 6                       | KC414059.1 | <i>Latrodectus mactans</i>          |

**Table S3:** Sequences Analyzed

|    |            |                                     |
|----|------------|-------------------------------------|
| 7  | KC414066.1 | <i>Latrodectus tredecimguttatus</i> |
| 8  | KC414067.1 | <i>Latrodectus tredecimguttatus</i> |
| 9  | KC414034.1 | <i>Latrodectus tredecimguttatus</i> |
| 10 | KC414048.1 | <i>Latrodectus geometricus</i>      |
| 11 | KC414049.1 | <i>Latrodectus geometricus</i>      |
| 12 | KC414050.1 | <i>Latrodectus geometricus</i>      |
| 13 | KC414051.1 | <i>Latrodectus geometricus</i>      |
| 14 | KC414052.1 | <i>Latrodectus geometricus</i>      |
| 15 | KC414036.1 | <i>Latrodectus geometricus</i>      |
| 19 | KC414042.1 | <i>Latrodectus antheratus</i>       |
| 20 | KC414044.1 | <i>Latrodectus corallinus</i>       |
| 21 | KC414045.1 | <i>Latrodectus corallinus</i>       |
| 22 | KC414046.1 | <i>Latrodectus diaguita</i>         |
| 23 | KC414047.1 | <i>Latrodectus diaguita</i>         |
| 24 | KC414060.1 | <i>Latrodectus mirabilis</i>        |
| 25 | KC414061.1 | <i>Latrodectus mirabilis</i>        |
| 26 | KC414062.1 | <i>Latrodectus pallidus</i>         |
| 27 | KC414038.1 | <i>Latrodectus pallidus</i>         |
| 28 | KC414063.1 | <i>Latrodectus renivulvatus</i>     |
| 29 | KC414064.1 | <i>Latrodectus rhodesiensis</i>     |
| 30 | KC414065.1 | <i>Latrodectus rhodesiensis</i>     |
| 31 | KC414041.1 | <i>Latrodectus sp.</i>              |
| 32 | KC414040.1 | <i>Latrodectus sp.</i>              |
| 33 | KC414035.1 | <i>Latrodectus sp.</i>              |
| 34 | KC414068.1 | <i>Latrodectus variegatus</i>       |
| 35 | KC414070.1 | <i>Latrodectus variolus</i>         |
| 36 | KC414043.1 | <i>Latrodectus bishopi</i>          |
| 37 | FR851877.1 | <i>Latrodectus hasseltii</i>        |
| 38 | KC414054.1 | <i>Latrodectus hasseltii</i>        |
| 39 | KC414055.1 | <i>Latrodectus hasseltii</i>        |
| 40 | KC414033.1 | <i>Latrodectus hasseltii</i>        |
| 41 | KC414071.1 | <i>Steatoda capensis</i>            |
| 42 | KC414072.1 | <i>Steatoda grossa</i>              |
| 43 | KC414039.1 | <i>Steatoda grossa</i>              |
| 44 | KC414057.1 | <i>Latrodectus katipo</i>           |
| 45 | KC414058.1 | <i>Latrodectus katipo</i>           |
| 46 | KC414056.1 | <i>Latrodectus hesperus</i>         |

**Table S3:** Sequences Analyzed

|    |            |                             |
|----|------------|-----------------------------|
| 47 | KC414032.1 | <i>Latrodectus hesperus</i> |
| 48 | KC414037.1 | <i>Latrodectus hesperus</i> |
| 49 | KM382064.1 | <i>Latrodectus hesperus</i> |

| <b>U1-lycotoxin family</b> |            |                            |
|----------------------------|------------|----------------------------|
| 1                          | EU925924.1 | <i>Lycosa singoriensis</i> |
| 2                          | EU925925.1 | <i>Lycosa singoriensis</i> |
| 3                          | EU925926.1 | <i>Lycosa singoriensis</i> |
| 4                          | EU925927.1 | <i>Lycosa singoriensis</i> |
| 5                          | EU925928.1 | <i>Lycosa singoriensis</i> |
| 6                          | EU925929.1 | <i>Lycosa singoriensis</i> |
| 7                          | EU925930.1 | <i>Lycosa singoriensis</i> |
| 8                          | EU925931.1 | <i>Lycosa singoriensis</i> |
| 9                          | EU925932.1 | <i>Lycosa singoriensis</i> |
| 10                         | EU925933.1 | <i>Lycosa singoriensis</i> |
| 11                         | EU925934.1 | <i>Lycosa singoriensis</i> |
| 12                         | EU925935.1 | <i>Lycosa singoriensis</i> |
| 13                         | EU925936.1 | <i>Lycosa singoriensis</i> |
| 14                         | EU925937.1 | <i>Lycosa singoriensis</i> |
| 15                         | EU925938.1 | <i>Lycosa singoriensis</i> |
| 16                         | EU925939.1 | <i>Lycosa singoriensis</i> |
| 17                         | EU925940.1 | <i>Lycosa singoriensis</i> |
| 18                         | EU925941.1 | <i>Lycosa singoriensis</i> |
| 19                         | EU925942.1 | <i>Lycosa singoriensis</i> |
| 20                         | EU925943.1 | <i>Lycosa singoriensis</i> |
| 21                         | EU925944.1 | <i>Lycosa singoriensis</i> |
| 22                         | EU925945.1 | <i>Lycosa singoriensis</i> |
| 23                         | EU925946.1 | <i>Lycosa singoriensis</i> |
| 24                         | EU925947.1 | <i>Lycosa singoriensis</i> |
| 25                         | EU925948.1 | <i>Lycosa singoriensis</i> |
| 26                         | EU925949.1 | <i>Lycosa singoriensis</i> |
| 27                         | EU925950.1 | <i>Lycosa singoriensis</i> |
| 28                         | EU925951.1 | <i>Lycosa singoriensis</i> |
| 29                         | EU925952.1 | <i>Lycosa singoriensis</i> |
| 30                         | EU925953.1 | <i>Lycosa singoriensis</i> |
| 31                         | EU925954.1 | <i>Lycosa singoriensis</i> |
| 32                         | EU925955.1 | <i>Lycosa singoriensis</i> |

**Table S3:** Sequences Analyzed

|    |            |                            |
|----|------------|----------------------------|
| 33 | EU925956.1 | <i>Lycosa singoriensis</i> |
| 34 | EU925957.1 | <i>Lycosa singoriensis</i> |
| 35 | EU925958.1 | <i>Lycosa singoriensis</i> |
| 36 | EU925959.1 | <i>Lycosa singoriensis</i> |
| 37 | EU925960.1 | <i>Lycosa singoriensis</i> |
| 38 | EU925961.1 | <i>Lycosa singoriensis</i> |
| 39 | EU925962.1 | <i>Lycosa singoriensis</i> |
| 40 | EU925963.1 | <i>Lycosa singoriensis</i> |
| 41 | EU925964.1 | <i>Lycosa singoriensis</i> |
| 42 | EU925965.1 | <i>Lycosa singoriensis</i> |
| 43 | EU925966.1 | <i>Lycosa singoriensis</i> |
| 44 | EU925967.1 | <i>Lycosa singoriensis</i> |
| 45 | EU925968.1 | <i>Lycosa singoriensis</i> |
| 46 | EU925969.1 | <i>Lycosa singoriensis</i> |
| 47 | EU925970.1 | <i>Lycosa singoriensis</i> |
| 48 | EU925971.1 | <i>Lycosa singoriensis</i> |
| 49 | EU925972.1 | <i>Lycosa singoriensis</i> |
| 50 | EU925973.1 | <i>Lycosa singoriensis</i> |
| 51 | EU925974.1 | <i>Lycosa singoriensis</i> |
| 52 | EU925975.1 | <i>Lycosa singoriensis</i> |
| 53 | EU925976.1 | <i>Lycosa singoriensis</i> |
| 54 | EU925977.1 | <i>Lycosa singoriensis</i> |
| 55 | EU925978.1 | <i>Lycosa singoriensis</i> |
| 56 | EU925979.1 | <i>Lycosa singoriensis</i> |
| 57 | FM863928.1 | <i>Lycosa singoriensis</i> |
| 58 | FM863929.1 | <i>Lycosa singoriensis</i> |
| 59 | FM863931.1 | <i>Lycosa singoriensis</i> |
| 60 | FM863932.1 | <i>Lycosa singoriensis</i> |
| 61 | FM863934.1 | <i>Lycosa singoriensis</i> |
| 62 | FM863935.1 | <i>Lycosa singoriensis</i> |
| 63 | FM863937.1 | <i>Lycosa singoriensis</i> |
| 64 | FM863938.1 | <i>Lycosa singoriensis</i> |
| 65 | FM863939.1 | <i>Lycosa singoriensis</i> |
| 66 | FM863940.1 | <i>Lycosa singoriensis</i> |
| 67 | FM863941.1 | <i>Lycosa singoriensis</i> |
| 68 | FM863942.1 | <i>Lycosa singoriensis</i> |
| 69 | FM863943.1 | <i>Lycosa singoriensis</i> |

**Table S3:** Sequences Analyzed

|     |            |                            |
|-----|------------|----------------------------|
| 70  | FM863944.1 | <i>Lycosa singoriensis</i> |
| 71  | FM863945.1 | <i>Lycosa singoriensis</i> |
| 72  | FM863946.1 | <i>Lycosa singoriensis</i> |
| 73  | FM863947.1 | <i>Lycosa singoriensis</i> |
| 74  | FM863948.1 | <i>Lycosa singoriensis</i> |
| 75  | FM863949.1 | <i>Lycosa singoriensis</i> |
| 76  | FM863950.1 | <i>Lycosa singoriensis</i> |
| 77  | FM863951.1 | <i>Lycosa singoriensis</i> |
| 78  | FM863952.1 | <i>Lycosa singoriensis</i> |
| 79  | FM863953.1 | <i>Lycosa singoriensis</i> |
| 80  | FM863954.1 | <i>Lycosa singoriensis</i> |
| 81  | FM863955.1 | <i>Lycosa singoriensis</i> |
| 82  | FM863956.1 | <i>Lycosa singoriensis</i> |
| 83  | FM863957.1 | <i>Lycosa singoriensis</i> |
| 84  | FM863958.1 | <i>Lycosa singoriensis</i> |
| 85  | FM863959.1 | <i>Lycosa singoriensis</i> |
| 86  | FM863960.1 | <i>Lycosa singoriensis</i> |
| 87  | FM863961.1 | <i>Lycosa singoriensis</i> |
| 88  | FM863962.1 | <i>Lycosa singoriensis</i> |
| 89  | FM863963.1 | <i>Lycosa singoriensis</i> |
| 90  | FM863964.1 | <i>Lycosa singoriensis</i> |
| 91  | FM863965.1 | <i>Lycosa singoriensis</i> |
| 92  | FM863966.1 | <i>Lycosa singoriensis</i> |
| 93  | FM863967.1 | <i>Lycosa singoriensis</i> |
| 94  | FM863968.1 | <i>Lycosa singoriensis</i> |
| 95  | FM863969.1 | <i>Lycosa singoriensis</i> |
| 96  | FM863970.1 | <i>Lycosa singoriensis</i> |
| 97  | FM863971.1 | <i>Lycosa singoriensis</i> |
| 98  | FM863972.1 | <i>Lycosa singoriensis</i> |
| 99  | FM863973.1 | <i>Lycosa singoriensis</i> |
| 100 | FM863974.1 | <i>Lycosa singoriensis</i> |
| 101 | FM863975.1 | <i>Lycosa singoriensis</i> |
| 102 | FM863976.1 | <i>Lycosa singoriensis</i> |
| 103 | FM863977.1 | <i>Lycosa singoriensis</i> |
| 104 | FM863978.1 | <i>Lycosa singoriensis</i> |
| 105 | FM863979.1 | <i>Lycosa singoriensis</i> |
| 106 | FM863980.1 | <i>Lycosa singoriensis</i> |

**Table S3:** Sequences Analyzed

|     |            |                            |
|-----|------------|----------------------------|
| 107 | FM863981.1 | <i>Lycosa singoriensis</i> |
| 108 | FM863982.1 | <i>Lycosa singoriensis</i> |
| 109 | FM863983.1 | <i>Lycosa singoriensis</i> |

| <b><math>\omega</math>-toxins</b> |            |                            |
|-----------------------------------|------------|----------------------------|
| 1                                 | EF523494.1 | <i>Atrax robustus</i>      |
| 2                                 | EF523495.1 | <i>Atrax robustus</i>      |
| 3                                 | EF523496.1 | <i>Atrax robustus</i>      |
| 4                                 | EF523497.1 | <i>Atrax robustus</i>      |
| 5                                 | EF523498.1 | <i>Atrax robustus</i>      |
| 6                                 | EF523499.1 | <i>Atrax robustus</i>      |
| 7                                 | HG001283.1 | <i>Hadronyche infensa</i>  |
| 8                                 | HG001284.1 | <i>Hadronyche infensa</i>  |
| 9                                 | HG001286.1 | <i>Hadronyche infensa</i>  |
| 10                                | HG001304.1 | <i>Hadronyche infensa</i>  |
| 11                                | HG001305.1 | <i>Hadronyche infensa</i>  |
| 12                                | HG001306.1 | <i>Hadronyche infensa</i>  |
| 13                                | HG001307.1 | <i>Hadronyche infensa</i>  |
| 14                                | HG001285.1 | <i>Hadronyche venenata</i> |
| 15                                | HG001287.1 | <i>Hadronyche venenata</i> |
| 16                                | HG001288.1 | <i>Hadronyche venenata</i> |
| 17                                | HG001289.1 | <i>Hadronyche venenata</i> |
| 18                                | HG001290.1 | <i>Hadronyche venenata</i> |
| 19                                | HG001291.1 | <i>Hadronyche venenata</i> |
| 20                                | HG001292.1 | <i>Hadronyche venenata</i> |
| 21                                | HG001313.1 | <i>Hadronyche modesta</i>  |
| 22                                | HG001314.1 | <i>Hadronyche modesta</i>  |
| 23                                | HG001315.1 | <i>Hadronyche modesta</i>  |
| 24                                | HG001316.1 | <i>Hadronyche modesta</i>  |
| 25                                | HG001317.1 | <i>Hadronyche modesta</i>  |
| 26                                | HG001318.1 | <i>Hadronyche modesta</i>  |
| 27                                | HG001319.1 | <i>Hadronyche modesta</i>  |

| <b><math>\kappa</math>-toxins</b> |            |                           |
|-----------------------------------|------------|---------------------------|
| 1                                 | HG001310.1 | <i>Hadronyche versuta</i> |
| 2                                 | HG001311.1 | <i>Hadronyche versuta</i> |

**Table S3:** Sequences Analyzed

|   |         |                            |
|---|---------|----------------------------|
| 3 | Hv1c_2  | <i>Hadronyche versuta</i>  |
| 4 | Hv1c_3  | <i>Hadronyche versuta</i>  |
| 5 | Hv1c_4  | <i>Hadronyche versuta</i>  |
| 6 | Hv1e    | <i>Hadronyche versuta</i>  |
| 7 | Hv1d    | <i>Hadronyche versuta</i>  |
| 8 | Hvn1a_2 | <i>Hadronyche venenata</i> |
| 9 | Hmo1a   | <i>Hadronyche modesta</i>  |

| <b>ICKs</b> |              |                      |
|-------------|--------------|----------------------|
| 1           | GAQE00000004 | <i>Trittame loki</i> |
| 2           | GAQE00000005 | <i>Trittame loki</i> |
| 3           | GAQE00000006 | <i>Trittame loki</i> |
| 4           | GAQE00000007 | <i>Trittame loki</i> |
| 5           | GAQE00000008 | <i>Trittame loki</i> |
| 6           | GAQE00000009 | <i>Trittame loki</i> |
| 7           | GAQE00000010 | <i>Trittame loki</i> |
| 8           | GAQE00000011 | <i>Trittame loki</i> |
| 9           | GAQE00000012 | <i>Trittame loki</i> |
| 10          | GAQE00000013 | <i>Trittame loki</i> |
| 11          | GAQE00000014 | <i>Trittame loki</i> |
| 12          | GAQE00000015 | <i>Trittame loki</i> |
| 13          | GAQE00000016 | <i>Trittame loki</i> |
| 14          | GAQE00000017 | <i>Trittame loki</i> |
| 15          | GAQE00000018 | <i>Trittame loki</i> |
| 16          | GAQE00000019 | <i>Trittame loki</i> |
| 17          | GAQE00000020 | <i>Trittame loki</i> |
| 18          | GAQE00000021 | <i>Trittame loki</i> |
| 19          | GAQE00000022 | <i>Trittame loki</i> |
| 20          | GAQE00000023 | <i>Trittame loki</i> |
| 21          | GAQE00000024 | <i>Trittame loki</i> |
| 22          | GAQE00000025 | <i>Trittame loki</i> |
| 23          | GAQE00000026 | <i>Trittame loki</i> |
| 24          | GAQE00000027 | <i>Trittame loki</i> |
| 25          | GAQE00000028 | <i>Trittame loki</i> |
| 26          | GAQE00000029 | <i>Trittame loki</i> |
| 27          | GAQE00000030 | <i>Trittame loki</i> |
| 28          | GAQE00000031 | <i>Trittame loki</i> |



**Table S3: Sequences Analyzed**

|    |              |                              |
|----|--------------|------------------------------|
| 29 | GAQE00000032 | <i>Trittame loki</i>         |
| 30 | GAQE00000033 | <i>Trittame loki</i>         |
| 31 | GAQE00000034 | <i>Trittame loki</i>         |
| 32 | GAQE00000035 | <i>Trittame loki</i>         |
| 33 | GAQE00000036 | <i>Trittame loki</i>         |
| 34 | GAQE00000037 | <i>Trittame loki</i>         |
| 35 | GAQE00000038 | <i>Trittame loki</i>         |
| 36 | GAQE00000039 | <i>Trittame loki</i>         |
| 37 | GAQE00000040 | <i>Trittame loki</i>         |
| 38 | GAQE00000041 | <i>Trittame loki</i>         |
| 39 | GAQE00000042 | <i>Trittame loki</i>         |
| 40 | GAQE00000043 | <i>Trittame loki</i>         |
| 41 | GAQE00000044 | <i>Trittame loki</i>         |
| 42 | GAQE00000045 | <i>Trittame loki</i>         |
| 43 | EU233886.1   | <i>Chilobrachys jingzhao</i> |
| 44 | EU233887.1   | <i>Chilobrachys jingzhao</i> |
| 45 | EU233884.1   | <i>Chilobrachys jingzhao</i> |
| 46 | EU233902.1   | <i>Chilobrachys jingzhao</i> |
| 47 | AB200997.1   | <i>Grammostola rosea</i>     |

## Cnidaria

| Actinoporins |                |                             |
|--------------|----------------|-----------------------------|
| 1            | AB175824.1     | <i>Actineria villosa</i>    |
| 2            | AB512460.1     | <i>Hydra magnipapillata</i> |
| 3            | AB512462.1     | <i>Hydra magnipapillata</i> |
| 4            | AB512463.1     | <i>Hydra magnipapillata</i> |
| 5            | U41661.1       | <i>Actinia equina</i>       |
| 6            | U51900.1       | <i>Actinia equina</i>       |
| 7            | AF057028.1     | <i>Actinia equina</i>       |
| 8            | FM958450.1     | <i>Actinia fragacea</i>     |
| 9            | AB479475.1     | <i>Anthopleura asiatica</i> |
| 10           | AY855350.1     | <i>Heteractis crispa</i>    |
| 11           | AF170706.1     | <i>Heteractis magnifica</i> |
| 12           | XM_004206398.1 | <i>Hydra magnipapillata</i> |
| 13           | XM_002166243.2 | <i>Hydra magnipapillata</i> |
| 14           | XM_002153869.2 | <i>Hydra magnipapillata</i> |

**Table S3: Sequences Analyzed**

|    |                |                                 |
|----|----------------|---------------------------------|
| 15 | AY861662.1     | <i>Oulactis orientalis</i>      |
| 16 | AY856481.1     | <i>Oulactis orientalis</i>      |
| 17 | AB063314.1     | <i>Phyllodiscus semoni</i>      |
| 18 | AB512461.1     | <i>Phyllodiscus semoni</i>      |
| 19 | AY247033.1     | <i>Sagartia rosea</i>           |
| 20 | JQ353486.1     | <i>Stichodactyla gigantea</i>   |
| 21 | AJ009931.2     | <i>Stichodactyla helianthus</i> |
| 22 | AJ005038.1     | <i>Stichodactyla helianthus</i> |
| 23 | GQ848199.1     | <i>Urticina crassicornis</i>    |
| 24 | GASU01034529.1 | <i>Acropora cervicornis</i>     |
| 25 | GASU01040226.1 | <i>Acropora cervicornis</i>     |
| 26 | JR995219.1     | <i>Acropora millepora</i>       |
| 27 | JV077412.1     | <i>Aiptasia pallida</i>         |
| 28 | JV105615.1     | <i>Aiptasia pallida</i>         |
| 29 | JV093095.1     | <i>Aiptasia pallida</i>         |
| 30 | GAOL01019782.1 | <i>Hydra magnipapillata</i>     |
| 31 | GAOL01019715.1 | <i>Hydra magnipapillata</i>     |
| 32 | GAOL01014507.1 | <i>Hydra magnipapillata</i>     |
| 33 | GBFD01000386.1 | <i>Hydra oligactis</i>          |
| 34 | GBFD01006301.1 | <i>Hydra oligactis</i>          |
| 35 | GBFD01006728.1 | <i>Hydra oligactis</i>          |
| 36 | FX502289.1     | <i>Porites australiensis</i>    |
| 37 | FX459751.1     | <i>Porites australiensis</i>    |
| 38 | FX442360.1     | <i>Porites australiensis</i>    |
| 39 | FX440461.1     | <i>Porites australiensis</i>    |
| 40 | GARY01005673.1 | <i>Stylophora pistillata</i>    |

| <b>Hydralysins</b> |                |                                      |
|--------------------|----------------|--------------------------------------|
| 1                  | AY178276.1     | <i>Chlorohydra viridissima</i>       |
| 2                  | AY655142.1     | <i>Hydra viridis</i>                 |
| 3                  | AY967765.1     | <i>Hydra viridis</i>                 |
| 4                  | AY967764.1     | <i>Hydra vulgaris</i>                |
| 5                  | XM_002159227.1 | <i>Hydra magnipapillata</i>          |
| 6                  | XM_002158818.2 | <i>Hydra magnipapillata</i>          |
| 7                  | GBFD01009683.1 | <i>Hydra oligactis</i>               |
| 8                  | GAWH01023705.1 | <i>Hydractinia symbiolongicarpus</i> |
| 9                  | DT617282.1     | <i>Hydra magnipapillata</i>          |

**Table S3: Sequences Analyzed**

|    |            |                       |
|----|------------|-----------------------|
| 10 | DY447211.1 | <i>Hydra vulgaris</i> |
| 11 | DT620560.1 | <i>Hydra vulgaris</i> |
| 12 | DY447352.1 | <i>Hydra vulgaris</i> |
| 13 | DY447829.1 | <i>Hydra vulgaris</i> |
| 14 | DY447101.1 | <i>Hydra vulgaris</i> |
| 15 | DY447107.1 | <i>Hydra vulgaris</i> |
| 16 | DY450368.1 | <i>Hydra vulgaris</i> |
| 17 | DY447499.1 | <i>Hydra vulgaris</i> |

| <b>Sea anemone aerolysins</b> |              |                               |
|-------------------------------|--------------|-------------------------------|
| 1                             | XM_001621963 | <i>Nematostella vectensis</i> |
| 2                             | XM_001624302 | <i>Nematostella vectensis</i> |
| 3                             | XM_001626030 | <i>Nematostella vectensis</i> |
| 4                             | XM_001629432 | <i>Nematostella vectensis</i> |
| 5                             | XM_001633913 | <i>Nematostella vectensis</i> |
| 6                             | XM_001634484 | <i>Nematostella vectensis</i> |
| 7                             | XM_001639868 | <i>Nematostella vectensis</i> |
| 8                             | XM_001639869 | <i>Nematostella vectensis</i> |
| 9                             | XM_001642043 | <i>Nematostella vectensis</i> |
| 10                            | FX474743     | <i>Porites australiensis</i>  |
| 11                            | FX460673     | <i>Porites australiensis</i>  |
| 12                            | GARY01026036 | <i>Stylophora pistillata</i>  |
| 13                            | GARY01008641 | <i>Stylophora pistillata</i>  |

| <b>KTX Type III</b> |            |                                  |
|---------------------|------------|----------------------------------|
| 1                   | FK725211.1 | <i>Anemonia viridis</i>          |
| 2                   | FK735214.1 | <i>Anemonia viridis</i>          |
| 3                   | FK723172.1 | <i>Anemonia viridis</i>          |
| 4                   | FK742129.1 | <i>Anemonia viridis</i>          |
| 5                   | FK752236.1 | <i>Anemonia viridis</i>          |
| 6                   | FK745823.1 | <i>Anemonia viridis</i>          |
| 7                   | FK740326.1 | <i>Anemonia viridis</i>          |
| 8                   | FK719896.1 | <i>Anemonia viridis</i>          |
| 9                   | FG392547.1 | <i>Anthopleura elegantissima</i> |
| 10                  | AB180686.1 | <i>Antheopsis maculata</i>       |
| 11                  | HE577145.1 | <i>Bunodosoma granulifera</i>    |

**Table S3: Sequences Analyzed**

|    |            |                               |
|----|------------|-------------------------------|
| 12 | HE577147.1 | <i>Bunodosoma granulifera</i> |
| 13 | HE577146.1 | <i>Bunodosoma granulifera</i> |
| 14 | HE577148.1 | <i>Bunodosoma granulifera</i> |

| <b>KTX Type I</b> |            |                                 |
|-------------------|------------|---------------------------------|
| 1                 | AB259113.1 | <i>Anemonia erythraea</i>       |
| 2                 | AB595207.1 | <i>Cryptodendrum adhaesivum</i> |
| 3                 | AF020047.1 | <i>Heteractis magnifica</i>     |
| 4                 | AB595208.1 | <i>Heterodactyla hemprichi</i>  |
| 5                 | AB595204.1 | <i>Stichodactyla gigantea</i>   |
| 6                 | AB595205.1 | <i>Stichodactyla haddoni</i>    |
| 7                 | AB595206.1 | <i>Stichodactyla mertensii</i>  |
| 8                 | AB595209.1 | <i>Thalassianthus aster</i>     |
| 9                 | FK756695.1 | <i>Anemonia viridis</i>         |
| 10                | FK738108.1 | <i>Anemonia viridis</i>         |
| 11                | FK747792.1 | <i>Anemonia viridis</i>         |
| 12                | FK749797.1 | <i>Anemonia viridis</i>         |
| 13                | FC826524.1 | <i>Metridium senile</i>         |
| 14                | FC850067.1 | <i>Metridium senile</i>         |
| 15                | FC850068.1 | <i>Metridium senile</i>         |

| <b>NaTx</b> |          |                                 |
|-------------|----------|---------------------------------|
| 1           | AB512763 | <i>Thalassianthus aster</i>     |
| 2           | AB512762 | <i>Heterodactyla hemprichi</i>  |
| 3           | AB362570 | <i>Stichodactyla haddoni</i>    |
| 4           | AB110015 | <i>Stichodactyla gigantea</i>   |
| 5           | AB512761 | <i>Cryptodendrum adhaesivum</i> |
| 6           | EU124458 | <i>Nematostella vectensis</i>   |
| 7           | EU124460 | <i>Nematostella vectensis</i>   |
| 8           | EU124454 | <i>Nematostella vectensis</i>   |
| 9           | EU422969 | <i>Nematostella vectensis</i>   |
| 10          | EU124461 | <i>Nematostella vectensis</i>   |
| 11          | EU124462 | <i>Nematostella vectensis</i>   |
| 12          | AF130344 | <i>Actinia equina</i>           |
| 13          | EU124478 | <i>Actinia equina</i>           |
| 14          | EU124479 | <i>Actinia equina</i>           |

**Table S3:** Sequences Analyzed

|    |          |                               |
|----|----------|-------------------------------|
| 15 | EU124480 | <i>Actinia equina</i>         |
| 16 | EU124481 | <i>Actinia equina</i>         |
| 17 | EU124482 | <i>Actinia equina</i>         |
| 18 | EU124483 | <i>Actinia equina</i>         |
| 19 | FJ418889 | <i>Aiptasia diaphana</i>      |
| 20 | EU124447 | <i>Anemonia viridis</i>       |
| 21 | EU124448 | <i>Anemonia viridis</i>       |
| 22 | EU124449 | <i>Anemonia viridis</i>       |
| 23 | EU124450 | <i>Anemonia viridis</i>       |
| 24 | EU124451 | <i>Anemonia viridis</i>       |
| 25 | EU124452 | <i>Anemonia viridis</i>       |
| 26 | EU124470 | <i>Anemonia viridis</i>       |
| 27 | EU124471 | <i>Anemonia viridis</i>       |
| 28 | EU124472 | <i>Anemonia viridis</i>       |
| 29 | EU124473 | <i>Anemonia viridis</i>       |
| 30 | EU124474 | <i>Anemonia viridis</i>       |
| 31 | EU124475 | <i>Anemonia viridis</i>       |
| 32 | EU124476 | <i>Anemonia viridis</i>       |
| 33 | EU124477 | <i>Anemonia viridis</i>       |
| 34 | EU919736 | <i>Anemonia viridis</i>       |
| 35 | AB180687 | <i>Antheopsis maculata</i>    |
| 36 | EU124453 | <i>Nematostella vectensis</i> |
| 37 | EU124455 | <i>Nematostella vectensis</i> |
| 38 | EU124456 | <i>Nematostella vectensis</i> |
| 39 | EU124457 | <i>Nematostella vectensis</i> |
| 40 | EU124459 | <i>Nematostella vectensis</i> |
| 41 | EU124463 | <i>Nematostella vectensis</i> |
| 42 | EU124464 | <i>Nematostella vectensis</i> |
| 43 | EU124465 | <i>Nematostella vectensis</i> |
| 44 | EU124466 | <i>Nematostella vectensis</i> |
| 45 | EU124467 | <i>Nematostella vectensis</i> |
| 46 | EU124468 | <i>Nematostella vectensis</i> |
| 47 | EU124469 | <i>Nematostella vectensis</i> |
| 48 | EU422968 | <i>Nematostella vectensis</i> |
| 49 | EU422970 | <i>Nematostella vectensis</i> |
| 50 | EU422971 | <i>Nematostella vectensis</i> |
| 51 | EU422972 | <i>Nematostella vectensis</i> |

**Table S3: Sequences Analyzed**

|    |          |                                  |
|----|----------|----------------------------------|
| 52 | AB110012 | <i>Stichodactyla gigantea</i>    |
| 53 | GU080213 | <i>Urticina crassicornis</i>     |
| 54 | S69403   | <i>Calliactis parasitica</i>     |
| 55 | FK740862 | <i>Anemonia viridis</i>          |
| 56 | FK756631 | <i>Anemonia viridis</i>          |
| 57 | FK755129 | <i>Anemonia viridis</i>          |
| 58 | FK730949 | <i>Anemonia viridis</i>          |
| 59 | FG392551 | <i>Anthopleura elegantissima</i> |
| 60 | FK754096 | <i>Anemonia viridis</i>          |
| 61 | FK728784 | <i>Anemonia viridis</i>          |
| 62 | FK749453 | <i>Anemonia viridis</i>          |
| 63 | FC830246 | <i>Metridium senile</i>          |
| 64 | FC830245 | <i>Metridium senile</i>          |

| <b>JFTs</b> |                |                                      |
|-------------|----------------|--------------------------------------|
| 1           | EF636902.1     | <i>Chironex fleckeri</i>             |
| 2           | AB045319.1     | <i>Chiropsalmus quadrigatus</i>      |
| 3           | EF636903.1     | <i>Chironex fleckeri</i>             |
| 4           | FJ705827.1     | <i>Malo kingi</i>                    |
| 5           | FJ705828.1     | <i>Malo kingi</i>                    |
| 6           | AB015878.1     | <i>Carybdea rastonii</i>             |
| 7           | JN695597.1     | <i>Chironex fleckeri</i>             |
| 8           | JN695598.1     | <i>Chironex fleckeri</i>             |
| 9           | AB036714.1     | <i>Carybdea alata</i>                |
| 10          | AB038156.1     | <i>Carybdea alata</i>                |
| 11          | KF583451.1     | <i>Chironex fleckeri</i>             |
| 12          | JQ767939.1     | <i>Aurelia aurita</i>                |
| 13          | GAWH01043751.1 | <i>Hydractinia symbiolongicarpus</i> |
| 14          | JV127292.1     | <i>Aiptasia pallida</i>              |
| 15          | DN136432.2     | <i>Hydra vulgaris</i>                |

| <b>SCRiPs</b> |            |                              |
|---------------|------------|------------------------------|
| 1             | BK006534.1 | <i>Acropora millepora</i>    |
| 2             | BK006535.1 | <i>Acropora millepora</i>    |
| 3             | BK006536.1 | <i>Acropora millepora</i>    |
| 4             | FJ842102.1 | <i>Montastraea faveolata</i> |

**Table S3: Sequences Analyzed**

|    |                |                              |
|----|----------------|------------------------------|
| 5  | FJ842103.1     | <i>Montastraea faveolata</i> |
| 7  | FJ842105.1     | <i>Montastraea faveolata</i> |
| 8  | FJ842106.1     | <i>Montastraea faveolata</i> |
| 9  | FJ842107.1     | <i>Montastraea faveolata</i> |
| 10 | BK006537.1     | <i>Montipora capitata</i>    |
| 11 | BK006538.1     | <i>Montipora capitata</i>    |
| 12 | FJ842109.1     | <i>Montastraea faveolata</i> |
| 13 | GASU01030089.1 | <i>Acropora cervicornis</i>  |
| 14 | EZ034312.1     | <i>Acropora millepora</i>    |
| 15 | JR979467.1     | <i>Acropora millepora</i>    |
| 16 | FX437264.1     | <i>Porites australiensis</i> |
| 17 | GARY01020093.1 | <i>Stylophora pistillata</i> |
| 18 | DY579894.1     | <i>Acropora millepora</i>    |
| 19 | GO003724.1     | <i>Acropora millepora</i>    |
| 20 | GW196571.1     | <i>Acropora palmata</i>      |
| 21 | GW196827.1     | <i>Acropora palmata</i>      |
| 24 | DR987968.1     | <i>Montastraea faveolata</i> |
| 25 | DR987884.2     | <i>Montastraea faveolata</i> |
| 26 | GW249328.1     | <i>Montastraea faveolata</i> |
| 27 | GW258233.1     | <i>Montastraea faveolata</i> |
| 28 | GW256578.1     | <i>Montastraea faveolata</i> |

## Scorpions

| <b><math>\alpha</math>-NaTx</b> |          |                             |
|---------------------------------|----------|-----------------------------|
| 1                               | AF057554 | <i>Mesobuthus martensii</i> |
| 2                               | AF062563 | <i>Mesobuthus martensii</i> |
| 3                               | AF114025 | <i>Mesobuthus martensii</i> |
| 4                               | AF132974 | <i>Mesobuthus martensii</i> |
| 6                               | AF150009 | <i>Mesobuthus martensii</i> |
| 7                               | AF150011 | <i>Mesobuthus martensii</i> |
| 8                               | AF151796 | <i>Mesobuthus martensii</i> |
| 9                               | AF153693 | <i>Mesobuthus martensii</i> |
| 10                              | AF155363 | <i>Mesobuthus martensii</i> |
| 11                              | AF155364 | <i>Mesobuthus martensii</i> |
| 12                              | AF156168 | <i>Mesobuthus martensii</i> |
| 13                              | AF156169 | <i>Mesobuthus martensii</i> |

**Table S3:** Sequences Analyzed

|    |          |                                 |
|----|----------|---------------------------------|
| 14 | AF156172 | <i>Mesobuthus martensii</i>     |
| 15 | AF156595 | <i>Mesobuthus martensii</i>     |
| 16 | AF156597 | <i>Mesobuthus martensii</i>     |
| 17 | AF163016 | <i>Mesobuthus martensii</i>     |
| 18 | AF163017 | <i>Mesobuthus martensii</i>     |
| 19 | AF164203 | <i>Mesobuthus martensii</i>     |
| 20 | AF288607 | <i>Mesobuthus martensii</i>     |
| 21 | AF288608 | <i>Mesobuthus martensii</i>     |
| 22 | AF370023 | <i>Mesobuthus martensii</i>     |
| 23 | AF464898 | <i>Mesobuthus martensii</i>     |
| 24 | AJ308439 | <i>Androctonus australis</i>    |
| 25 | AJ308440 | <i>Androctonus australis</i>    |
| 26 | AJ308441 | <i>Androctonus australis</i>    |
| 27 | AJ496808 | <i>Androctonus mauretanicus</i> |
| 28 | AJ536595 | <i>Androctonus amoreuxi</i>     |
| 29 | AJ536596 | <i>Androctonus amoreuxi</i>     |
| 30 | AJ536597 | <i>Androctonus amoreuxi</i>     |
| 31 | AM159181 | <i>Androctonus mauretanicus</i> |
| 32 | AM159182 | <i>Androctonus mauretanicus</i> |
| 33 | AY585097 | <i>Hottentotta judaicus</i>     |
| 34 | DQ058408 | <i>Mesobuthus martensii</i>     |
| 35 | EU159278 | <i>Lychas mucronatus</i>        |
| 36 | EU159285 | <i>Lychas mucronatus</i>        |
| 37 | EU514685 | <i>Parabuthus granulatus</i>    |
| 38 | FN392284 | <i>Tityus discrepans</i>        |
| 39 | GQ454796 | <i>Androctonus crassicauda</i>  |
| 40 | HE585232 | <i>Tityus cambridgei</i>        |
| 41 | HE585233 | <i>Tityus cambridgei</i>        |
| 42 | HE585239 | <i>Tityus pachyurus</i>         |
| 43 | M27701   | <i>Androctonus australis</i>    |
| 44 | M27702   | <i>Androctonus australis</i>    |
| 45 | M27703   | <i>Androctonus australis</i>    |
| 46 | M27704   | <i>Androctonus australis</i>    |
| 47 | S69808   | <i>Tityus serrulatus</i>        |
| 48 | S82286   | <i>Tityus serrulatus</i>        |
| 49 | U28659   | <i>Mesobuthus martensii</i>     |
| 50 | U28660   | <i>Buthus martensii</i>         |



**Table S3:** Sequences Analyzed

|    |          |                                   |
|----|----------|-----------------------------------|
| 51 | X76135   | <i>Androctonus australis</i>      |
| 52 | X92376   | <i>Buthus occitanus tunetanus</i> |
| 53 | GT028649 | <i>Lychas mucronatus</i>          |
| 54 | GT028758 | <i>Lychas mucronatus</i>          |
| 55 | GT028835 | <i>Lychas mucronatus</i>          |
| 56 | GT028836 | <i>Lychas mucronatus</i>          |
| 57 | GT029030 | <i>Lychas mucronatus</i>          |
| 58 | GT029188 | <i>Lychas mucronatus</i>          |

| <b><math>\beta</math>-NaTx</b> |                |                                |
|--------------------------------|----------------|--------------------------------|
| 1                              | GALK01000007.1 | <i>Isometroides vescus</i>     |
| 2                              | GALK01000008.1 | <i>Isometroides vescus</i>     |
| 3                              | M27705.1       | <i>Androctonus australis</i>   |
| 4                              | M27706.1       | <i>Androctonus australis</i>   |
| 5                              | M27707.1       | <i>Androctonus australis</i>   |
| 6                              | GQ454796.1     | <i>Androctonus crassicauda</i> |
| 7                              | AF338448.1     | <i>Centruroides exilicauda</i> |
| 8                              | AF338449.1     | <i>Centruroides exilicauda</i> |
| 9                              | AF338450.1     | <i>Centruroides exilicauda</i> |
| 10                             | AF338451.1     | <i>Centruroides exilicauda</i> |
| 11                             | AF338452.1     | <i>Centruroides exilicauda</i> |
| 12                             | AF338453.1     | <i>Centruroides exilicauda</i> |
| 13                             | AF338454.1     | <i>Centruroides exilicauda</i> |
| 14                             | AF338455.1     | <i>Centruroides exilicauda</i> |
| 15                             | AF338456.1     | <i>Centruroides exilicauda</i> |
| 16                             | AF338457.1     | <i>Centruroides exilicauda</i> |
| 17                             | AF338458.1     | <i>Centruroides exilicauda</i> |
| 18                             | AF338459.1     | <i>Centruroides exilicauda</i> |
| 19                             | AF338460.1     | <i>Centruroides exilicauda</i> |
| 20                             | AF338461.1     | <i>Centruroides exilicauda</i> |
| 21                             | AF338462.1     | <i>Centruroides exilicauda</i> |
| 22                             | AF338463.1     | <i>Centruroides exilicauda</i> |
| 23                             | AF338464.1     | <i>Centruroides exilicauda</i> |
| 24                             | AY649859.1     | <i>Centruroides exilicauda</i> |
| 25                             | AY649860.1     | <i>Centruroides exilicauda</i> |
| 26                             | AY649862.1     | <i>Centruroides exilicauda</i> |
| 27                             | AY649870.1     | <i>Centruroides exilicauda</i> |

**Table S3:** Sequences Analyzed

|    |            |                                |
|----|------------|--------------------------------|
| 28 | AF387171.1 | <i>Centruroides limpidus</i>   |
| 29 | AF488349.1 | <i>Centruroides limpidus</i>   |
| 30 | AF491127.1 | <i>Centruroides limpidus</i>   |
| 31 | AF491128.1 | <i>Centruroides limpidus</i>   |
| 32 | AF491129.1 | <i>Centruroides limpidus</i>   |
| 33 | AF491130.1 | <i>Centruroides limpidus</i>   |
| 34 | AF491131.1 | <i>Centruroides limpidus</i>   |
| 35 | AF491132.1 | <i>Centruroides limpidus</i>   |
| 36 | AF491133.1 | <i>Centruroides limpidus</i>   |
| 37 | L05060.1   | <i>Centruroides noxius</i>     |
| 38 | L05061.1   | <i>Centruroides noxius</i>     |
| 39 | L05062.1   | <i>Centruroides noxius</i>     |
| 40 | L05063.1   | <i>Centruroides noxius</i>     |
| 41 | S81093.1   | <i>Centruroides noxius</i>     |
| 42 | S81096.1   | <i>Centruroides noxius</i>     |
| 43 | Y08270.1   | <i>Centruroides noxius</i>     |
| 44 | AY351309.1 | <i>Centruroides noxius</i>     |
| 45 | AY351310.1 | <i>Centruroides noxius</i>     |
| 46 | AM981271.1 | <i>Centruroides suffusus</i>   |
| 47 | S55535.1   | <i>Hottentotta judaicus</i>    |
| 48 | AJ012312.1 | <i>Buthotus judaicus</i>       |
| 49 | AJ012313.1 | <i>Buthotus judaicus</i>       |
| 50 | S55538.1   | <i>Leiurus quinquestriatus</i> |
| 51 | AF474983.1 | <i>Leiurus quinquestriatus</i> |
| 52 | AF474984.1 | <i>Leiurus quinquestriatus</i> |
| 53 | AF474985.1 | <i>Leiurus quinquestriatus</i> |
| 54 | EU159276.1 | <i>Lychas mucronatus</i>       |
| 55 | EU159292.1 | <i>Lychas mucronatus</i>       |
| 56 | EU159303.1 | <i>Lychas mucronatus</i>       |
| 57 | Y17050.1   | <i>Buthus martensii</i>        |
| 58 | AF057555.1 | <i>Buthus martensii</i>        |
| 59 | AF062564.1 | <i>Buthus martensii</i>        |
| 60 | AF055672.1 | <i>Buthus martensii</i>        |
| 61 | AF079061.1 | <i>Buthus martensii</i>        |
| 62 | AF132977.1 | <i>Buthus martensii</i>        |
| 63 | AF156171.1 | <i>Buthus martensii</i>        |
| 64 | AF064821.2 | <i>Buthus martensii</i>        |

**Table S3:** Sequences Analyzed

|     |            |                           |
|-----|------------|---------------------------|
| 65  | AF073899.2 | <i>Buthus martensii</i>   |
| 66  | AF241269.1 | <i>Buthus martensii</i>   |
| 67  | AF122003.1 | <i>Buthus martensii</i>   |
| 68  | AF242736.1 | <i>Buthus martensii</i>   |
| 69  | AF242737.1 | <i>Buthus martensii</i>   |
| 70  | AF272777.2 | <i>Buthus martensii</i>   |
| 71  | AF160868.2 | <i>Buthus martensii</i>   |
| 72  | AY090782.1 | <i>Buthus martensii</i>   |
| 73  | AF513508.1 | <i>Buthus martensii</i>   |
| 74  | HM233942.1 | <i>Rhopalurus junceus</i> |
| 75  | HM233951.1 | <i>Rhopalurus junceus</i> |
| 76  | HM233952.1 | <i>Rhopalurus junceus</i> |
| 77  | HM233953.1 | <i>Rhopalurus junceus</i> |
| 78  | HM233954.1 | <i>Rhopalurus junceus</i> |
| 79  | HM233955.1 | <i>Rhopalurus junceus</i> |
| 80  | HM233956.1 | <i>Rhopalurus junceus</i> |
| 81  | JF309048.1 | <i>Rhopalurus junceus</i> |
| 82  | HE585226.1 | <i>Tityus cambridgei</i>  |
| 83  | HE585227.1 | <i>Tityus cambridgei</i>  |
| 84  | HE585228.1 | <i>Tityus cambridgei</i>  |
| 85  | HE585231.1 | <i>Tityus cambridgei</i>  |
| 86  | HE585234.1 | <i>Tityus cambridgei</i>  |
| 87  | HE585235.1 | <i>Tityus cambridgei</i>  |
| 88  | HE585238.1 | <i>Tityus cambridgei</i>  |
| 89  | AY740693.1 | <i>Tityus costatus</i>    |
| 90  | DQ075226.1 | <i>Tityus discrepans</i>  |
| 91  | DQ075227.1 | <i>Tityus discrepans</i>  |
| 92  | DQ075228.1 | <i>Tityus discrepans</i>  |
| 93  | DQ075229.1 | <i>Tityus discrepans</i>  |
| 94  | DQ075230.1 | <i>Tityus discrepans</i>  |
| 95  | DQ075233.1 | <i>Tityus discrepans</i>  |
| 96  | DQ075234.1 | <i>Tityus discrepans</i>  |
| 97  | DQ075239.1 | <i>Tityus discrepans</i>  |
| 98  | DQ075242.1 | <i>Tityus discrepans</i>  |
| 99  | DQ075243.1 | <i>Tityus discrepans</i>  |
| 100 | FN392272.1 | <i>Tityus discrepans</i>  |
| 101 | FN392273.1 | <i>Tityus discrepans</i>  |

**Table S3:** Sequences Analyzed

|     |            |                          |
|-----|------------|--------------------------|
| 102 | FN392274.1 | <i>Tityus discrepans</i> |
| 103 | FN392275.1 | <i>Tityus discrepans</i> |
| 104 | FN392276.1 | <i>Tityus discrepans</i> |
| 105 | FN392277.1 | <i>Tityus discrepans</i> |
| 106 | FN392279.1 | <i>Tityus discrepans</i> |
| 107 | FN392280.1 | <i>Tityus discrepans</i> |
| 108 | FN392281.1 | <i>Tityus discrepans</i> |
| 109 | FN392282.1 | <i>Tityus discrepans</i> |
| 110 | FN392283.1 | <i>Tityus discrepans</i> |
| 111 | FN392285.1 | <i>Tityus discrepans</i> |
| 112 | HE585240.1 | <i>Tityus pachyurus</i>  |
| 113 | HE585241.1 | <i>Tityus pachyurus</i>  |
| 114 | HE585242.1 | <i>Tityus pachyurus</i>  |
| 115 | HE585243.1 | <i>Tityus pachyurus</i>  |
| 116 | X66256.1   | <i>Tityus serrulatus</i> |
| 117 | S66941.1   | <i>Tityus serrulatus</i> |
| 118 | AF039599.1 | <i>Tityus serrulatus</i> |
| 119 | AF039600.1 | <i>Tityus serrulatus</i> |
| 120 | AY874060.1 | <i>Tityus zulianus</i>   |
| 121 | DQ075235.1 | <i>Tityus zulianus</i>   |
| 122 | DQ075236.1 | <i>Tityus zulianus</i>   |
| 123 | DQ075238.1 | <i>Tityus zulianus</i>   |
| 124 | DQ075240.1 | <i>Tityus zulianus</i>   |
| 125 | DQ075241.1 | <i>Tityus zulianus</i>   |
| 126 | GT028621   | <i>Lychas mucronatus</i> |
| 127 | GT028626   | <i>Lychas mucronatus</i> |
| 128 | GT028829   | <i>Lychas mucronatus</i> |
| 129 | GT028830   | <i>Lychas mucronatus</i> |
| 130 | GT028833   | <i>Lychas mucronatus</i> |
| 131 | GT028885   | <i>Lychas mucronatus</i> |
| 132 | GT028975   | <i>Lychas mucronatus</i> |

| <b>Chloride</b> |            |                             |
|-----------------|------------|-----------------------------|
| 1               | HQ288093.1 | <i>Hottentotta judaicus</i> |
| 2               | AF481880.1 | <i>Mesobuthus tamulus</i>   |
| 3               | AF481881.1 | <i>Mesobuthus tamulus</i>   |
| 4               | EF445087.1 | <i>Mesobuthus eupeus</i>    |

**Table S3:** Sequences Analyzed

|    |            |                                  |
|----|------------|----------------------------------|
| 5  | EF445088.1 | <i>Mesobuthus eupeus</i>         |
| 6  | GU187951.1 | <i>Mesobuthus eupeus</i>         |
| 7  | GU187952.1 | <i>Mesobuthus eupeus</i>         |
| 8  | GU187953.1 | <i>Mesobuthus eupeus</i>         |
| 9  | HQ853233.1 | <i>Mesobuthus eupeus</i>         |
| 10 | AF079059.1 | <i>Mesobuthus martensii</i>      |
| 11 | AF135821.1 | <i>Mesobuthus martensii</i>      |
| 12 | AF327643.1 | <i>Buthus martensii</i>          |
| 13 | AF155365.1 | <i>Buthus martensii</i>          |
| 14 | AF159976.1 | <i>Buthus martensii</i>          |
| 15 | AY055475.1 | <i>Buthus martensii</i>          |
| 16 | AF419252.1 | <i>Buthus martensii</i>          |
| 17 | FJ360812.1 | <i>Buthus occitanus israelis</i> |
| 18 | FJ360814.1 | <i>Buthus occitanus israelis</i> |
| 19 | FJ360816.1 | <i>Buthus occitanus israelis</i> |
| 20 | FJ360813.1 | <i>Buthus occitanus israelis</i> |
| 21 | FJ360815.1 | <i>Buthus occitanus israelis</i> |

| Long KTx |                |                                     |
|----------|----------------|-------------------------------------|
| 1        | GALG01000001.1 | <i>Australobuthus xerolimniorum</i> |
| 2        | GALH01000007.1 | <i>Cercophonius squama</i>          |
| 3        | GALH01000006.1 | <i>Cercophonius squama</i>          |
| 4        | GALH01000005.1 | <i>Cercophonius squama</i>          |
| 5        | GALH01000004.1 | <i>Cercophonius squama</i>          |
| 6        | GALK01000011.1 | <i>Isometroides vescus</i>          |
| 7        | GALK01000010.1 | <i>Isometroides vescus</i>          |
| 8        | GALK01000009.1 | <i>Isometroides vescus</i>          |
| 9        | GALL01000012.1 | <i>Lychas buchari</i>               |
| 10       | GALI01000013.1 | <i>Urodacus manicatus</i>           |
| 11       | GALI01000012.1 | <i>Urodacus manicatus</i>           |
| 12       | GALI01000011.1 | <i>Urodacus manicatus</i>           |
| 13       | AF156173.1     | <i>Buthus martensii</i>             |
| 14       | AF155370.1     | <i>Buthus martensii</i>             |
| 15       | AF155371.1     | <i>Buthus martensii</i>             |
| 16       | AF380939.1     | <i>Buthus martensii</i>             |
| 17       | FJ360825.1     | <i>Buthus occitanus</i>             |
| 18       | FJ360829.1     | <i>Buthus occitanus israelis</i>    |

**Table S3:** Sequences Analyzed

|    |            |                                   |
|----|------------|-----------------------------------|
| 19 | DQ465350.1 | <i>Hadrurus gertschi</i>          |
| 20 | DQ465351.1 | <i>Hadrurus gertschi</i>          |
| 21 | AB510468.1 | <i>Liocheles australasiae</i>     |
| 22 | EU163853.1 | <i>Lychas mucronatus</i>          |
| 23 | EU163858.1 | <i>Lychas mucronatus</i>          |
| 24 | EU877535.1 | <i>Lychas mucronatus</i>          |
| 25 | EU877536.1 | <i>Lychas mucronatus</i>          |
| 26 | EF442047.1 | <i>Mesobuthus eupeus</i>          |
| 27 | EF445076.1 | <i>Mesobuthus eupeus</i>          |
| 28 | EF445099.1 | <i>Mesobuthus eupeus</i>          |
| 29 | EF190324.1 | <i>Mesobuthus eupeus</i>          |
| 30 | EF190325.1 | <i>Mesobuthus eupeus</i>          |
| 31 | EF442062.1 | <i>Mesobuthus eupeus</i>          |
| 32 | EF445098.1 | <i>Mesobuthus eupeus</i>          |
| 33 | AF153691.1 | <i>Mesobuthus martensii</i>       |
| 34 | FM998749.1 | <i>Opisthacanthus cayaporum</i>   |
| 35 | AY423481.1 | <i>Opisthophthalmus carinatus</i> |
| 36 | AY423482.1 | <i>Opisthophthalmus carinatus</i> |
| 37 | AY423483.1 | <i>Opisthophthalmus carinatus</i> |
| 38 | AY423484.1 | <i>Opisthophthalmus carinatus</i> |
| 39 | AY423485.1 | <i>Opisthophthalmus carinatus</i> |
| 40 | AY423487.1 | <i>Opisthophthalmus carinatus</i> |
| 41 | JN315731.1 | <i>Pandinus cavimanus</i>         |
| 42 | JN315728.1 | <i>Pandinus cavimanus</i>         |
| 43 | AJ292361.1 | <i>Pandinus imperator</i>         |
| 44 | AY740694.1 | <i>Tityus costatus</i>            |
| 45 | AY740695.1 | <i>Tityus costatus</i>            |
| 46 | DQ465349.1 | <i>Tityus costatus</i>            |
| 47 | DQ465348.1 | <i>Tityus discrepans</i>          |
| 48 | DQ465347.1 | <i>Tityus discrepans</i>          |
| 49 | JX467683.1 | <i>Tityus stigmurus</i>           |
| 50 | DQ465345.1 | <i>Tityus trivittatus</i>         |
| 51 | DQ465346.1 | <i>Tityus trivittatus</i>         |
| 52 | EU089740.1 | <i>Tityus trivittatus</i>         |
| 53 | JX274244.1 | <i>Urodacus yaschenkoi</i>        |
| 54 | JX274245.1 | <i>Urodacus yaschenkoi</i>        |

**Table S3: Sequences Analyzed**

| Long KTx |                |                                  |
|----------|----------------|----------------------------------|
| 1        | GALL01000013.1 | <i>Lychas buchari</i>            |
| 2        | GALK01000012.1 | <i>Isometroides vescus</i>       |
| 3        | GALL01000014.1 | <i>Lychas buchari</i>            |
| 4        | GALL01000015.1 | <i>Lychas buchari</i>            |
| 5        | GALL01000016.1 | <i>Lychas buchari</i>            |
| 6        | GALK01000013.1 | <i>Isometroides vescus</i>       |
| 7        | GALL01000017.1 | <i>Lychas buchari</i>            |
| 8        | GALL01000018.1 | <i>Lychas buchari</i>            |
| 9        | GALL01000019.1 | <i>Lychas buchari</i>            |
| 10       | GALK01000014.1 | <i>Isometroides vescus</i>       |
| 11       | S74733.1       | <i>Androctonus australis</i>     |
| 12       | AF151537.1     | <i>Buthus martensii</i>          |
| 13       | AF159974.1     | <i>Buthus martensii</i>          |
| 14       | AF208299.1     | <i>Buthus martensii</i>          |
| 15       | AF208300.1     | <i>Buthus martensii</i>          |
| 16       | AF247058.1     | <i>Buthus martensii</i>          |
| 17       | AJ277729.1     | <i>Buthus martensii</i>          |
| 18       | FJ360817.1     | <i>Buthus occitanus israelis</i> |
| 19       | FJ360831.1     | <i>Buthus occitanus israelis</i> |
| 20       | FJ360833.1     | <i>Buthus occitanus israelis</i> |
| 21       | FJ360837.1     | <i>Buthus occitanus israelis</i> |
| 22       | EU163848.1     | <i>Lychas mucronatus</i>         |
| 23       | EU163856.1     | <i>Lychas mucronatus</i>         |
| 24       | JX025015.1     | <i>Mesobuthus gibbosus</i>       |
| 25       | AF079062.1     | <i>Mesobuthus martensii</i>      |
| 26       | AY647145.1     | <i>Mesobuthus martensii</i>      |
| 27       | AY864195.1     | <i>Mesobuthus martensii</i>      |
| 28       | DQ132798.1     | <i>Mesobuthus martensii</i>      |
| 29       | JQ023128.1     | <i>Mesobuthus martensii</i>      |
| 30       | JQ023129.1     | <i>Mesobuthus martensii</i>      |
| 31       | JQ074234.1     | <i>Mesobuthus martensii</i>      |
| 32       | JQ074235.1     | <i>Mesobuthus martensii</i>      |
| 33       | AY740685.1     | <i>Tityus costatus</i>           |
| 34       | FJ360826.1     | <i>Buthus occitanus israelis</i> |
| 35       | FJ360832.1     | <i>Buthus occitanus israelis</i> |
| 36       | JN872636.1     | <i>Heterometrus laoticus</i>     |

**Table S3:** Sequences Analyzed

|    |            |                                  |
|----|------------|----------------------------------|
| 37 | HQ288192.1 | <i>Hottentotta judaicus</i>      |
| 38 | EU163855.1 | <i>Lychas mucronatus</i>         |
| 39 | AF276623.1 | <i>Mesobuthus eupeus</i>         |
| 40 | GU327370.1 | <i>Mesobuthus eupeus</i>         |
| 41 | JF719812.1 | <i>Mesobuthus eupeus</i>         |
| 42 | JX025013.1 | <i>Mesobuthus gibbosus</i>       |
| 43 | JX025014.1 | <i>Mesobuthus gibbosus</i>       |
| 44 | AF249746.1 | <i>Mesobuthus martensii</i>      |
| 45 | AF534113.1 | <i>Mesobuthus martensii</i>      |
| 46 | AY129234.1 | <i>Mesobuthus martensii</i>      |
| 47 | AF541980.1 | <i>Mesobuthus martensii</i>      |
| 48 | AF153692.1 | <i>Mesobuthus martensii</i>      |
| 49 | AF154634.1 | <i>Mesobuthus martensii</i>      |
| 50 | AF520910.1 | <i>Mesobuthus martensii</i>      |
| 51 | JF719810.1 | <i>Mesobuthus martensii</i>      |
| 52 | JQ074233.1 | <i>Mesobuthus martensii</i>      |
| 53 | U79579.1   | <i>Pandinus imperator</i>        |
| 54 | AJ277726.1 | <i>Mesobuthus martensii</i>      |
| 55 | AJ277727.1 | <i>Mesobuthus martensii</i>      |
| 56 | AF159975.1 | <i>Mesobuthus martensii</i>      |
| 57 | AF135817.1 | <i>Mesobuthus martensii</i>      |
| 58 | AF325113.1 | <i>Mesobuthus martensii</i>      |
| 59 | AJ277728.1 | <i>Mesobuthus martensii</i>      |
| 60 | AF135818.1 | <i>Mesobuthus martensii</i>      |
| 61 | AY730620.1 | <i>Mesobuthus martensii</i>      |
| 62 | HQ650828.1 | <i>Mesobuthus martensii</i>      |
| 63 | HQ650832.1 | <i>Mesobuthus martensii</i>      |
| 64 | HQ650829.1 | <i>Mesobuthus martensii</i>      |
| 65 | HQ650831.1 | <i>Mesobuthus martensii</i>      |
| 66 | HQ650830.1 | <i>Mesobuthus martensii</i>      |
| 67 | FJ360824.1 | <i>Buthus occitanus israelis</i> |
| 68 | AJ277730.1 | <i>Mesobuthus martensii</i>      |
| 69 | HQ650827.1 | <i>Mesobuthus eupeus</i>         |
| 70 | JQ781066.1 | <i>Mesobuthus martensii</i>      |
| 71 | HQ650826.1 | <i>Mesobuthus eupeus</i>         |
| 72 | JQ798184.1 | <i>Mesobuthus martensii</i>      |
| 73 | AF295594.1 | <i>Mesobuthus martensii</i>      |



**Table S3: Sequences Analyzed**

|    |            |                                  |
|----|------------|----------------------------------|
| 74 | JQ781065.1 | <i>Mesobuthus martensii</i>      |
| 75 | AF247057.1 | <i>Mesobuthus martensii</i>      |
| 76 | AY125328.1 | <i>Mesobuthus martensii</i>      |
| 77 | HQ288111.1 | <i>Hottentotta judaicus</i>      |
| 78 | JQ781064.1 | <i>Mesobuthus eupeus</i>         |
| 79 | AY125327.1 | <i>Mesobuthus martensii</i>      |
| 80 | FJ360823.1 | <i>Buthus occitanus israelis</i> |

| <b>Anionic</b> |                |                                  |
|----------------|----------------|----------------------------------|
| 1              | GALH01000001.1 | <i>Cercophonius squama</i>       |
| 2              | GALK01000002.1 | <i>Isometroides vescus</i>       |
| 3              | GALL01000002.1 | <i>Lychas buchari</i>            |
| 4              | GALL01000001.1 | <i>Lychas buchari</i>            |
| 5              | GALI01000002.1 | <i>Urodacus manicatus</i>        |
| 6              | FJ360842.1     | <i>Buthus occitanus israelis</i> |
| 7              | EF442043.1     | <i>Mesobuthus eupeus</i>         |
| 8              | EF442044.1     | <i>Mesobuthus eupeus</i>         |
| 9              | EF445058.1     | <i>Mesobuthus eupeus</i>         |
| 10             | EF445068.1     | <i>Mesobuthus eupeus</i>         |
| 11             | EF445090.1     | <i>Mesobuthus eupeus</i>         |
| 12             | AF150012.1     | <i>Mesobuthus martensii</i>      |
| 13             | AY648240.1     | <i>Mesobuthus martensii</i>      |
| 14             | JN315714.1     | <i>Pandinus cavimanus</i>        |
| 15             | AY740689.1     | <i>Tityus costatus</i>           |
| 16             | AY740690.1     | <i>Tityus costatus</i>           |
| 17             | AY740691.1     | <i>Tityus costatus</i>           |
| 18             | AY740692.1     | <i>Tityus costatus</i>           |
| 19             | FN392269.1     | <i>Tityus discrepans</i>         |
| 20             | GT028723.1     | <i>Lychas mucronatus</i>         |

| <b>Linear Peptides</b> |     |                              |
|------------------------|-----|------------------------------|
| 1                      | c21 | <i>Chaerilus tryznai</i>     |
| 2                      | c2  | <i>Chaerilus tricostatus</i> |
| 3                      | c30 | <i>Chaerilus tricostatus</i> |
| 4                      | c10 | <i>Chaerilus tricostatus</i> |
| 5                      | c65 | <i>Chaerilus tryznai</i>     |

**Table S3:** Sequences Analyzed

|    |                |                                        |
|----|----------------|----------------------------------------|
| 6  | c45            | <i>Chaerilus tricostatus</i>           |
| 7  | c64            | <i>Chaerilus tryznai</i>               |
| 8  | c54            | <i>Chaerilus tricostatus</i>           |
| 9  | c13            | <i>Chaerilus tryznai</i>               |
| 10 | c32            | <i>Chaerilus tryznai</i>               |
| 11 | GALH01000010.1 | <i>Cercophonius squama</i>             |
| 12 | GALH01000009.1 | <i>Cercophonius squama</i>             |
| 13 | GALH01000008.1 | <i>Cercophonius squama</i>             |
| 14 | GALI01000005.1 | <i>Urodacus manicatus</i>              |
| 15 | GALI01000004.1 | <i>Urodacus manicatus</i>              |
| 16 | GALI01000007.1 | <i>Urodacus manicatus</i>              |
| 17 | GALI01000006.1 | <i>Urodacus manicatus</i>              |
| 18 | GALI01000003.1 | <i>Urodacus manicatus</i>              |
| 19 | FJ360839.1     | <i>Buthus occitanus israelis</i>       |
| 20 | EF442055.1     | <i>Mesobuthus eupeus</i>               |
| 21 | EF445077.1     | <i>Mesobuthus eupeus</i>               |
| 22 | AF151795.1     | <i>Buthus martensii</i>                |
| 23 | AF150010.1     | <i>Buthus martensii</i>                |
| 24 | AY323830.1     | <i>Mesobuthus martensii</i>            |
| 25 | FM998743.1     | <i>Opisthacanthus cayaporum</i>        |
| 26 | FM998744.1     | <i>Opisthacanthus cayaporum</i>        |
| 27 | AF397895.1     | <i>Opisthacanthus madagascariensis</i> |
| 28 | AY050522.1     | <i>Opisthacanthus madagascariensis</i> |
| 29 | JN315745.1     | <i>Pandinus cavimanus</i>              |
| 30 | JX274240.1     | <i>Urodacus yaschenkoi</i>             |
| 31 | JX274241.1     | <i>Urodacus yaschenkoi</i>             |
| 32 | JX274242.1     | <i>Urodacus yaschenkoi</i>             |
| 33 | JQ086325.1     | <i>Vaejovis mexicanus</i>              |
| 34 | JQ086326.1     | <i>Vaejovis mexicanus</i>              |
| 35 | JQ086327.1     | <i>Vaejovis subcristatus</i>           |
| 36 | JQ086328.1     | <i>Vaejovis subcristatus</i>           |
| 37 | EF445102.1     | <i>Mesobuthus eupeus</i>               |
| 38 | EL698901.1     | <i>Hadrurus gertschi</i>               |
| 39 | FD664386.1     | <i>Scorpiops tibetanus</i>             |

| <b>AMPs</b> |                |                            |
|-------------|----------------|----------------------------|
| 1           | GALK01000015.1 | <i>Isometroides vescus</i> |

**Table S3:** Sequences Analyzed

|    |                |                                 |
|----|----------------|---------------------------------|
| 2  | GALL01000021.1 | <i>Lychas buchari</i>           |
| 3  | GALL01000022.1 | <i>Lychas buchari</i>           |
| 4  | c3             | <i>Chaerilus tricostatus</i>    |
| 5  | c5             | <i>Chaerilus tricostatus</i>    |
| 6  | c7             | <i>Chaerilus tricostatus</i>    |
| 7  | FR821613.1     | <i>Androctonus amoreuxi</i>     |
| 8  | FR821614.1     | <i>Androctonus amoreuxi</i>     |
| 9  | JN172934.1     | <i>Chaerilus tricostatus</i>    |
| 10 | FJ750949.1     | <i>Isometrus maculatus</i>      |
| 11 | EU163896.1     | <i>Lychas mucronatus</i>        |
| 12 | EU669864.1     | <i>Lychas mucronatus</i>        |
| 13 | DQ988344.1     | <i>Mesobuthus eupeus</i>        |
| 14 | EF445092.1     | <i>Mesobuthus eupeus</i>        |
| 16 | EF445103.1     | <i>Mesobuthus eupeus</i>        |
| 17 | HM235675.1     | <i>Mesobuthus eupeus</i>        |
| 18 | KC108907.1     | <i>Mesobuthus eupeus</i>        |
| 19 | AF159979.1     | <i>Mesobuthus martensii</i>     |
| 20 | AF543048.1     | <i>Mesobuthus martensii</i>     |
| 21 | AY700566.1     | <i>Mesobuthus martensii</i>     |
| 22 | AY729077.1     | <i>Mesobuthus martensii</i>     |
| 23 | DQ988345.1     | <i>Mesobuthus martensii</i>     |
| 24 | DQ988346.1     | <i>Mesobuthus martensii</i>     |
| 25 | DQ988347.1     | <i>Mesobuthus martensii</i>     |
| 26 | DQ988348.1     | <i>Mesobuthus martensii</i>     |
| 27 | EU158251.1     | <i>Mesobuthus martensii</i>     |
| 28 | HM235676.1     | <i>Mesobuthus martensii</i>     |
| 29 | HM235677.1     | <i>Mesobuthus martensii</i>     |
| 30 | HM235678.1     | <i>Mesobuthus martensii</i>     |
| 31 | FM998745.1     | <i>Opisthacanthus cayaporum</i> |
| 32 | FM998756.1     | <i>Opisthacanthus cayaporum</i> |
| 33 | FM998757.1     | <i>Opisthacanthus cayaporum</i> |
| 34 | JN315744.1     | <i>Pandinus cavimanus</i>       |
| 35 | AY740686.1     | <i>Tityus costatus</i>          |
| 36 | AY740687.1     | <i>Tityus costatus</i>          |
| 37 | AY740688.1     | <i>Tityus costatus</i>          |
| 38 | GT028819.1     | <i>Tityus costatus</i>          |
| 39 | GT028820.1     | <i>Tityus costatus</i>          |

**Table S3: Sequences Analyzed**

|    |            |                        |
|----|------------|------------------------|
| 40 | GT028840.1 | <i>Tityus costatus</i> |
| 41 | GT028857.1 | <i>Tityus costatus</i> |
| 42 | GT029142.1 | <i>Tityus costatus</i> |

| <b>Bradykinin Potentiating Peptide</b> |                |                                  |
|----------------------------------------|----------------|----------------------------------|
| 1                                      | GALK01000016.1 | <i>Isometroides vescus</i>       |
| 2                                      | GALK01000017.1 | <i>Isometroides vescus</i>       |
| 3                                      | c73            | <i>Chaerilus tricostatus</i>     |
| 4                                      | AF145952.1     | <i>Buthus martensii</i>          |
| 5                                      | AF145953.1     | <i>Buthus martensii</i>          |
| 6                                      | FJ360843.1     | <i>Buthus occitanus israelis</i> |
| 7                                      | EU163889.1     | <i>Lychas mucronatus</i>         |
| 8                                      | EU163895.1     | <i>Lychas mucronatus</i>         |
| 9                                      | EF442059.1     | <i>Mesobuthus eupeus</i>         |
| 10                                     | AF146744.1     | <i>Mesobuthus martensii</i>      |
| 11                                     | FM998759.1     | <i>Opisthacanthus cayaporum</i>  |
| 12                                     | FN392268.1     | <i>Tityus discrepans</i>         |
| 13                                     | JX274243.1     | <i>Urodacus yaschenkoi</i>       |
| 14                                     | HM102352.1     | <i>Vaejovis mexicanus</i>        |
| 15                                     | EL698903.1     | <i>Hadrurus gertschi</i>         |
| 16                                     | GT028786.1     | <i>Lychas mucronatus</i>         |

| <b>Glycine-rich Peptides</b> |                |                           |
|------------------------------|----------------|---------------------------|
| 1                            | GALL01000025.1 | <i>Lychas buchari</i>     |
| 2                            | GALI01000014.1 | <i>Urodacus manicatus</i> |
| 3                            | GALL01000026.1 | <i>Lychas buchari</i>     |
| 4                            | GALL01000024.1 | <i>Lychas buchari</i>     |
| 5                            | GALL01000027.1 | <i>Lychas buchari</i>     |
| 6                            | GT029007.1     | <i>Lychas mucronatus</i>  |

| <b>SV-SVCs</b> |                |                            |
|----------------|----------------|----------------------------|
| 1              | GALH01000011.1 | <i>Cercophonius squama</i> |
| 2              | GALH01000012.1 | <i>Cercophonius squama</i> |
| 3              | GALL01000029.1 | <i>Lychas buchari</i>      |
| 4              | GALL01000030.1 | <i>Lychas buchari</i>      |
| 5              | GALL01000028.1 | <i>Lychas buchari</i>      |

**Table S3: Sequences Analyzed**

|    |            |                                 |
|----|------------|---------------------------------|
| 6  | KC140563.1 | <i>Heterometrus spinifer</i>    |
| 7  | HQ288168.1 | <i>Hottentotta judaicus</i>     |
| 8  | HQ288209.1 | <i>Hottentotta judaicus</i>     |
| 9  | AF155366.1 | <i>Buthus martensii</i>         |
| 10 | DQ352540.1 | <i>Mesobuthus martensii</i>     |
| 11 | EF063687.1 | <i>Mesobuthus martensii</i>     |
| 12 | FM998753.1 | <i>Opisthacanthus cayaporum</i> |
| 13 | JN315721.1 | <i>Pandinus cavimanus</i>       |
| 14 | JX274246.1 | <i>Urodacus yaschenkoi</i>      |
| 15 | JX274247.1 | <i>Urodacus yaschenkoi</i>      |
| 16 | JX274250.1 | <i>Urodacus yaschenkoi</i>      |
| 17 | FM998779.1 | <i>Opisthacanthus cayaporum</i> |
| 18 | EF445086.1 | <i>Mesobuthus eupeus</i>        |
| 19 | GT029212.1 | <i>Lychas mucronatus</i>        |

| <b>ICKs</b> |                  |                                   |
|-------------|------------------|-----------------------------------|
| 1           | FJ360811.1       | <i>Buthus occitanus israelis</i>  |
| 2           | EU496812.1       | <i>Hadrurus gertschi</i>          |
| 3           | HQ288104.1       | <i>Hottentotta judaicus</i>       |
| 4           | EF445100.1       | <i>Mesobuthus eupeus</i>          |
| 5           | EF445101.1       | <i>Mesobuthus eupeus</i>          |
| 6           | DQ120790.1       | <i>Mesobuthus martensii</i>       |
| 7           | DQ206446.1       | <i>Mesobuthus martensii</i>       |
| 8           | DQ201205.1       | <i>Mesobuthus martensii</i>       |
| 9           | AF419253.2       | <i>Mesobuthus martensii</i>       |
| 10          | DQ272503.1       | <i>Mesobuthus martensii</i>       |
| 11          | AY225784.1       | <i>Opisthophthalmus carinatus</i> |
| 12          | GT029194.1       | <i>Lychas mucronatus</i>          |
| 13          | JX274248.1       | <i>Urodacus yaschenkoi</i>        |
| 14          | SRR398954.551300 | <i>Centruroides noxius</i>        |
| 15          | SRR398954.623832 | <i>Centruroides noxius</i>        |
| 16          | SRR402040.190746 | <i>Centruroides noxius</i>        |
| 17          | SRR402040.191590 | <i>Centruroides noxius</i>        |
| 18          | SRR402040.194225 | <i>Centruroides noxius</i>        |
| 19          | SRR402040.207425 | <i>Centruroides noxius</i>        |
| 20          | SRR402040.213790 | <i>Centruroides noxius</i>        |
| 21          | SRR402040.218195 | <i>Centruroides noxius</i>        |

**Table S3: Sequences Analyzed**

|    |                  |                            |
|----|------------------|----------------------------|
| 22 | SRR402040.220248 | <i>Centruroides noxius</i> |
| 23 | SRR402040.223783 | <i>Centruroides noxius</i> |
| 24 | SRR402040.243530 | <i>Centruroides noxius</i> |
| 25 | SRR402040.251500 | <i>Centruroides noxius</i> |
| 26 | SRR402040.254485 | <i>Centruroides noxius</i> |
| 27 | SRR402040.254935 | <i>Centruroides noxius</i> |
| 28 | SRR402040.254991 | <i>Centruroides noxius</i> |

| <b>DDH</b> |                |                                 |
|------------|----------------|---------------------------------|
| 1          | GALIO1000015.1 | <i>Urodacus manicatus</i>       |
| 2          | GALIO1000016.1 | <i>Urodacus manicatus</i>       |
| 3          | GALIO1000017.1 | <i>Urodacus manicatus</i>       |
| 4          | U1LITXLw1a     | <i>Liocheles waigiensis</i>     |
| 5          | FM998752.1     | <i>Opisthacanthus cayaporum</i> |

## Coleoids

| <b>Serine Protease</b> |                |                               |
|------------------------|----------------|-------------------------------|
| 1                      | GAGQ01000003.1 | <i>Sepia latimanus</i>        |
| 2                      | GAGP01000006.1 | <i>Sepia pharaonis</i>        |
| 3                      | GAGN01000013.1 | <i>Sepioteuthis australis</i> |
| 4                      | GBHH01001106.1 | <i>Euprymna scolopes</i>      |
| 5                      | GAGI01000019.1 | <i>Abdopus aculeatus</i>      |
| 6                      | GAGL01000008.1 | <i>Octopus cyanea</i>         |
| 7                      | GAGL01000009.1 | <i>Octopus cyanea</i>         |
| 8                      | GAGI01000008.1 | <i>Abdopus aculeatus</i>      |
| 9                      | GAGO01000005.1 | <i>Octopus kurna</i>          |
| 10                     | GAGJ01000006.1 | <i>Hapalochlaena maculosa</i> |
| 11                     | GAGM01000003.1 | <i>Pareledone turqueti</i>    |
| 12                     | GAGL01000010.1 | <i>Octopus cyanea</i>         |
| 13                     | GAGI01000024.1 | <i>Abdopus aculeatus</i>      |
| 14                     | GAGI01000015.1 | <i>Abdopus aculeatus</i>      |
| 15                     | GAGI01000014.1 | <i>Abdopus aculeatus</i>      |
| 16                     | GAGJ01000007.1 | <i>Hapalochlaena maculosa</i> |
| 17                     | GAGL01000007.1 | <i>Octopus cyanea</i>         |
| 18                     | GAGQ01000004.1 | <i>Sepia latimanus</i>        |

**Table S3: Sequences Analyzed**

|    |                |                               |
|----|----------------|-------------------------------|
| 19 | GAGI01000023.1 | <i>Abdopus aculeatus</i>      |
| 20 | GAGL01000006.1 | <i>Octopus cyanea</i>         |
| 21 | GAGI01000020.1 | <i>Abdopus aculeatus</i>      |
| 22 | GAGI01000016.1 | <i>Abdopus aculeatus</i>      |
| 23 | GAGI01000013.1 | <i>Abdopus aculeatus</i>      |
| 24 | GAGI01000025.1 | <i>Abdopus aculeatus</i>      |
| 25 | GAGP01000007.1 | <i>Sepia pharaonis</i>        |
| 26 | GAGM01000002.1 | <i>Pareledone turqueti</i>    |
| 27 | GAGQ01000002.1 | <i>Sepia latimanus</i>        |
| 28 | GAGI01000022.1 | <i>Abdopus aculeatus</i>      |
| 29 | GAGP01000005.1 | <i>Sepia pharaonis</i>        |
| 30 | GAGN01000012.1 | <i>Sepioteuthis australis</i> |
| 31 | GAGK01000006.1 | <i>Loliolus noctiluca</i>     |
| 32 | GAGN01000010.1 | <i>Sepioteuthis australis</i> |
| 33 | GAGN01000011.1 | <i>Euprymna scolopes</i>      |
| 34 | GBHH01004618.1 | <i>Euprymna scolopes</i>      |
| 35 | GAGI01000012.1 | <i>Abdopus aculeatus</i>      |
| 36 | GAGI01000018.1 | <i>Abdopus aculeatus</i>      |
| 37 | GAGI01000007.1 | <i>Abdopus aculeatus</i>      |
| 38 | GAGI01000009.1 | <i>Abdopus aculeatus</i>      |
| 39 | GAGI01000021.1 | <i>Abdopus aculeatus</i>      |
| 40 | GBHH01001371.1 | <i>Euprymna scolopes</i>      |
| 41 | GAGI01000017.1 | <i>Abdopus aculeatus</i>      |
| 42 | GAGI01000010.1 | <i>Abdopus aculeatus</i>      |
| 43 | GAGO01000004.1 | <i>Octopus kurna</i>          |
| 44 | GAGI01000011.1 | <i>Abdopus aculeatus</i>      |
| 45 | JR455425.1     | <i>Octopus vulgaris</i>       |
| 46 | JR440367.1     | <i>Octopus vulgaris</i>       |
| 47 | JR449946.1     | <i>Octopus vulgaris</i>       |
| 48 | JR448570.1     | <i>Octopus vulgaris</i>       |
| 49 | JR465628.1     | <i>Octopus vulgaris</i>       |

| <b>Pacifastin</b> |                |                               |
|-------------------|----------------|-------------------------------|
| 1                 | GAGP01000002.1 | <i>Sepia pharaonis</i>        |
| 2                 | GAGO01000003.1 | <i>Octopus kurna</i>          |
| 3                 | GAGN01000002.1 | <i>Sepioteuthis australis</i> |
| 4                 | GAGL01000002.1 | <i>Octopus cyanea</i>         |

**Table S3: Sequences Analyzed**

|    |                |                               |
|----|----------------|-------------------------------|
| 5  | GAGL01000003.1 | <i>Octopus cyanea</i>         |
| 6  | GAGL01000004.1 | <i>Octopus cyanea</i>         |
| 7  | GAGK01000002.1 | <i>Loliolus noctiluca</i>     |
| 8  | GAGJ01000004.1 | <i>Hapalochlaena maculosa</i> |
| 9  | GAGI01000002.1 | <i>Abdopus aculeatus</i>      |
| 10 | GAGI01000003.1 | <i>Abdopus aculeatus</i>      |
| 11 | GAGI01000004.1 | <i>Abdopus aculeatus</i>      |

| <b>CAP</b> |                |                               |
|------------|----------------|-------------------------------|
| 1          | JR439728.1     | <i>Octopus vulgaris</i>       |
| 2          | GBHH01002488.1 | <i>Euprymna scolopes</i>      |
| 3          | JR436131.1     | <i>Octopus vulgaris</i>       |
| 4          | JR447835.1     | <i>Octopus vulgaris</i>       |
| 5          | EU790590.1     | <i>Hapalochlaena maculosa</i> |

| <b>PLA2</b> |                |                               |
|-------------|----------------|-------------------------------|
| 1           | GAGN01000003.1 | <i>Sepioteuthis australis</i> |
| 2           | GAGK01000003.1 | <i>Loliolus noctiluca</i>     |
| 3           | EU790608.1     | <i>Sepia latimanus</i>        |
| 4           | GAGP01000003.1 | <i>Sepia pharaonis</i>        |
| 5           | GAGP00000000.1 | <i>Sepia pharaonis</i>        |

| <b>Kallikreins</b> |            |                                    |
|--------------------|------------|------------------------------------|
| 1                  | GU441497.1 | <i>Celestus warreni</i>            |
| 2                  | GU441498.1 | <i>Celestus warreni</i>            |
| 3                  | GU441502.1 | <i>Celestus warreni</i>            |
| 4                  | GU441495.1 | <i>Gerrhonotus infernalis</i>      |
| 5                  | GU441496.1 | <i>Gerrhonotus infernalis</i>      |
| 6                  | GU441503.1 | <i>Gerrhonotus infernalis</i>      |
| 7                  | EU790962.1 | <i>Heloderma suspectum cinctum</i> |
| 8                  | EU790963.1 | <i>Heloderma suspectum cinctum</i> |
| 9                  | EU195456.1 | <i>Varanus komodoensis</i>         |
| 10                 | EU195457.1 | <i>Varanus komodoensis</i>         |
| 11                 | EU195458.1 | <i>Varanus komodoensis</i>         |
| 12                 | DQ139926.1 | <i>Varanus varius</i>              |
| 13                 | HM437246.1 | <i>Heloderma horridum</i>          |



**Table S3:** Sequences Analyzed

|    |            |                           |
|----|------------|---------------------------|
| 14 | DQ139911.1 | <i>Varanus acanthurus</i> |
| 15 | DQ139912.1 | <i>Varanus acanthurus</i> |
| 16 | DQ139913.1 | <i>Varanus acanthurus</i> |
| 17 | DQ139914.1 | <i>Varanus acanthurus</i> |
| 18 | GU441504.1 | <i>Varanus eremius</i>    |
| 19 | GU441494.1 | <i>Varanus giganteus</i>  |
| 20 | GU441480.1 | <i>Varanus gilleni</i>    |
| 21 | GU441481.1 | <i>Varanus glauerti</i>   |
| 22 | GU441487.1 | <i>Varanus glauerti</i>   |
| 23 | GU441478.1 | <i>Varanus gouldii</i>    |
| 24 | GU441483.1 | <i>Varanus gouldii</i>    |
| 25 | GU441485.1 | <i>Varanus gouldii</i>    |
| 26 | GU441489.1 | <i>Varanus gouldii</i>    |
| 27 | GU441492.1 | <i>Varanus gouldii</i>    |
| 28 | GU441479.1 | <i>Varanus indicus</i>    |
| 29 | GU441482.1 | <i>Varanus indicus</i>    |
| 30 | GU441484.1 | <i>Varanus mertensi</i>   |
| 31 | DQ139915.1 | <i>Varanus mitchelli</i>  |
| 32 | DQ139916.1 | <i>Varanus mitchelli</i>  |
| 33 | DQ139917.1 | <i>Varanus mitchelli</i>  |
| 34 | DQ139918.1 | <i>Varanus mitchelli</i>  |
| 35 | GU441490.1 | <i>Varanus panoptes</i>   |
| 36 | GU441493.1 | <i>Varanus panoptes</i>   |
| 37 | GU441500.1 | <i>Varanus panoptes</i>   |
| 38 | GU441501.1 | <i>Varanus panoptes</i>   |
| 39 | DQ139924.1 | <i>Varanus panoptes</i>   |
| 40 | DQ139925.1 | <i>Varanus panoptes</i>   |
| 41 | DQ184481.1 | <i>Varanus panoptes</i>   |
| 42 | GU441477.1 | <i>Varanus scalaris</i>   |
| 43 | GU441486.1 | <i>Varanus scalaris</i>   |
| 44 | GU441491.1 | <i>Varanus scalaris</i>   |
| 45 | GU441499.1 | <i>Varanus scalaris</i>   |
| 46 | GU441488.1 | <i>Varanus tristis</i>    |

**Toxicofera Lizards****CRiSPs**

**Table S3: Sequences Analyzed**

|    |            |                               |
|----|------------|-------------------------------|
| 1  | GU441473.1 | <i>Celestus warreni</i>       |
| 2  | GU441472.1 | <i>Gerrhonotus infernalis</i> |
| 3  | U13619.1   | <i>Heloderma horridum</i>     |
| 4  | EU790958.1 | <i>Heloderma suspectum</i>    |
| 5  | GU441462.1 | <i>Ophisaurus apodus</i>      |
| 6  | DQ139883.1 | <i>Varanus acanthurus</i>     |
| 7  | DQ139884.1 | <i>Varanus acanthurus</i>     |
| 8  | DQ139885.1 | <i>Varanus acanthurus</i>     |
| 9  | DQ139886.1 | <i>Varanus acanthurus</i>     |
| 10 | DQ139887.1 | <i>Varanus acanthurus</i>     |
| 11 | DQ139888.1 | <i>Varanus acanthurus</i>     |
| 12 | GU441466.1 | <i>Varanus giganteus</i>      |
| 13 | GU441467.1 | <i>Varanus gilleni</i>        |
| 14 | GU441465.1 | <i>Varanus gouldii</i>        |
| 15 | GU441469.1 | <i>Varanus indicus</i>        |
| 16 | GU441470.1 | <i>Varanus indicus</i>        |
| 17 | EU195455.1 | <i>Varanus komodoensis</i>    |
| 18 | GU441463.1 | <i>Varanus mertensi</i>       |
| 19 | GU441464.1 | <i>Varanus panoptes</i>       |
| 20 | GU441471.1 | <i>Varanus scalaris</i>       |
| 21 | GU441468.1 | <i>Varanus tristis</i>        |
| 22 | DQ139903.1 | <i>Varanus varius</i>         |
| 23 | DQ139904.1 | <i>Varanus varius</i>         |

| <b>Crotamine</b> |            |                         |
|------------------|------------|-------------------------|
| 1                | JX467135.1 | <i>Varanus tristis</i>  |
| 2                | JX467134.1 | <i>Varanus glauerti</i> |
| 3                | JX467133.1 | <i>Varanus glauerti</i> |
| 4                | JX467132.1 | <i>Varanus glauerti</i> |
| 5                | JX467131.1 | <i>Varanus glauerti</i> |

| <b>PLA2</b> |            |                            |
|-------------|------------|----------------------------|
| 1           | GU441525.1 | <i>Celestus warreni</i>    |
| 2           | EU790968.1 | <i>Heloderma suspectum</i> |
| 3           | EU790967.1 | <i>Heloderma suspectum</i> |
| 4           | EU195460.1 | <i>Varanus komodoensis</i> |

**Table S3: Sequences Analyzed**

|   |            |                       |
|---|------------|-----------------------|
| 5 | DQ139930.1 | <i>Varanus varius</i> |
|---|------------|-----------------------|

| <b>Natriuretic peptides</b> |            |                               |
|-----------------------------|------------|-------------------------------|
| 1                           | GU441511.1 | <i>Celestus warreni</i>       |
| 2                           | GU441510.1 | <i>Gerrhonotus infernalis</i> |
| 3                           | FN555307.1 | <i>Heloderma suspectum</i>    |
| 4                           | FN555308.1 | <i>Heloderma suspectum</i>    |
| 5                           | EU790965.1 | <i>Heloderma suspectum</i>    |
| 6                           | EU195461.1 | <i>Varanus komodoensis</i>    |
| 7                           | DQ139927.1 | <i>Varanus varius</i>         |
| 8                           | FR666707.1 | <i>Heloderma horridum</i>     |
| 9                           | GU441507.1 | <i>Varanus glauerti</i>       |
| 10                          | GU441509.1 | <i>Varanus glauerti</i>       |
| 11                          | GU441508.1 | <i>Varanus scalaris</i>       |

| <b>NGF</b> |            |                                 |
|------------|------------|---------------------------------|
| 1          | GU432718.1 | <i>Anniella pulchra</i>         |
| 2          | GU432725.1 | <i>Lanthanotus borneensis</i>   |
| 3          | GU432719.1 | <i>Celestus enneagrammus</i>    |
| 4          | GU432720.1 | <i>Elgaria multicarinata</i>    |
| 5          | GU432722.1 | <i>Heloderma suspectum</i>      |
| 6          | EU790966.1 | <i>Heloderma suspectum</i>      |
| 7          | GU432721.1 | <i>Heloderma horridum</i>       |
| 8          | JN880631.1 | <i>Ophisaurus ventralis</i>     |
| 9          | GU432717.1 | <i>Ophisaurus apodus</i>        |
| 10         | GU432723.1 | <i>Shinisaurus crocodilurus</i> |
| 11         | GU432726.1 | <i>Varanus acanthurus</i>       |
| 12         | GU432727.1 | <i>Varanus exanthematicus</i>   |
| 13         | EU437981.1 | <i>Varanus salvator</i>         |
| 14         | GU432724.1 | <i>Xenosaurus grandis</i>       |
| 15         | EU437980.1 | <i>Xenosaurus platyceps</i>     |
| 16         | c474       | <i>Abronia gramminea</i>        |
| 17         | c785       | <i>Abronia gramminea</i>        |
| 18         | c662       | <i>Heloderma suspectum</i>      |

**Table S3: Sequences Analyzed  
Cone Snails**

| Conantokin |                    |                         |
|------------|--------------------|-------------------------|
| 1          | HIJWH8M02JZ00K_4_1 | <i>Conus geographus</i> |
| 2          | HIJWH8M02JZY6C_5_1 | <i>Conus geographus</i> |
| 3          | HIJWH8M02JWH4L_4_1 | <i>Conus geographus</i> |
| 4          | HIJWH8M02JZTPJ_3_1 | <i>Conus geographus</i> |
| 5          | HIJWH8M02JYV8Q_5_1 | <i>Conus geographus</i> |
| 6          | HIJWH8M02JQSU9_2_1 | <i>Conus geographus</i> |
| 7          | HIJWH8M02JZL2R_3_1 | <i>Conus geographus</i> |
| 8          | HIJWH8M02JVRF5_5_1 | <i>Conus geographus</i> |
| 9          | HIJWH8M02JWHZU_5_1 | <i>Conus geographus</i> |
| 10         | HIJWH8M02JUJHO_6_1 | <i>Conus geographus</i> |
| 11         | HIJWH8M02IWKVZ_2_1 | <i>Conus geographus</i> |
| 12         | HIJWH8M02JN0T3_1_1 | <i>Conus geographus</i> |
| 13         | HIJWH8M02J2J5H_3_1 | <i>Conus geographus</i> |
| 14         | HIJWH8M02JW2O3_2_1 | <i>Conus geographus</i> |
| 15         | HIJWH8M02JUPBO_2_1 | <i>Conus geographus</i> |
| 16         | HIJWH8M02JQHGY_3_1 | <i>Conus geographus</i> |
| 17         | HIJWH8M02JN798_1_1 | <i>Conus geographus</i> |
| 18         | HIJWH8M02JYPH7_2_1 | <i>Conus geographus</i> |
| 19         | HIJWH8M02JHGRC_3_1 | <i>Conus geographus</i> |
| 20         | HIJWH8M02JQ65A_2_1 | <i>Conus geographus</i> |
| 21         | HIJWH8M02JH9RL_3_1 | <i>Conus geographus</i> |
| 22         | HIJWH8M02IRS71_1_1 | <i>Conus geographus</i> |
| 23         | HIJWH8M02HY32M_2_1 | <i>Conus geographus</i> |
| 24         | HIJWH8M02IWI7P_5_1 | <i>Conus geographus</i> |
| 25         | HIJWH8M02JT0TA_2_1 | <i>Conus geographus</i> |
| 26         | HIJWH8M02JOZ5U_2_1 | <i>Conus geographus</i> |
| 27         | HIJWH8M02JPBU0_3_1 | <i>Conus geographus</i> |
| 28         | HIJWH8M01EX5AU_3_1 | <i>Conus geographus</i> |
| 29         | HIJWH8M02HOXYU_3_1 | <i>Conus geographus</i> |
| 30         | HIJWH8M02JL4BI_5_1 | <i>Conus geographus</i> |
| 31         | HIJWH8M02IRZ46_2_1 | <i>Conus geographus</i> |
| 32         | HIJWH8M02H7N7W_2_1 | <i>Conus geographus</i> |
| 33         | HIJWH8M02ISVZM_6_1 | <i>Conus geographus</i> |
| 34         | HIJWH8M02IXJV0_2_1 | <i>Conus geographus</i> |
| 35         | HIJWH8M02IMO1R_5_1 | <i>Conus geographus</i> |

**Table S3:** Sequences Analyzed

|    |                    |                         |
|----|--------------------|-------------------------|
| 36 | HIJWH8M02JTUOA_1_1 | <i>Conus geographus</i> |
| 37 | HIJWH8M02JZZC9_2_1 | <i>Conus geographus</i> |
| 38 | HIJWH8M02JWYBC_2_1 | <i>Conus geographus</i> |
| 39 | HIJWH8M02IYO90_3_1 | <i>Conus geographus</i> |
| 40 | HIJWH8M02FPBPC_5_1 | <i>Conus geographus</i> |
| 41 | HIJWH8M02JLQ01_5_1 | <i>Conus geographus</i> |
| 42 | HIJWH8M02G9XU3_5_1 | <i>Conus geographus</i> |
| 43 | HIJWH8M02JJM5X_6_1 | <i>Conus geographus</i> |
| 44 | HIJWH8M02JOWWR_5_1 | <i>Conus geographus</i> |
| 45 | HIJWH8M02GX0E3_4_1 | <i>Conus geographus</i> |
| 46 | HIJWH8M02JPKQ0_2_1 | <i>Conus geographus</i> |
| 47 | HIJWH8M02ITOJZ_2_1 | <i>Conus geographus</i> |
| 48 | HIJWH8M02JQ5TT_1_1 | <i>Conus geographus</i> |
| 49 | HIJWH8M02JW6I0_2_1 | <i>Conus geographus</i> |
| 50 | HIJWH8M02JJ3ZQ_6_1 | <i>Conus geographus</i> |
| 51 | HIJWH8M02F4O00_3_1 | <i>Conus geographus</i> |
| 52 | HIJWH8M02IYKWA_6_1 | <i>Conus geographus</i> |
| 53 | HIJWH8M02H5RUX_2_1 | <i>Conus geographus</i> |
| 54 | HIJWH8M02HH3YM_3_1 | <i>Conus geographus</i> |
| 55 | HIJWH8M01DANIJ_4_1 | <i>Conus geographus</i> |
| 56 | HIJWH8M02J3VJZ_6_1 | <i>Conus geographus</i> |
| 57 | HIJWH8M02JE1Y3_4_1 | <i>Conus geographus</i> |
| 58 | HIJWH8M02GVNGD_4_1 | <i>Conus geographus</i> |
| 59 | HIJWH8M02H2ZHK_3_1 | <i>Conus geographus</i> |
| 60 | HIJWH8M02J6W77_6_1 | <i>Conus geographus</i> |
| 61 | HIJWH8M02JZ6JI_1_1 | <i>Conus geographus</i> |
| 62 | HIJWH8M02HZDVQ_6_1 | <i>Conus geographus</i> |
| 63 | HIJWH8M02HOKSN_3_1 | <i>Conus geographus</i> |
| 64 | HIJWH8M02IHAMG_6_1 | <i>Conus geographus</i> |
| 65 | HIJWH8M02GVQ61_1_1 | <i>Conus geographus</i> |
| 66 | HIJWH8M02HAQ0W_3_1 | <i>Conus geographus</i> |
| 67 | HIJWH8M02IFQWF_2_1 | <i>Conus geographus</i> |
| 68 | HIJWH8M02IRQFU_3_1 | <i>Conus geographus</i> |
| 69 | HIJWH8M02HLE0L_1_1 | <i>Conus geographus</i> |
| 70 | HIJWH8M02GSJGP_3_1 | <i>Conus geographus</i> |
| 71 | HIJWH8M02FTO4C_5_1 | <i>Conus geographus</i> |
| 72 | HIJWH8M02JSZZ4_4_1 | <i>Conus geographus</i> |

**Table S3:** Sequences Analyzed

|     |                    |                         |
|-----|--------------------|-------------------------|
| 73  | HIJWH8M02IHW37_6_1 | <i>Conus geographus</i> |
| 74  | HIJWH8M02IRM9D_2_2 | <i>Conus geographus</i> |
| 75  | HIJWH8M02J04CO_3_1 | <i>Conus geographus</i> |
| 76  | HIJWH8M02HJ2MK_2_1 | <i>Conus geographus</i> |
| 77  | HIJWH8M02FSV8H_6_1 | <i>Conus geographus</i> |
| 78  | HIJWH8M01BM18Z_1_1 | <i>Conus geographus</i> |
| 79  | HIJWH8M02HBRBA_5_1 | <i>Conus geographus</i> |
| 80  | HIJWH8M01BKO42_6_1 | <i>Conus geographus</i> |
| 81  | HIJWH8M02JTQ9G_5_1 | <i>Conus geographus</i> |
| 82  | HIJWH8M02JKK6W_6_1 | <i>Conus geographus</i> |
| 83  | HIJWH8M02I78GB_6_1 | <i>Conus geographus</i> |
| 84  | HIJWH8M02HR5GC_3_1 | <i>Conus geographus</i> |
| 85  | HIJWH8M02JX5IS_5_1 | <i>Conus geographus</i> |
| 86  | HIJWH8M01EI9RD_3_1 | <i>Conus geographus</i> |
| 87  | HIJWH8M02G729P_6_1 | <i>Conus geographus</i> |
| 88  | HIJWH8M02IGXAV_2_1 | <i>Conus geographus</i> |
| 89  | HIJWH8M02GP176_2_1 | <i>Conus geographus</i> |
| 90  | HIJWH8M02ILRS1_6_1 | <i>Conus geographus</i> |
| 91  | HIJWH8M01D66IO_2_1 | <i>Conus geographus</i> |
| 92  | HIJWH8M02GFTWE_5_1 | <i>Conus geographus</i> |
| 93  | HIJWH8M01EIB0P_6_1 | <i>Conus geographus</i> |
| 94  | HIJWH8M02I2LYI_4_1 | <i>Conus geographus</i> |
| 95  | HIJWH8M02HWIXJ_5_1 | <i>Conus geographus</i> |
| 96  | HIJWH8M02JB0AJ_3_1 | <i>Conus geographus</i> |
| 97  | HIJWH8M02JMAQX_1_1 | <i>Conus geographus</i> |
| 98  | HIJWH8M01CMI5D_4_1 | <i>Conus geographus</i> |
| 99  | HIJWH8M02JTZ3Y_6_1 | <i>Conus geographus</i> |
| 100 | HIJWH8M02H2DZT_5_1 | <i>Conus geographus</i> |
| 101 | HIJWH8M02GICRS_2_1 | <i>Conus geographus</i> |
| 102 | HIJWH8M02J2G48_2_1 | <i>Conus geographus</i> |
| 103 | HIJWH8M02GE1AU_2_1 | <i>Conus geographus</i> |
| 104 | HIJWH8M02GZRUE_2_1 | <i>Conus geographus</i> |
| 105 | HIJWH8M02HLFBP_1_1 | <i>Conus geographus</i> |
| 106 | HIJWH8M02ILHN9_2_1 | <i>Conus geographus</i> |
| 107 | HIJWH8M01DHTJJ_3_1 | <i>Conus geographus</i> |
| 108 | HIJWH8M02F2DCK_2_1 | <i>Conus geographus</i> |
| 109 | HIJWH8M01ESM17_3_1 | <i>Conus geographus</i> |

**Table S3:** Sequences Analyzed

|     |                    |                         |
|-----|--------------------|-------------------------|
| 110 | HIJWH8M02F1XM9_3_1 | <i>Conus geographus</i> |
| 111 | HIJWH8M02HOT76_4_1 | <i>Conus geographus</i> |
| 112 | HIJWH8M02IDTIP_2_1 | <i>Conus geographus</i> |
| 113 | HIJWH8M01C1FRS_3_1 | <i>Conus geographus</i> |
| 114 | HIJWH8M02JPJDK_6_1 | <i>Conus geographus</i> |
| 115 | HIJWH8M02GTGOJ_2_1 | <i>Conus geographus</i> |
| 116 | HIJWH8M01D8QNA_5_1 | <i>Conus geographus</i> |
| 117 | HIJWH8M02IEIA8_1_1 | <i>Conus geographus</i> |
| 118 | HIJWH8M01D7CL7_2_1 | <i>Conus geographus</i> |
| 119 | HIJWH8M01CYB9E_3_1 | <i>Conus geographus</i> |
| 120 | HIJWH8M02IQI30_3_1 | <i>Conus geographus</i> |
| 121 | HIJWH8M01DL110_2_1 | <i>Conus geographus</i> |
| 122 | HIJWH8M02H5V8K_3_1 | <i>Conus geographus</i> |
| 123 | HIJWH8M02HM8RI_5_1 | <i>Conus geographus</i> |
| 124 | HIJWH8M02IM2RC_5_1 | <i>Conus geographus</i> |
| 125 | HIJWH8M02ISGNS_4_1 | <i>Conus geographus</i> |
| 126 | HIJWH8M02F239K_5_1 | <i>Conus geographus</i> |
| 127 | HIJWH8M02JLE5E_3_1 | <i>Conus geographus</i> |
| 128 | HIJWH8M02FMRD3_4_1 | <i>Conus geographus</i> |
| 129 | HIJWH8M02H5UH1_4_1 | <i>Conus geographus</i> |
| 130 | HIJWH8M01DOZ67_4_1 | <i>Conus geographus</i> |
| 131 | HIJWH8M02HBM6Z_1_1 | <i>Conus geographus</i> |
| 132 | HIJWH8M02I4655_2_1 | <i>Conus geographus</i> |
| 133 | HIJWH8M02JAFJP_3_1 | <i>Conus geographus</i> |
| 134 | HIJWH8M02HZZ9W_6_1 | <i>Conus geographus</i> |
| 135 | HIJWH8M02JX1HW_2_1 | <i>Conus geographus</i> |
| 136 | HIJWH8M02GP32N_1_1 | <i>Conus geographus</i> |
| 137 | HIJWH8M01BC1XD_4_1 | <i>Conus geographus</i> |
| 138 | HIJWH8M02JGYKN_2_1 | <i>Conus geographus</i> |
| 139 | HIJWH8M02GIEV3_2_1 | <i>Conus geographus</i> |
| 140 | HIJWH8M02IJ1ZR_5_1 | <i>Conus geographus</i> |
| 141 | HIJWH8M02JB9ID_3_1 | <i>Conus geographus</i> |
| 142 | HIJWH8M02I8SKC_1_1 | <i>Conus geographus</i> |
| 143 | HIJWH8M02HVDXE_2_1 | <i>Conus geographus</i> |
| 144 | HIJWH8M02IRN0Y_2_1 | <i>Conus geographus</i> |
| 145 | HIJWH8M02I1VJW_2_1 | <i>Conus geographus</i> |
| 146 | HIJWH8M02ILAUJ_5_1 | <i>Conus geographus</i> |

**Table S3:** Sequences Analyzed

|     |                    |                         |
|-----|--------------------|-------------------------|
| 147 | HIJWH8M01DUR0U_1_1 | <i>Conus geographus</i> |
|-----|--------------------|-------------------------|

| <b>Conantokin</b> |                    |                         |
|-------------------|--------------------|-------------------------|
| 1                 | HIJWH8M02JZ53H_4_1 | <i>Conus geographus</i> |
| 2                 | HIJWH8M02JUHE8_6_1 | <i>Conus geographus</i> |
| 3                 | HIJWH8M02JVFOI_2_1 | <i>Conus geographus</i> |
| 4                 | HIJWH8M02JMP09_6_1 | <i>Conus geographus</i> |
| 5                 | HIJWH8M02JYX5W_2_1 | <i>Conus geographus</i> |
| 6                 | HIJWH8M02JDOQ5_2_1 | <i>Conus geographus</i> |
| 7                 | HIJWH8M02IMK9O_1_1 | <i>Conus geographus</i> |
| 8                 | HIJWH8M02G92XD_2_1 | <i>Conus geographus</i> |
| 9                 | HIJWH8M02I1UQD_3_1 | <i>Conus geographus</i> |
| 10                | HIJWH8M02JYCIV_4_1 | <i>Conus geographus</i> |
| 11                | HIJWH8M01D23V2_3_1 | <i>Conus geographus</i> |
| 12                | HIJWH8M02JF6DY_2_1 | <i>Conus geographus</i> |

| <b>Conkunitzin</b> |                    |                         |
|--------------------|--------------------|-------------------------|
| 1                  | HIJWH8M02JY6LH_4_1 | <i>Conus geographus</i> |
| 2                  | HIJWH8M02HWGOY_4_1 | <i>Conus geographus</i> |
| 3                  | HIJWH8M02II3NV_5_1 | <i>Conus geographus</i> |
| 4                  | HIJWH8M02HWWIH_1_1 | <i>Conus geographus</i> |
| 5                  | HIJWH8M02FOIG3_5_1 | <i>Conus geographus</i> |

| <b>Superfamily A</b> |                    |                         |
|----------------------|--------------------|-------------------------|
| 1                    | HIJWH8M02JYCPK_6_1 | <i>Conus geographus</i> |
| 2                    | HIJWH8M02JZNK0_5_1 | <i>Conus geographus</i> |
| 3                    | HIJWH8M02JZTN7_1_1 | <i>Conus geographus</i> |
| 4                    | HIJWH8M02JY1EC_2_1 | <i>Conus geographus</i> |
| 5                    | HIJWH8M02JYVSL_5_1 | <i>Conus geographus</i> |
| 6                    | HIJWH8M02JXOLN_1_1 | <i>Conus geographus</i> |
| 7                    | HIJWH8M02JSQEX_1_1 | <i>Conus geographus</i> |
| 8                    | HIJWH8M02JM6FO_2_1 | <i>Conus geographus</i> |
| 9                    | HIJWH8M02IWRMV_1_1 | <i>Conus geographus</i> |
| 10                   | HIJWH8M02JDP32_2_1 | <i>Conus geographus</i> |
| 11                   | HIJWH8M01EXBCF_1_1 | <i>Conus geographus</i> |
| 12                   | HIJWH8M02JCVT0_2_1 | <i>Conus geographus</i> |



**Table S3:** Sequences Analyzed

|    |                    |                         |
|----|--------------------|-------------------------|
| 13 | HIJWH8M02I43VE_1_1 | <i>Conus geographus</i> |
| 14 | HIJWH8M02HS8QE_2_1 | <i>Conus geographus</i> |
| 15 | HIJWH8M02JY9KT_5_1 | <i>Conus geographus</i> |
| 16 | HIJWH8M02JMHLB_5_1 | <i>Conus geographus</i> |
| 17 | HIJWH8M01EXA2I_1_1 | <i>Conus geographus</i> |
| 18 | HIJWH8M02I5SVC_4_1 | <i>Conus geographus</i> |
| 19 | HIJWH8M02G4ZHB_3_1 | <i>Conus geographus</i> |
| 20 | HIJWH8M02HA66L_3_1 | <i>Conus geographus</i> |
| 21 | HIJWH8M01CGKAI_6_1 | <i>Conus geographus</i> |
| 22 | HIJWH8M01D7WOQ_5_1 | <i>Conus geographus</i> |
| 23 | HIJWH8M01DYN2M_2_1 | <i>Conus geographus</i> |
| 24 | HIJWH8M02JCRL3_3_1 | <i>Conus geographus</i> |
| 25 | HIJWH8M02F5AIA_6_1 | <i>Conus geographus</i> |

| <b>Superfamily M</b> |                    |                         |
|----------------------|--------------------|-------------------------|
| 1                    | HIJWH8M02JZZ1H_3_1 | <i>Conus geographus</i> |
| 2                    | HIJWH8M02JZUEX_1_1 | <i>Conus geographus</i> |
| 3                    | HIJWH8M02I9APV_2_1 | <i>Conus geographus</i> |
| 4                    | HIJWH8M02JNO2W_1_1 | <i>Conus geographus</i> |
| 5                    | HIJWH8M02IFO8Q_2_1 | <i>Conus geographus</i> |
| 6                    | HIJWH8M02GHNNA_3_1 | <i>Conus geographus</i> |
| 7                    | HIJWH8M02IW7O0_2_1 | <i>Conus geographus</i> |
| 8                    | HIJWH8M02IL4VH_1_1 | <i>Conus geographus</i> |
| 9                    | HIJWH8M01EVIQZ_1_1 | <i>Conus geographus</i> |
| 10                   | HIJWH8M02JPCE2_3_1 | <i>Conus geographus</i> |
| 11                   | HIJWH8M02G3L2Y_1_1 | <i>Conus geographus</i> |
| 12                   | HIJWH8M02IP0VO_3_1 | <i>Conus geographus</i> |
| 13                   | HIJWH8M02JLLA6_4_1 | <i>Conus geographus</i> |
| 14                   | HIJWH8M02J5SK4_1_1 | <i>Conus geographus</i> |
| 15                   | HIJWH8M02JRLB1_3_1 | <i>Conus geographus</i> |
| 16                   | HIJWH8M02JZ8H6_1_1 | <i>Conus geographus</i> |
| 17                   | HIJWH8M02JW3PP_5_1 | <i>Conus geographus</i> |
| 18                   | HIJWH8M02I6SKI_3_1 | <i>Conus geographus</i> |
| 19                   | HIJWH8M02HPJVS_2_1 | <i>Conus geographus</i> |
| 20                   | HIJWH8M02FKRG6_3_1 | <i>Conus geographus</i> |
| 21                   | HIJWH8M02F4C30_2_1 | <i>Conus geographus</i> |
| 22                   | HIJWH8M02JJORL_3_1 | <i>Conus geographus</i> |

**Table S3: Sequences Analyzed**

|    |                    |                         |
|----|--------------------|-------------------------|
| 23 | HIJWH8M01EES7E_1_1 | <i>Conus geographus</i> |
| 24 | HIJWH8M02H5K2R_5_1 | <i>Conus geographus</i> |
| 25 | HIJWH8M02I14C7_3_1 | <i>Conus geographus</i> |
| 26 | HIJWH8M02G2UVI_1_1 | <i>Conus geographus</i> |
| 27 | HIJWH8M02I6CC7_3_1 | <i>Conus geographus</i> |
| 28 | HIJWH8M02GL5W7_3_1 | <i>Conus geographus</i> |
| 29 | HIJWH8M02I7NXV_1_1 | <i>Conus geographus</i> |
| 30 | HIJWH8M02JBFJ3_1_1 | <i>Conus geographus</i> |
| 31 | HIJWH8M01D1AHE_3_1 | <i>Conus geographus</i> |
| 32 | HIJWH8M02I52K5_2_1 | <i>Conus geographus</i> |
| 33 | HIJWH8M02IXQ27_2_1 | <i>Conus geographus</i> |
| 34 | HIJWH8M01D8DZ4_2_1 | <i>Conus geographus</i> |
| 35 | HIJWH8M02HAB0X_3_1 | <i>Conus geographus</i> |
| 36 | HIJWH8M02GUPT4_3_1 | <i>Conus geographus</i> |
| 37 | HIJWH8M02G19JV_1_1 | <i>Conus geographus</i> |
| 38 | HIJWH8M02GGN2L_2_1 | <i>Conus geographus</i> |
| 39 | HIJWH8M01EWPQ7_3_1 | <i>Conus geographus</i> |
| 40 | HIJWH8M02FX3F7_1_1 | <i>Conus geographus</i> |

| <b>Superfamily O1</b> |                    |                         |
|-----------------------|--------------------|-------------------------|
| 1                     | HIJWH8M02JZTHI_6_1 | <i>Conus geographus</i> |
| 2                     | HIJWH8M02JZK5W_3_1 | <i>Conus geographus</i> |
| 3                     | HIJWH8M02JVNEE_6_1 | <i>Conus geographus</i> |
| 4                     | HIJWH8M02JWJR3_6_1 | <i>Conus geographus</i> |
| 5                     | HIJWH8M02JAINF_5_1 | <i>Conus geographus</i> |
| 6                     | HIJWH8M02JG1TL_1_1 | <i>Conus geographus</i> |
| 7                     | HIJWH8M01EEV6S_1_1 | <i>Conus geographus</i> |
| 8                     | HIJWH8M02HBFST_6_1 | <i>Conus geographus</i> |
| 9                     | HIJWH8M02G875N_4_1 | <i>Conus geographus</i> |
| 10                    | HIJWH8M01EMW3Y_6_1 | <i>Conus geographus</i> |
| 11                    | HIJWH8M02IN5V7_4_1 | <i>Conus geographus</i> |
| 12                    | HIJWH8M02JYLQV_4_1 | <i>Conus geographus</i> |
| 13                    | HIJWH8M02JZDZO_3_1 | <i>Conus geographus</i> |
| 14                    | HIJWH8M02JCA7J_2_1 | <i>Conus geographus</i> |

|                       |
|-----------------------|
| <b>Superfamily O2</b> |
|-----------------------|

**Table S3: Sequences Analyzed**

|   |                    |                         |
|---|--------------------|-------------------------|
| 1 | HIJWH8M02INOZN_5_1 | <i>Conus geographus</i> |
| 2 | HIJWH8M02IA26Z_3_1 | <i>Conus geographus</i> |
| 3 | HIJWH8M02H2DBM_4_1 | <i>Conus geographus</i> |
| 4 | HIJWH8M02JXPBK_5_1 | <i>Conus geographus</i> |
| 5 | HIJWH8M01EPYIR_1_1 | <i>Conus geographus</i> |

| <b>Superfamily H</b> |                  |                        |
|----------------------|------------------|------------------------|
| 1                    | GQN8GVN01A4P6D_5 | <i>Conus marmoreus</i> |
| 2                    | GQN8GVN01BZIRB_6 | <i>Conus marmoreus</i> |
| 3                    | GQN8GVN01BEXD3_2 | <i>Conus marmoreus</i> |
| 4                    | GQN8GVN01BR1EH_5 | <i>Conus marmoreus</i> |

| <b>Superfamily I2</b> |                  |                        |
|-----------------------|------------------|------------------------|
| 1                     | GQN8GVN01B1USL_2 | <i>Conus marmoreus</i> |
| 2                     | GQN8GVN01EHT3W_6 | <i>Conus marmoreus</i> |
| 3                     | GQN8GVN01DUTWJ_1 | <i>Conus marmoreus</i> |
| 4                     | GP9D1AM02FSD58_5 | <i>Conus marmoreus</i> |
| 5                     | GQN8GVN01BRTG9_1 | <i>Conus marmoreus</i> |
| 6                     | GQN8GVN01DURZX_2 | <i>Conus marmoreus</i> |
| 7                     | GP9D1AM02G0HRD_3 | <i>Conus marmoreus</i> |
| 8                     | GQN8GVN01EHXYR_4 | <i>Conus marmoreus</i> |
| 9                     | GP9D1AM02JBC72_2 | <i>Conus marmoreus</i> |
| 10                    | GP9D1AM02JK2G3_2 | <i>Conus marmoreus</i> |

| <b>Superfamily M</b> |                  |                        |
|----------------------|------------------|------------------------|
| 1                    | GP9D1AM02J2AF2_2 | <i>Conus marmoreus</i> |
| 2                    | GQN8GVN01ASJRW_3 | <i>Conus marmoreus</i> |
| 3                    | GQN8GVN01BDVUB_1 | <i>Conus marmoreus</i> |
| 4                    | GQN8GVN01BMJ2S_5 | <i>Conus marmoreus</i> |
| 5                    | GQN8GVN01D2BF9_5 | <i>Conus marmoreus</i> |
| 6                    | GQN8GVN01CU573_2 | <i>Conus marmoreus</i> |
| 7                    | GQN8GVN01C3E2A_6 | <i>Conus marmoreus</i> |
| 8                    | GQN8GVN01A4DBM_1 | <i>Conus marmoreus</i> |
| 9                    | GP9D1AM02FRKX7_1 | <i>Conus marmoreus</i> |
| 10                   | GQN8GVN01BN1YV_4 | <i>Conus marmoreus</i> |
| 11                   | GQN8GVN01EQTDC_5 | <i>Conus marmoreus</i> |

**Table S3: Sequences Analyzed**

|    |                  |                        |
|----|------------------|------------------------|
| 12 | GP9D1AM02JRQ2O_5 | <i>Conus marmoreus</i> |
| 13 | GQN8GVN01BVSBZ_5 | <i>Conus marmoreus</i> |
| 14 | GQN8GVN01AU3E6_6 | <i>Conus marmoreus</i> |
| 15 | GQN8GVN01AOQWD_5 | <i>Conus marmoreus</i> |
| 16 | GP9D1AM02F5D0W_4 | <i>Conus marmoreus</i> |
| 17 | GQN8GVN01DY44H_1 | <i>Conus marmoreus</i> |
| 18 | GQN8GVN01DE1RJ_1 | <i>Conus marmoreus</i> |
| 19 | GP9D1AM02JUWP2_3 | <i>Conus marmoreus</i> |
| 20 | GP9D1AM02IPEH7_4 | <i>Conus marmoreus</i> |
| 21 | GP9D1AM02G808R_4 | <i>Conus marmoreus</i> |

| <b>Superfamily O1</b> |                  |                        |
|-----------------------|------------------|------------------------|
| 1                     | GQN8GVN01A2VRC_3 | <i>Conus marmoreus</i> |
| 2                     | GQN8GVN01DZMN1_4 | <i>Conus marmoreus</i> |
| 3                     | GQN8GVN01AN4X8_2 | <i>Conus marmoreus</i> |
| 4                     | GQN8GVN01CH6HM_4 | <i>Conus marmoreus</i> |
| 5                     | GQN8GVN01A0MAY_6 | <i>Conus marmoreus</i> |
| 6                     | GP9D1AM02F8EAM_3 | <i>Conus marmoreus</i> |
| 7                     | GQN8GVN01A775H_5 | <i>Conus marmoreus</i> |
| 8                     | GQN8GVN01AGGOV_4 | <i>Conus marmoreus</i> |
| 9                     | GQN8GVN01AMCDW_2 | <i>Conus marmoreus</i> |
| 10                    | GQN8GVN01A3WFQ_1 | <i>Conus marmoreus</i> |
| 11                    | GQN8GVN01DGPH6_2 | <i>Conus marmoreus</i> |
| 12                    | GQN8GVN01AMRDU_4 | <i>Conus marmoreus</i> |
| 13                    | GQN8GVN01DIO91_5 | <i>Conus marmoreus</i> |
| 14                    | GP9D1AM02GTD0A_3 | <i>Conus marmoreus</i> |

| <b>Superfamily O2</b> |                  |                        |
|-----------------------|------------------|------------------------|
| 1                     | GQN8GVN01CDX65_6 | <i>Conus marmoreus</i> |
| 2                     | GQN8GVN01D2F94_3 | <i>Conus marmoreus</i> |
| 3                     | GQN8GVN01ES8IP_1 | <i>Conus marmoreus</i> |
| 4                     | GQN8GVN01EEUS6_3 | <i>Conus marmoreus</i> |
| 5                     | GQN8GVN01ECY4L_6 | <i>Conus marmoreus</i> |
| 6                     | GQN8GVN01BV7HS_3 | <i>Conus marmoreus</i> |
| 7                     | GQN8GVN01B8474_1 | <i>Conus marmoreus</i> |
| 8                     | GQN8GVN01A9HDN_3 | <i>Conus marmoreus</i> |

**Table S3: Sequences Analyzed**

|    |                  |                        |
|----|------------------|------------------------|
| 9  | GQN8GVN01EO7KE_3 | <i>Conus marmoreus</i> |
| 10 | GQN8GVN01B89JR_2 | <i>Conus marmoreus</i> |

| <b>Superfamily T</b> |                  |                        |
|----------------------|------------------|------------------------|
| 1                    | GQN8GVN01DVA4R_1 | <i>Conus marmoreus</i> |
| 2                    | GQN8GVN01ENSOE_4 | <i>Conus marmoreus</i> |
| 3                    | GQN8GVN01DJ2AK_3 | <i>Conus marmoreus</i> |
| 4                    | GQN8GVN01CJJ3R_3 | <i>Conus marmoreus</i> |
| 5                    | GQN8GVN01DLQE1_6 | <i>Conus marmoreus</i> |
| 6                    | GQN8GVN01DFNB1_3 | <i>Conus marmoreus</i> |
| 7                    | GQN8GVN01BSLGW_3 | <i>Conus marmoreus</i> |
| 8                    | GQN8GVN01BVS05_3 | <i>Conus marmoreus</i> |
| 9                    | GP9D1AM02HWNIN_2 | <i>Conus marmoreus</i> |
| 10                   | GQN8GVN01AITBR_1 | <i>Conus marmoreus</i> |
| 11                   | GQN8GVN01ARITI_3 | <i>Conus marmoreus</i> |
| 12                   | GQN8GVN01AGW3M_6 | <i>Conus marmoreus</i> |

**Advanced Snakes**

| <b>CRiSPs</b> |            |                                 |
|---------------|------------|---------------------------------|
| 1             | EF599322.1 | <i>Austrelaps superbus</i>      |
| 2             | DQ917520.1 | <i>Demansia vestigiata</i>      |
| 3             | DQ084039.1 | <i>Hoplocephalus stephensii</i> |
| 4             | AF384220.1 | <i>Laticauda semifasciata</i>   |
| 5             | AY324325.1 | <i>Naja atra</i>                |
| 6             | AY261468.1 | <i>Naja atra</i>                |
| 7             | EU938340.1 | <i>Naja kaouthia</i>            |
| 8             | EU938339.1 | <i>Naja kaouthia</i>            |
| 9             | DQ084038.1 | <i>Notechis scutatus</i>        |
| 10            | AY299475.1 | <i>Ophiophagus hannah</i>       |
| 11            | AY181984.1 | <i>Ophiophagus hannah</i>       |
| 12            | FJ767755.1 | <i>Ophiophagus hannah</i>       |
| 13            | DQ084036.1 | <i>Oxyuranus microlepidotus</i> |
| 14            | DQ084035.1 | <i>Oxyuranus scutellatus</i>    |
| 15            | DQ139896.1 | <i>Oxyuranus microlepidotus</i> |

**Table S3: Sequences Analyzed**

|    |            |                                       |
|----|------------|---------------------------------------|
| 16 | AY072695.1 | <i>Pseudechis australis</i>           |
| 17 | AY072696.1 | <i>Pseudechis porphyriacus</i>        |
| 18 | DQ084037.1 | <i>Pseudonaja textilis</i>            |
| 19 | DQ917546.1 | <i>Tropidechis carinatus</i>          |
| 20 | DQ917547.1 | <i>Rhinoplocephalus nigrescens</i>    |
| 21 | AF384218.1 | <i>Agkistrodon blomhoffi</i>          |
| 22 | AY181982.1 | <i>Agkistrodon piscivorus</i>         |
| 23 | AY181983.1 | <i>Crotalus atrox</i>                 |
| 24 | DQ464263.1 | <i>Sistrurus catenatus</i>            |
| 25 | AF384219.1 | <i>Trimeresurus flavoviridis</i>      |
| 26 | AY261467.1 | <i>Trimeresurus jerdonii</i>          |
| 27 | AY423708.1 | <i>Trimeresurus stejnegeri</i>        |
| 28 | AM937250.1 | <i>Vipera berus</i>                   |
| 29 | GU065320.1 | <i>Cerberus rynchops</i>              |
| 30 | GU065319.1 | <i>Cerberus rynchops</i>              |
| 31 | GU065318.1 | <i>Cerberus rynchops</i>              |
| 32 | GU065317.1 | <i>Cerberus rynchops</i>              |
| 33 | DQ139891.1 | <i>Dispholidus typus</i>              |
| 34 | DQ139890.1 | <i>Dispholidus typus</i>              |
| 35 | DQ139891.1 | <i>Dispholidus typus</i>              |
| 36 | DQ139893.1 | <i>Enhydris polylepis</i>             |
| 37 | DQ139892.1 | <i>Enhydris polylepis</i>             |
| 38 | DQ139894.1 | <i>Leioheterodon madagascariensis</i> |
| 39 | DQ139895.1 | <i>Liophis poecilogyrus</i>           |
| 40 | DQ912659.1 | <i>Philodryas olfersii</i>            |
| 41 | DQ139898.1 | <i>Philodryas olfersii</i>            |
| 42 | DQ139897.1 | <i>Philodryas olfersii</i>            |
| 43 | AY093955.1 | <i>Rhabdophis tigrinus</i>            |
| 44 | DQ139899.1 | <i>Rhabdophis tigrinus</i>            |
| 45 | DQ139900.1 | <i>Telescopus dhara</i>               |
| 46 | DQ139901.1 | <i>Trimorphodon biscutatus</i>        |

| <b>SVMPs</b> |            |                               |
|--------------|------------|-------------------------------|
| 1            | AJ223283.1 | <i>Agkistrodon acutus</i>     |
| 2            | AJ223284.1 | <i>Agkistrodon acutus</i>     |
| 3            | U18233.1   | <i>Agkistrodon contortrix</i> |
| 4            | U18234.1   | <i>Agkistrodon contortrix</i> |

**Table S3:** Sequences Analyzed

|    |            |                                        |
|----|------------|----------------------------------------|
| 5  | AF212305.1 | <i>Agkistrodon contortrix</i>          |
| 6  | AB078904.1 | <i>Agkistrodon contortrix</i>          |
| 7  | U86634.1   | <i>Agkistrodon contortrix</i>          |
| 8  | FJ429179.1 | <i>Agkistrodon piscivorus</i>          |
| 9  | FJ429180.1 | <i>Agkistrodon piscivorus</i>          |
| 10 | AB078906.1 | <i>Agkistrodon piscivorus</i>          |
| 11 | AY885661.1 | <i>Bitis arietans</i>                  |
| 12 | AY442287.1 | <i>Bitis gabonica</i>                  |
| 13 | DQ247725.1 | <i>Bothrops asper</i>                  |
| 14 | DQ247726.1 | <i>Bothrops asper</i>                  |
| 15 | AF450503.1 | <i>Bothrops erythromelas</i>           |
| 16 | AF490533.1 | <i>Bothrops insularis</i>              |
| 17 | AY736107.1 | <i>Bothrops insularis</i>              |
| 18 | X68251.1   | <i>Bothrops jararaca</i>               |
| 19 | AF056025.2 | <i>Bothrops jararaca</i>               |
| 20 | AF345931.1 | <i>Bothrops jararaca</i>               |
| 21 | DQ375440.1 | <i>Bothrops jararaca</i>               |
| 22 | DQ375442.1 | <i>Bothrops jararaca</i>               |
| 23 | AY255005.1 | <i>Bothrops jararacussu</i>            |
| 24 | AF226274.1 | <i>Bothrops neuwiedi</i>               |
| 25 | L08780.1   | <i>Calloselasma rhodostoma</i>         |
| 26 | M89784.1   | <i>Crotalus atrox</i>                  |
| 27 | U01234.1   | <i>Crotalus atrox</i>                  |
| 28 | U01235.1   | <i>Crotalus atrox</i>                  |
| 29 | U01236.1   | <i>Crotalus atrox</i>                  |
| 30 | S77086.1   | <i>Crotalus atrox</i>                  |
| 31 | AB042840.1 | <i>Crotalus atrox</i>                  |
| 32 | AB257084.1 | <i>Crotalus atrox</i>                  |
| 33 | FJ654661.1 | <i>Crotalus durissus collilineatus</i> |
| 34 | DQ164402.1 | <i>Crotalus durissus durissus</i>      |
| 35 | DQ164403.1 | <i>Crotalus durissus durissus</i>      |
| 36 | DQ418751.1 | <i>Crotalus durissus durissus</i>      |
| 37 | DQ224420.1 | <i>Crotalus durissus terrificus</i>    |
| 38 | AF378288.1 | <i>Crotalus molossus molossus</i>      |
| 39 | AF378289.1 | <i>Crotalus molossus molossus</i>      |
| 40 | AF378290.1 | <i>Crotalus molossus molossus</i>      |
| 41 | AF378291.1 | <i>Crotalus molossus molossus</i>      |

**Table S3:** Sequences Analyzed

|    |            |                               |
|----|------------|-------------------------------|
| 42 | DQ137798.1 | <i>Daboia russelii</i>        |
| 43 | DQ137799.1 | <i>Daboia russelii</i>        |
| 44 | AF141379.1 | <i>Deinagkistrodon acutus</i> |
| 45 | AF162086.1 | <i>Deinagkistrodon acutus</i> |
| 46 | AF174391.1 | <i>Deinagkistrodon acutus</i> |
| 47 | AF174392.1 | <i>Deinagkistrodon acutus</i> |
| 48 | AF098309.1 | <i>Deinagkistrodon acutus</i> |
| 49 | AF098310.1 | <i>Deinagkistrodon acutus</i> |
| 50 | AF099085.1 | <i>Deinagkistrodon acutus</i> |
| 51 | AF099086.1 | <i>Deinagkistrodon acutus</i> |
| 52 | AF117636.1 | <i>Deinagkistrodon acutus</i> |
| 53 | AF117637.1 | <i>Deinagkistrodon acutus</i> |
| 54 | AY566610.1 | <i>Deinagkistrodon acutus</i> |
| 55 | DQ263750.1 | <i>Deinagkistrodon acutus</i> |
| 56 | D32212.1   | <i>Echis carinatus</i>        |
| 57 | AM039691.1 | <i>Echis ocellatus</i>        |
| 58 | AM039692.1 | <i>Echis ocellatus</i>        |
| 59 | AM039693.1 | <i>Echis ocellatus</i>        |
| 60 | AM039694.1 | <i>Echis ocellatus</i>        |
| 61 | AM039695.1 | <i>Echis ocellatus</i>        |
| 62 | AM039696.1 | <i>Echis ocellatus</i>        |
| 63 | AM039697.1 | <i>Echis ocellatus</i>        |
| 64 | AM039698.1 | <i>Echis ocellatus</i>        |
| 65 | AM039699.1 | <i>Echis ocellatus</i>        |
| 66 | AM039700.1 | <i>Echis ocellatus</i>        |
| 67 | AM039701.1 | <i>Echis ocellatus</i>        |
| 68 | AF367868.1 | <i>Gloydus halys</i>          |
| 69 | D28870.1   | <i>Gloydus halys</i>          |
| 70 | AF051787.1 | <i>Gloydus halys</i>          |
| 71 | AF051788.1 | <i>Gloydus halys</i>          |
| 72 | AF051789.1 | <i>Gloydus halys</i>          |
| 73 | AF051790.1 | <i>Gloydus halys</i>          |
| 74 | AY071905.1 | <i>Gloydus halys</i>          |
| 75 | DQ457057.1 | <i>Gloydus halys</i>          |
| 76 | AF284093.1 | <i>Gloydus halys</i>          |
| 77 | AY204244.1 | <i>Gloydus saxatilis</i>      |
| 78 | DQ444299.1 | <i>Gloydus shedaoensis</i>    |



**Table S3: Sequences Analyzed**

|     |            |                                     |
|-----|------------|-------------------------------------|
| 79  | AY204245.1 | <i>Gloydus ussuriensis</i>          |
| 80  | X97894.1   | <i>Macrovipera lebetina</i>         |
| 81  | AY339162.1 | <i>Macrovipera lebetina</i>         |
| 82  | AY835996.1 | <i>Macrovipera lebetina</i>         |
| 83  | AY835997.1 | <i>Macrovipera lebetina</i>         |
| 84  | AY987816.1 | <i>Macrovipera lebetina</i>         |
| 85  | AB848272.1 | <i>Ovophis okinavensis</i>          |
| 86  | AB984586.1 | <i>Protobothrops elegans</i>        |
| 87  | DQ464251.1 | <i>Sistrurus catenatus edwardsi</i> |
| 88  | AB059571.1 | <i>Trimeresurus elegans</i>         |
| 89  | AB059572.1 | <i>Trimeresurus elegans</i>         |
| 90  | AB051849.1 | <i>Trimeresurus flavoviridis</i>    |
| 91  | AB665726.1 | <i>Trimeresurus flavoviridis</i>    |
| 92  | AB848125.1 | <i>Trimeresurus flavoviridis</i>    |
| 93  | AB848126.1 | <i>Trimeresurus flavoviridis</i>    |
| 94  | AB985242.1 | <i>Trimeresurus flavoviridis</i>    |
| 95  | AY037808.1 | <i>Trimeresurus jerdonii</i>        |
| 96  | AB074143.1 | <i>Trimeresurus jerdonii</i>        |
| 97  | AB074144.1 | <i>Trimeresurus jerdonii</i>        |
| 98  | AB052155.1 | <i>Trimeresurus jerdonii</i>        |
| 99  | AY267902.1 | <i>Trimeresurus jerdonii</i>        |
| 100 | AY364231.1 | <i>Trimeresurus jerdonii</i>        |
| 101 | X77089.1   | <i>Trimeresurus jerdonii</i>        |
| 102 | X91190.1   | <i>Trimeresurus jerdonii</i>        |
| 103 | AF011909.1 | <i>Trimeresurus jerdonii</i>        |
| 104 | DQ464249.1 | <i>Trimeresurus jerdonii</i>        |
| 105 | DQ464254.1 | <i>Trimeresurus jerdonii</i>        |
| 106 | DQ464255.1 | <i>Trimeresurus jerdonii</i>        |
| 107 | X51530.1   | <i>Trimeresurus jerdonii</i>        |
| 108 | DQ195153.1 | <i>Trimeresurus jerdonii</i>        |
| 109 | DQ195154.1 | <i>Trimeresurus jerdonii</i>        |
| 110 | DQ335449.1 | <i>Trimeresurus jerdonii</i>        |
| 111 | KM886926.1 | <i>Vipera ammodytes ammodytes</i>   |

| <b>Cytotoxic 3FTx</b> |          |                  |
|-----------------------|----------|------------------|
| 1                     | U42585.1 | <i>Naja atra</i> |
| 2                     | U58487.1 | <i>Naja atra</i> |

**Table S3: Sequences Analyzed**

|    |            |                            |
|----|------------|----------------------------|
| 3  | U58486.1   | <i>Naja atra</i>           |
| 4  | U58488.2   | <i>Naja atra</i>           |
| 5  | AF031474.1 | <i>Naja atra</i>           |
| 6  | U42586.1   | <i>Naja atra</i>           |
| 7  | U58490.1   | <i>Naja atra</i>           |
| 8  | Z54230.1   | <i>Naja atra</i>           |
| 9  | U58481.1   | <i>Naja atra</i>           |
| 10 | Z54229.1   | <i>Naja atra</i>           |
| 11 | U58489.1   | <i>Naja atra</i>           |
| 12 | U58485.1   | <i>Naja atra</i>           |
| 13 | Y12491.1   | <i>Naja atra</i>           |
| 14 | AF031473.1 | <i>Naja atra</i>           |
| 15 | U58482.1   | <i>Naja atra</i>           |
| 16 | U42583.1   | <i>Naja atra</i>           |
| 17 | U58484.1   | <i>Naja atra</i>           |
| 18 | U77487.1   | <i>Naja atra</i>           |
| 19 | U58483.1   | <i>Naja atra</i>           |
| 20 | AF295330.1 | <i>Naja kaouthia</i>       |
| 21 | AF295119.1 | <i>Naja kaouthia</i>       |
| 22 | AJ007796.1 | <i>Naja naja</i>           |
| 23 | AJ007797.1 | <i>Naja naja</i>           |
| 24 | Y08727.1   | <i>Naja naja</i>           |
| 25 | X94316.1   | <i>Naja naja</i>           |
| 26 | X94317.1   | <i>Naja naja</i>           |
| 27 | Z54226.1   | <i>Naja naja</i>           |
| 28 | L04640.1   | <i>Naja naja sputatrix</i> |
| 29 | U86588.1   | <i>Naja sputatrix</i>      |
| 30 | U86593.1   | <i>Naja sputatrix</i>      |
| 31 | U86594.1   | <i>Naja sputatrix</i>      |
| 32 | U86589.1   | <i>Naja sputatrix</i>      |
| 33 | U86595.1   | <i>Naja sputatrix</i>      |
| 34 | U86591.1   | <i>Naja sputatrix</i>      |
| 35 | AF276222.1 | <i>Naja sputatrix</i>      |
| 36 | U86596.1   | <i>Naja sputatrix</i>      |
| 37 | U86597.1   | <i>Naja sputatrix</i>      |

|                   |            |                          |
|-------------------|------------|--------------------------|
| <b>Kappa 3FTx</b> |            |                          |
| 1                 | AY057872.1 | <i>Bungarus candidus</i> |

**Table S3: Sequences Analyzed**

|    |            |                              |
|----|------------|------------------------------|
| 2  | AY057873.1 | <i>Bungarus candidus</i>     |
| 3  | Y08721.1   | <i>Bungarus multicinctus</i> |
| 4  | Y12266.1   | <i>Bungarus multicinctus</i> |
| 5  | X51413.1   | <i>Bungarus multicinctus</i> |
| 6  | AJ223187.1 | <i>Bungarus multicinctus</i> |
| 7  | X51412.1   | <i>Bungarus multicinctus</i> |
| 8  | Y12265.1   | <i>Bungarus multicinctus</i> |
| 9  | GU190803.1 | <i>Bungarus flaviceps</i>    |
| 10 | Y11769.2   | <i>Bungarus multicinctus</i> |

| <b>Type I <math>\alpha</math>-neurotoxic 3FTx</b> |            |                               |
|---------------------------------------------------|------------|-------------------------------|
| 1                                                 | AB017928.1 | <i>Laticauda semifasciata</i> |
| 2                                                 | AB017929.1 | <i>Laticauda semifasciata</i> |
| 3                                                 | AB017930.1 | <i>Laticauda semifasciata</i> |
| 4                                                 | AB017931.1 | <i>Laticauda semifasciata</i> |
| 5                                                 | AB017932.1 | <i>Laticauda semifasciata</i> |
| 6                                                 | AB017933.1 | <i>Laticauda colubrina</i>    |
| 7                                                 | AB017934.1 | <i>Laticauda colubrina</i>    |
| 8                                                 | AB017935.1 | <i>Laticauda colubrina</i>    |
| 9                                                 | AB017936.1 | <i>Laticauda colubrina</i>    |
| 10                                                | AB017937.1 | <i>Laticauda colubrina</i>    |
| 11                                                | AB017938.1 | <i>Laticauda colubrina</i>    |
| 12                                                | AB017939.1 | <i>Laticauda colubrina</i>    |
| 13                                                | AB017940.1 | <i>Laticauda colubrina</i>    |
| 14                                                | AB017941.1 | <i>Laticauda colubrina</i>    |
| 15                                                | AB017942.1 | <i>Laticauda colubrina</i>    |
| 16                                                | AB017943.1 | <i>Laticauda colubrina</i>    |
| 17                                                | AB017944.1 | <i>Laticauda colubrina</i>    |
| 18                                                | AB017945.1 | <i>Laticauda colubrina</i>    |
| 19                                                | AB017946.1 | <i>Laticauda colubrina</i>    |
| 20                                                | AB017947.1 | <i>Laticauda colubrina</i>    |
| 21                                                | AB017949.1 | <i>Laticauda colubrina</i>    |
| 22                                                | AB017950.1 | <i>Laticauda colubrina</i>    |
| 23                                                | AB017951.1 | <i>Laticauda colubrina</i>    |
| 24                                                | AB017952.1 | <i>Laticauda colubrina</i>    |
| 25                                                | AB017953.1 | <i>Laticauda colubrina</i>    |
| 26                                                | AB017954.1 | <i>Laticauda colubrina</i>    |
| 27                                                | AB017955.1 | <i>Laticauda laticaudata</i>  |

**Table S3:** Sequences Analyzed

|    |            |                                    |
|----|------------|------------------------------------|
| 28 | AB017956.1 | <i>Laticauda laticaudata</i>       |
| 29 | AB017957.1 | <i>Laticauda laticaudata</i>       |
| 30 | AB017958.1 | <i>Laticauda laticaudata</i>       |
| 31 | AB017959.1 | <i>Laticauda laticaudata</i>       |
| 32 | AB017960.1 | <i>Laticauda laticaudata</i>       |
| 33 | AB017961.1 | <i>Laticauda laticaudata</i>       |
| 34 | AB017962.1 | <i>Laticauda laticaudata</i>       |
| 35 | AB017963.1 | <i>Laticauda laticaudata</i>       |
| 36 | AB017964.1 | <i>Laticauda laticaudata</i>       |
| 37 | AF023271.1 | <i>Naja sputatrix</i>              |
| 38 | AF023272.1 | <i>Naja sputatrix</i>              |
| 39 | AF031472.1 | <i>Naja atra</i>                   |
| 40 | AF068052.1 | <i>Naja naja</i>                   |
| 41 | AF088997.1 | <i>Naja naja</i>                   |
| 42 | AF088998.1 | <i>Naja naja</i>                   |
| 43 | AF159539.1 | <i>Lapemis hardwickii</i>          |
| 44 | AF159540.1 | <i>Lapemis hardwickii</i>          |
| 45 | AF161797.1 | <i>Naja atra</i>                   |
| 46 | AJ239050.1 | <i>Naja atra</i>                   |
| 47 | AY471578.1 | <i>Naja atra</i>                   |
| 48 | AY471579.1 | <i>Naja atra</i>                   |
| 49 | AY691664.1 | <i>Oxyuranus scutellatus</i>       |
| 50 | AY742211.1 | <i>Acalyptophis peroni</i>         |
| 51 | DQ066882.1 | <i>Naja kaouthia</i>               |
| 52 | DQ085855.1 | <i>Oxyuranus scutellatus</i>       |
| 53 | DQ917497.1 | <i>Oxyuranus microlepidotus</i>    |
| 54 | DQ917498.1 | <i>Pseudechis australis</i>        |
| 55 | DQ917499.1 | <i>Pseudechis porphyriacus</i>     |
| 56 | DQ917500.1 | <i>Tropidechis carinatus</i>       |
| 57 | DQ917501.1 | <i>Tropidechis carinatus</i>       |
| 58 | DQ917502.1 | <i>Rhinoplocephalus nigrescens</i> |
| 59 | DQ917503.1 | <i>Rhinoplocephalus nigrescens</i> |
| 60 | DQ917504.1 | <i>Hoplocephalus stephensii</i>    |
| 61 | DQ917505.1 | <i>Notechis scutatus</i>           |
| 62 | DQ917517.1 | <i>Demansia vestigiata</i>         |
| 63 | EF121774.1 | <i>Hydrophis cyanocinctus</i>      |
| 64 | EF405869.1 | <i>Lapemis hardwickii</i>          |
| 65 | EF405870.1 | <i>Lapemis hardwickii</i>          |
| 66 | EF599317.1 | <i>Austrelaps superbis</i>         |

**Table S3:** Sequences Analyzed

|     |                |                                 |
|-----|----------------|---------------------------------|
| 67  | EU003102.1     | <i>Austrelaps labialis</i>      |
| 68  | EU003103.1     | <i>Austrelaps labialis</i>      |
| 69  | EU029751.1     | <i>Oxyuranus microlepidotus</i> |
| 70  | EU029752.1     | <i>Oxyuranus microlepidotus</i> |
| 71  | EU196555.1     | <i>Walterinnesia aegyptia</i>   |
| 72  | FJ752480.1     | <i>Drysdalia coronoides</i>     |
| 73  | FJ752481.1     | <i>Drysdalia coronoides</i>     |
| 74  | FJ752482.1     | <i>Drysdalia coronoides</i>     |
| 75  | FJ752483.1     | <i>Drysdalia coronoides</i>     |
| 76  | FJ752484.1     | <i>Drysdalia coronoides</i>     |
| 77  | FJ752486.1     | <i>Drysdalia coronoides</i>     |
| 78  | FJ752487.1     | <i>Drysdalia coronoides</i>     |
| 79  | FJ752488.1     | <i>Drysdalia coronoides</i>     |
| 80  | FJ752489.1     | <i>Drysdalia coronoides</i>     |
| 81  | FJ752490.1     | <i>Drysdalia coronoides</i>     |
| 82  | FJ790447.1     | <i>Suta nigriceps</i>           |
| 83  | FJ790448.1     | <i>Suta nigriceps</i>           |
| 84  | FJ790449.1     | <i>Suta nigriceps</i>           |
| 85  | FJ790450.1     | <i>Suta nigriceps</i>           |
| 86  | FJ790451.1     | <i>Suta nigriceps</i>           |
| 87  | FJ790452.1     | <i>Suta nigriceps</i>           |
| 88  | FJ790454.1     | <i>Suta nigriceps</i>           |
| 89  | FJ790455.1     | <i>Suta nigriceps</i>           |
| 90  | GAHB01000003.1 | <i>Cacophis squamulosus</i>     |
| 91  | GAHB01000005.1 | <i>Cacophis squamulosus</i>     |
| 92  | GAHB01000006.1 | <i>Cacophis squamulosus</i>     |
| 93  | GAHB01000007.1 | <i>Cacophis squamulosus</i>     |
| 94  | GAHB01000008.1 | <i>Cacophis squamulosus</i>     |
| 95  | GAHF01000009.1 | <i>Hemiaspis signata</i>        |
| 96  | GAHF01000010.1 | <i>Hemiaspis signata</i>        |
| 97  | GAHF01000011.1 | <i>Hemiaspis signata</i>        |
| 98  | GAHF01000012.1 | <i>Hemiaspis signata</i>        |
| 99  | GAHF01000013.1 | <i>Hemiaspis signata</i>        |
| 100 | GAHF01000014.1 | <i>Hemiaspis signata</i>        |
| 101 | GAHJ01000011.1 | <i>Vermicella annulata</i>      |
| 102 | GAHJ01000012.1 | <i>Vermicella annulata</i>      |
| 103 | GAHJ01000013.1 | <i>Vermicella annulata</i>      |
| 104 | GAHJ01000014.1 | <i>Vermicella annulata</i>      |
| 105 | GAHJ01000015.1 | <i>Vermicella annulata</i>      |

**Table S3: Sequences Analyzed**

|     |                |                               |
|-----|----------------|-------------------------------|
| 106 | U42582.1       | <i>Naja atra</i>              |
| 107 | U58519.1       | <i>Naja atra</i>              |
| 108 | U58520.1       | <i>Naja atra</i>              |
| 109 | U58521.1       | <i>Naja atra</i>              |
| 110 | U77490.1       | <i>Naja atra</i>              |
| 111 | U77491.1       | <i>Naja atra</i>              |
| 112 | U77492.1       | <i>Naja atra</i>              |
| 113 | X02533.1       | <i>Laticauda semifasciata</i> |
| 114 | X13372.1       | <i>Aipysurus laevis</i>       |
| 115 | X13373.1       | <i>Aipysurus laevis</i>       |
| 116 | X16950.1       | <i>Laticauda semifasciata</i> |
| 117 | GAHA01000012.1 | <i>Simoselaps roperi</i>      |
| 118 | GAHA01000014.1 | <i>Simoselaps roperi</i>      |
| 119 | GAHA01000015.1 | <i>Simoselaps roperi</i>      |
| 120 | GAHA01000016.1 | <i>Simoselaps roperi</i>      |
| 121 | GAHA01000013.1 | <i>Simoselaps roperi</i>      |
| 122 | DQ902576.1     | <i>Ophiophagus hannah</i>     |
| 123 | AY354200.1     | <i>Ophiophagus hannah</i>     |

| <b>Type II <math>\alpha</math>-neurotoxic 3FTx</b> |            |                               |
|----------------------------------------------------|------------|-------------------------------|
| 1                                                  | AB015512.1 | <i>Laticauda semifasciata</i> |
| 2                                                  | AB015513.1 | <i>Laticauda semifasciata</i> |
| 3                                                  | AF026893.1 | <i>Naja sputatrix</i>         |
| 4                                                  | AF056400.1 | <i>Bungarus multicinctus</i>  |
| 5                                                  | AF056401.1 | <i>Bungarus multicinctus</i>  |
| 6                                                  | AF056402.1 | <i>Bungarus multicinctus</i>  |
| 7                                                  | AF056403.1 | <i>Bungarus multicinctus</i>  |
| 8                                                  | AF056404.1 | <i>Bungarus multicinctus</i>  |
| 9                                                  | AF056405.1 | <i>Bungarus multicinctus</i>  |
| 10                                                 | AF056406.1 | <i>Bungarus multicinctus</i>  |
| 11                                                 | AF056407.1 | <i>Bungarus multicinctus</i>  |
| 12                                                 | AF056408.1 | <i>Bungarus multicinctus</i>  |
| 13                                                 | AF056409.1 | <i>Bungarus multicinctus</i>  |
| 14                                                 | AF056410.1 | <i>Bungarus multicinctus</i>  |
| 15                                                 | AF056411.1 | <i>Bungarus multicinctus</i>  |
| 16                                                 | AF056412.1 | <i>Bungarus multicinctus</i>  |
| 17                                                 | AF056413.1 | <i>Bungarus multicinctus</i>  |
| 18                                                 | AF056414.1 | <i>Bungarus multicinctus</i>  |

**Table S3:** Sequences Analyzed

|    |            |                                 |
|----|------------|---------------------------------|
| 19 | AF056415.1 | <i>Bungarus multicinctus</i>    |
| 20 | AF056416.1 | <i>Bungarus multicinctus</i>    |
| 21 | AF056417.1 | <i>Bungarus multicinctus</i>    |
| 22 | AF082982.1 | <i>Pseudonaja textilis</i>      |
| 23 | AF142323.1 | <i>Bungarus multicinctus</i>    |
| 24 | AF159537.1 | <i>Lapemis hardwickii</i>       |
| 25 | AF159538.1 | <i>Lapemis hardwickii</i>       |
| 26 | AJ007766.1 | <i>Bungarus multicinctus</i>    |
| 27 | AY057874.1 | <i>Bungarus multicinctus</i>    |
| 28 | AY596926.1 | <i>Ophiophagus hannah</i>       |
| 29 | AY596927.1 | <i>Ophiophagus hannah</i>       |
| 30 | AY596928.1 | <i>Ophiophagus hannah</i>       |
| 31 | AY596929.1 | <i>Ophiophagus hannah</i>       |
| 32 | AY596930.1 | <i>Ophiophagus hannah</i>       |
| 33 | AY596932.1 | <i>Ophiophagus hannah</i>       |
| 34 | AY596933.1 | <i>Ophiophagus hannah</i>       |
| 35 | DQ273567.1 | <i>Ophiophagus hannah</i>       |
| 36 | DQ273568.1 | <i>Ophiophagus hannah</i>       |
| 37 | DQ273569.1 | <i>Ophiophagus hannah</i>       |
| 38 | DQ273570.1 | <i>Ophiophagus hannah</i>       |
| 39 | DQ273571.1 | <i>Ophiophagus hannah</i>       |
| 40 | DQ273572.1 | <i>Ophiophagus hannah</i>       |
| 41 | DQ902574.1 | <i>Ophiophagus hannah</i>       |
| 42 | DQ917508.1 | <i>Notechis scutatus</i>        |
| 43 | DQ917509.1 | <i>Tropidechis carinatus</i>    |
| 44 | DQ917510.1 | <i>Pseudechis australis</i>     |
| 45 | DQ917511.1 | <i>Pseudonaja textilis</i>      |
| 46 | DQ917512.1 | <i>Oxyuranus microlepidotus</i> |
| 47 | DQ917513.1 | <i>Oxyuranus microlepidotus</i> |
| 48 | DQ917514.1 | <i>Oxyuranus scutellatus</i>    |
| 49 | DQ917515.1 | <i>Demansia vestigiata</i>      |
| 50 | DQ917516.1 | <i>Demansia vestigiata</i>      |
| 51 | EF405871.1 | <i>Lapemis hardwickii</i>       |
| 52 | EF599318.1 | <i>Austrelaps superbus</i>      |
| 53 | EF599319.1 | <i>Austrelaps superbus</i>      |
| 54 | EU003085.1 | <i>Austrelaps labialis</i>      |
| 55 | EU003086.1 | <i>Austrelaps labialis</i>      |
| 56 | EU003087.1 | <i>Austrelaps labialis</i>      |
| 57 | EU003088.1 | <i>Austrelaps labialis</i>      |

**Table S3:** Sequences Analyzed

|    |                |                                 |
|----|----------------|---------------------------------|
| 58 | EU003089.1     | <i>Austrelaps labialis</i>      |
| 59 | EU003090.1     | <i>Austrelaps labialis</i>      |
| 60 | EU003091.1     | <i>Austrelaps labialis</i>      |
| 61 | EU003092.1     | <i>Austrelaps labialis</i>      |
| 62 | EU003093.1     | <i>Austrelaps labialis</i>      |
| 63 | EU003094.1     | <i>Austrelaps labialis</i>      |
| 64 | EU003095.1     | <i>Austrelaps labialis</i>      |
| 65 | EU003096.1     | <i>Austrelaps labialis</i>      |
| 66 | EU003097.1     | <i>Austrelaps labialis</i>      |
| 67 | EU003098.1     | <i>Austrelaps labialis</i>      |
| 68 | EU003101.1     | <i>Austrelaps labialis</i>      |
| 69 | EU029749.1     | <i>Oxyuranus microlepidotus</i> |
| 70 | EU029750.1     | <i>Oxyuranus microlepidotus</i> |
| 71 | FJ481928.1     | <i>Drysdalia coronoides</i>     |
| 72 | FJ752455.1     | <i>Drysdalia coronoides</i>     |
| 73 | FJ752456.1     | <i>Drysdalia coronoides</i>     |
| 74 | FJ752457.1     | <i>Drysdalia coronoides</i>     |
| 75 | FJ752458.1     | <i>Drysdalia coronoides</i>     |
| 76 | FJ752459.1     | <i>Drysdalia coronoides</i>     |
| 77 | FJ752460.1     | <i>Drysdalia coronoides</i>     |
| 78 | FJ752461.1     | <i>Drysdalia coronoides</i>     |
| 79 | FJ752462.1     | <i>Drysdalia coronoides</i>     |
| 80 | FJ752463.1     | <i>Drysdalia coronoides</i>     |
| 81 | FJ752464.1     | <i>Drysdalia coronoides</i>     |
| 82 | FJ752465.1     | <i>Drysdalia coronoides</i>     |
| 83 | FJ752466.1     | <i>Drysdalia coronoides</i>     |
| 84 | FJ752467.1     | <i>Drysdalia coronoides</i>     |
| 85 | FJ752468.1     | <i>Drysdalia coronoides</i>     |
| 86 | FJ752469.1     | <i>Drysdalia coronoides</i>     |
| 87 | FJ752470.1     | <i>Drysdalia coronoides</i>     |
| 88 | FJ790456.1     | <i>Suta nigriceps</i>           |
| 89 | FJ790457.1     | <i>Suta nigriceps</i>           |
| 90 | FJ952515.1     | <i>Ophiophagus hannah</i>       |
| 91 | GAGZ01000001.1 | <i>Acanthopphis wellsei</i>     |
| 92 | GAGZ01000002.1 | <i>Acanthopphis wellsei</i>     |
| 93 | GAGZ01000003.1 | <i>Acanthopphis wellsei</i>     |
| 94 | GAGZ01000004.1 | <i>Acanthopphis wellsei</i>     |
| 95 | GAGZ01000005.1 | <i>Acanthopphis wellsei</i>     |
| 96 | GAGZ01000006.1 | <i>Acanthopphis wellsei</i>     |



**Table S3: Sequences Analyzed**

|     |                |                            |
|-----|----------------|----------------------------|
| 97  | GAGZ01000007.1 | <i>Acanthophis wellsei</i> |
| 98  | GAGZ01000008.1 | <i>Acanthophis wellsei</i> |
| 99  | GAGZ01000009.1 | <i>Acanthophis wellsei</i> |
| 100 | GAGZ01000010.1 | <i>Acanthophis wellsei</i> |
| 101 | GAHA01000001.1 | <i>Simoselaps roperi</i>   |
| 102 | GAHA01000002.1 | <i>Simoselaps roperi</i>   |
| 103 | GAHA01000006.1 | <i>Simoselaps roperi</i>   |
| 104 | GAHA01000007.1 | <i>Simoselaps roperi</i>   |
| 105 | GAHA01000008.1 | <i>Simoselaps roperi</i>   |
| 106 | GAHC01000001.1 | <i>Denisonia devisi</i>    |
| 107 | GAHC01000002.1 | <i>Denisonia devisi</i>    |
| 108 | GAHC01000003.1 | <i>Denisonia devisi</i>    |
| 109 | GAHC01000004.1 | <i>Denisonia devisi</i>    |
| 110 | GAHD01000001.1 | <i>Echiopsis curta</i>     |
| 111 | GAHD01000002.1 | <i>Echiopsis curta</i>     |
| 112 | GAHD01000003.1 | <i>Echiopsis curta</i>     |
| 113 | GAHD01000004.1 | <i>Echiopsis curta</i>     |
| 114 | GAHD01000005.1 | <i>Echiopsis curta</i>     |
| 115 | GAHD01000006.1 | <i>Echiopsis curta</i>     |
| 116 | GAHE01000001.1 | <i>Furina ornata</i>       |
| 117 | GAHE01000002.1 | <i>Furina ornata</i>       |
| 118 | GAHE01000003.1 | <i>Furina ornata</i>       |
| 119 | GAHE01000004.1 | <i>Furina ornata</i>       |
| 120 | GAHE01000005.1 | <i>Furina ornata</i>       |
| 121 | GAHE01000006.1 | <i>Furina ornata</i>       |
| 122 | GAHE01000007.1 | <i>Furina ornata</i>       |
| 123 | GAHE01000008.1 | <i>Furina ornata</i>       |
| 124 | GAHE01000009.1 | <i>Furina ornata</i>       |
| 125 | GAHE01000010.1 | <i>Furina ornata</i>       |
| 126 | GAHE01000011.1 | <i>Furina ornata</i>       |
| 127 | GAHE01000012.1 | <i>Furina ornata</i>       |
| 128 | GAHE01000013.1 | <i>Furina ornata</i>       |
| 129 | GAHE01000014.1 | <i>Furina ornata</i>       |
| 130 | GAHE01000015.1 | <i>Furina ornata</i>       |
| 131 | GAHE01000016.1 | <i>Furina ornata</i>       |
| 132 | GAHF01000001.1 | <i>Hemiaspis signata</i>   |
| 133 | GAHF01000002.1 | <i>Hemiaspis signata</i>   |
| 134 | GAHF01000003.1 | <i>Hemiaspis signata</i>   |
| 135 | GAHF01000004.1 | <i>Hemiaspis signata</i>   |

**Table S3: Sequences Analyzed**

|     |                |                                  |
|-----|----------------|----------------------------------|
| 136 | GAHF01000005.1 | <i>Hemiaspis signata</i>         |
| 137 | GAHF01000006.1 | <i>Hemiaspis signata</i>         |
| 138 | GAHF01000007.1 | <i>Hemiaspis signata</i>         |
| 139 | GAHF01000008.1 | <i>Hemiaspis signata</i>         |
| 140 | GAHG01000001.1 | <i>Hoplocephalus bungaroides</i> |
| 141 | GAHG01000002.1 | <i>Hoplocephalus bungaroides</i> |
| 142 | GAHH01000034.1 | <i>Pseudonaja modesta</i>        |
| 143 | GAHH01000039.1 | <i>Pseudonaja modesta</i>        |
| 144 | GAHH01000040.1 | <i>Pseudonaja modesta</i>        |
| 145 | GAHH01000041.1 | <i>Pseudonaja modesta</i>        |
| 146 | GAHH01000042.1 | <i>Pseudonaja modesta</i>        |
| 147 | GAHH01000043.1 | <i>Pseudonaja modesta</i>        |
| 148 | GAHH01000044.1 | <i>Pseudonaja modesta</i>        |
| 149 | GAHH01000045.1 | <i>Pseudonaja modesta</i>        |
| 150 | GAHH01000046.1 | <i>Pseudonaja modesta</i>        |
| 151 | GAHI01000001.1 | <i>Suta fasciata</i>             |
| 152 | GAHI01000002.1 | <i>Suta fasciata</i>             |
| 153 | GAHI01000003.1 | <i>Suta fasciata</i>             |
| 154 | GAHI01000004.1 | <i>Suta fasciata</i>             |
| 155 | GAHJ01000008.1 | <i>Vermicella annulata</i>       |
| 156 | GAHJ01000009.1 | <i>Vermicella annulata</i>       |
| 157 | GAHJ01000010.1 | <i>Vermicella annulata</i>       |
| 158 | Y17057.1       | <i>Bungarus multicinctus</i>     |

| <b>Type III <math>\alpha</math>-neurotoxic 3FTx</b> |                |                             |
|-----------------------------------------------------|----------------|-----------------------------|
| 1                                                   | AF082975.1     | <i>Pseudonaja textilis</i>  |
| 2                                                   | AF082976.1     | <i>Pseudonaja textilis</i>  |
| 3                                                   | AF082977.1     | <i>Pseudonaja textilis</i>  |
| 4                                                   | AF082978.1     | <i>Pseudonaja textilis</i>  |
| 5                                                   | AF082979.1     | <i>Pseudonaja textilis</i>  |
| 6                                                   | AF082981.1     | <i>Pseudonaja textilis</i>  |
| 7                                                   | DQ917506.1     | <i>Pseudonaja textilis</i>  |
| 8                                                   | GAHA01000009.1 | <i>Simoselaps roperi</i>    |
| 9                                                   | GAHA01000010.1 | <i>Simoselaps roperi</i>    |
| 10                                                  | GAHA01000011.1 | <i>Simoselaps roperi</i>    |
| 11                                                  | GAHB01000009.1 | <i>Cacophis squamulosus</i> |
| 12                                                  | GAHB01000010.1 | <i>Cacophis squamulosus</i> |
| 13                                                  | GAHB01000011.1 | <i>Cacophis squamulosus</i> |

**Table S3: Sequences Analyzed**

|    |                |                           |
|----|----------------|---------------------------|
| 14 | GAHE01000017.1 | <i>Furina ornata</i>      |
| 15 | GAHE01000018.1 | <i>Furina ornata</i>      |
| 16 | GAHE01000019.1 | <i>Furina ornata</i>      |
| 17 | GAHE01000020.1 | <i>Furina ornata</i>      |
| 18 | GAHE01000021.1 | <i>Furina ornata</i>      |
| 19 | GAHE01000022.1 | <i>Furina ornata</i>      |
| 20 | GAHE01000023.1 | <i>Furina ornata</i>      |
| 21 | GAHE01000024.1 | <i>Furina ornata</i>      |
| 22 | GAHE01000025.1 | <i>Furina ornata</i>      |
| 23 | GAHH01000001.1 | <i>Pseudonaja modesta</i> |
| 24 | GAHH01000002.1 | <i>Pseudonaja modesta</i> |
| 25 | GAHH01000003.1 | <i>Pseudonaja modesta</i> |
| 26 | GAHH01000004.1 | <i>Pseudonaja modesta</i> |
| 27 | GAHH01000005.1 | <i>Pseudonaja modesta</i> |
| 28 | GAHH01000006.1 | <i>Pseudonaja modesta</i> |
| 29 | GAHH01000007.1 | <i>Pseudonaja modesta</i> |
| 30 | GAHH01000008.1 | <i>Pseudonaja modesta</i> |
| 31 | GAHH01000009.1 | <i>Pseudonaja modesta</i> |
| 32 | GAHH01000010.1 | <i>Pseudonaja modesta</i> |
| 33 | GAHH01000011.1 | <i>Pseudonaja modesta</i> |
| 34 | GAHH01000012.1 | <i>Pseudonaja modesta</i> |
| 35 | GAHH01000013.1 | <i>Pseudonaja modesta</i> |
| 36 | GAHH01000014.1 | <i>Pseudonaja modesta</i> |
| 37 | GAHH01000015.1 | <i>Pseudonaja modesta</i> |
| 38 | GAHH01000016.1 | <i>Pseudonaja modesta</i> |
| 39 | GAHH01000017.1 | <i>Pseudonaja modesta</i> |
| 40 | GAHH01000018.1 | <i>Pseudonaja modesta</i> |
| 41 | GAHH01000019.1 | <i>Pseudonaja modesta</i> |
| 42 | GAHH01000020.1 | <i>Pseudonaja modesta</i> |
| 43 | GAHH01000021.1 | <i>Pseudonaja modesta</i> |
| 44 | GAHH01000022.1 | <i>Pseudonaja modesta</i> |
| 45 | GAHH01000023.1 | <i>Pseudonaja modesta</i> |
| 46 | GAHH01000024.1 | <i>Pseudonaja modesta</i> |
| 47 | GAHH01000025.1 | <i>Pseudonaja modesta</i> |
| 48 | GAHH01000026.1 | <i>Pseudonaja modesta</i> |
| 49 | GAHH01000027.1 | <i>Pseudonaja modesta</i> |
| 50 | GAHH01000028.1 | <i>Pseudonaja modesta</i> |
| 51 | GAHH01000029.1 | <i>Pseudonaja modesta</i> |
| 52 | GAHH01000030.1 | <i>Pseudonaja modesta</i> |

**Table S3: Sequences Analyzed**

|    |                |                            |
|----|----------------|----------------------------|
| 53 | GAHH01000031.1 | <i>Pseudonaja modesta</i>  |
| 54 | GAHH01000032.1 | <i>Pseudonaja modesta</i>  |
| 55 | GAHH01000033.1 | <i>Pseudonaja modesta</i>  |
| 56 | GAHJ01000001.1 | <i>Vermicella annulata</i> |
| 57 | GAHJ01000002.1 | <i>Vermicella annulata</i> |
| 58 | GAHJ01000003.1 | <i>Vermicella annulata</i> |
| 59 | GAHJ01000004.1 | <i>Vermicella annulata</i> |
| 60 | GAHJ01000005.1 | <i>Vermicella annulata</i> |
| 61 | GAHJ01000006.1 | <i>Vermicella annulata</i> |
| 62 | GAHJ01000007.1 | <i>Vermicella annulata</i> |

| <b><i>Crotalus o. helleri</i> Kallikreins</b> |                |                                  |
|-----------------------------------------------|----------------|----------------------------------|
| 1                                             | GAKS01000006.1 | <i>Crotalus oreganus helleri</i> |
| 2                                             | GAKQ01000008.1 | <i>Crotalus oreganus helleri</i> |
| 3                                             | GALC01000005.1 | <i>Crotalus oreganus helleri</i> |
| 4                                             | GAKS01000007.1 | <i>Crotalus oreganus helleri</i> |
| 5                                             | GAKR01000007.1 | <i>Crotalus oreganus helleri</i> |
| 6                                             | GALC01000006.1 | <i>Crotalus oreganus helleri</i> |
| 7                                             | GALC01000007.1 | <i>Crotalus oreganus helleri</i> |
| 8                                             | GAKQ01000009.1 | <i>Crotalus oreganus helleri</i> |
| 9                                             | GAKR01000008.1 | <i>Crotalus oreganus helleri</i> |
| 10                                            | GAKS01000008.1 | <i>Crotalus oreganus helleri</i> |
| 11                                            | GALC01000008.1 | <i>Crotalus oreganus helleri</i> |
| 12                                            | GAKQ01000010.1 | <i>Crotalus oreganus helleri</i> |
| 13                                            | GAKR01000009.1 | <i>Crotalus oreganus helleri</i> |
| 14                                            | GAKS01000009.1 | <i>Crotalus oreganus helleri</i> |
| 15                                            | GAKQ01000011.1 | <i>Crotalus oreganus helleri</i> |
| 16                                            | GAKR01000011.1 | <i>Crotalus oreganus helleri</i> |
| 17                                            | GALC01000009.1 | <i>Crotalus oreganus helleri</i> |
| 18                                            | GAKS01000012.1 | <i>Crotalus oreganus helleri</i> |
| 19                                            | GAKR01000010.1 | <i>Crotalus oreganus helleri</i> |
| 20                                            | GAKS01000010.1 | <i>Crotalus oreganus helleri</i> |
| 21                                            | GAKQ01000012.1 | <i>Crotalus oreganus helleri</i> |
| 22                                            | GALC01000011.1 | <i>Crotalus oreganus helleri</i> |
| 23                                            | GALC01000010.1 | <i>Crotalus oreganus helleri</i> |
| 24                                            | GAKS01000011.1 | <i>Crotalus oreganus helleri</i> |

**Table S3:** Sequences Analyzed

| <b><i>Crotalus o. helleri</i> <math>\beta</math>-defensins</b> |                |                                  |
|----------------------------------------------------------------|----------------|----------------------------------|
| 1                                                              | GALC01000001.1 | <i>Crotalus oreganus helleri</i> |
| 2                                                              | GAKS01000001.1 | <i>Crotalus oreganus helleri</i> |
| 3                                                              | GAKS01000002.1 | <i>Crotalus oreganus helleri</i> |
| 4                                                              | GAKR01000001.1 | <i>Crotalus oreganus helleri</i> |
| 5                                                              | GAKQ01000001.1 | <i>Crotalus oreganus helleri</i> |
| 6                                                              | GAKQ01000002.1 | <i>Crotalus oreganus helleri</i> |
| 7                                                              | GAKR01000002.1 | <i>Crotalus oreganus helleri</i> |
| 8                                                              | GAKQ01000003.1 | <i>Crotalus oreganus helleri</i> |
| 9                                                              | GAKS01000003.1 | <i>Crotalus oreganus helleri</i> |

| <b>Serine Proteases</b> |            |                                          |
|-------------------------|------------|------------------------------------------|
| 1                       | HQ270467.1 | <i>Agkistrodon piscivorus leucostoma</i> |
| 2                       | KF410948.1 | <i>Bothrops pictus pictobin</i>          |
| 3                       | AJ001209.1 | <i>Agkistrodon acutus</i>                |
| 4                       | AF159057.1 | <i>Deinagkistrodon acutus</i>            |
| 5                       | AF159059.1 | <i>Deinagkistrodon acutus</i>            |
| 6                       | AF159060.1 | <i>Deinagkistrodon acutus</i>            |
| 7                       | AJ006471.1 | <i>Agkistrodon acutus</i>                |
| 8                       | AF333768.1 | <i>Deinagkistrodon acutus</i>            |
| 9                       | AY861382.1 | <i>Deinagkistrodon acutus</i>            |
| 10                      | AY861383.1 | <i>Deinagkistrodon acutus</i>            |
| 11                      | AY861138.1 | <i>Deinagkistrodon acutus</i>            |
| 12                      | EU681180.1 | <i>Deinagkistrodon acutus</i>            |
| 13                      | HQ270465.1 | <i>Daboia russellii siamensis</i>        |
| 14                      | DQ464238.1 | <i>Sistrurus catenatus edwardsi</i>      |
| 15                      | DQ464239.1 | <i>Sistrurus catenatus edwardsi</i>      |
| 16                      | DQ464242.1 | <i>Sistrurus catenatus edwardsi</i>      |
| 17                      | DQ464243.1 | <i>Sistrurus catenatus edwardsi</i>      |
| 18                      | DQ464244.1 | <i>Sistrurus catenatus edwardsi</i>      |
| 19                      | DQ464245.1 | <i>Sistrurus catenatus edwardsi</i>      |
| 20                      | DQ464247.1 | <i>Sistrurus catenatus edwardsi</i>      |
| 21                      | DQ464246.1 | <i>Sistrurus catenatus edwardsi</i>      |
| 22                      | HQ414117.1 | <i>Crotalus adamanteus</i>               |
| 23                      | HQ414118.1 | <i>Crotalus adamanteus</i>               |
| 24                      | HQ414121.1 | <i>Crotalus adamanteus</i>               |
| 25                      | HQ414122.1 | <i>Crotalus adamanteus</i>               |

**Table S3:** Sequences Analyzed

|    |            |                                     |
|----|------------|-------------------------------------|
| 26 | GU012098.1 | <i>Echis coloratus</i>              |
| 27 | GU012106.1 | <i>Echis coloratus</i>              |
| 28 | GU012107.1 | <i>Echis coloratus</i>              |
| 29 | GU012108.1 | <i>Echis coloratus</i>              |
| 30 | GU012112.1 | <i>Echis coloratus</i>              |
| 31 | GU592440.1 | <i>Echis coloratus</i>              |
| 32 | GU012100.1 | <i>Echis coloratus</i>              |
| 33 | AF490536.1 | <i>Bothrops insularis</i>           |
| 34 | AF056033.1 | <i>Agkistrodon halys pallas</i>     |
| 35 | AF015727.1 | <i>Agkistrodon halys pallas</i>     |
| 36 | AJ006472.1 | <i>Agkistrodon halys pallas</i>     |
| 37 | AJ001210.1 | <i>Agkistrodon halys pallas</i>     |
| 38 | AY225505.1 | <i>Agkistrodon halys pallas</i>     |
| 39 | JQ965747.1 | <i>Agkistrodon halys pallas</i>     |
| 40 | KC537786.1 | <i>Agkistrodon halys pallas</i>     |
| 41 | KC537787.1 | <i>Agkistrodon halys pallas</i>     |
| 42 | D67082.1   | <i>Trimeresurus gramineus</i>       |
| 43 | D67083.1   | <i>Trimeresurus gramineus</i>       |
| 44 | D67085.1   | <i>Trimeresurus gramineus</i>       |
| 45 | AB031394.1 | <i>Bothrops jararaca</i>            |
| 46 | AY251282.1 | <i>Bothrops jararacussu</i>         |
| 47 | AJ251153.1 | <i>Vipera lebetina</i>              |
| 48 | GU570565.1 | <i>Macrovipera lebetina</i>         |
| 49 | GU570566.1 | <i>Macrovipera lebetina</i>         |
| 50 | GU570567.1 | <i>Macrovipera lebetina</i>         |
| 51 | L07308.1   | <i>Calloselasma rhodostoma</i>      |
| 52 | AJ243757.1 | <i>Agkistrodon blomhoffii</i>       |
| 53 | AB749761.1 | <i>Agkistrodon blomhoffii</i>       |
| 54 | AB749762.1 | <i>Agkistrodon blomhoffii</i>       |
| 55 | AB984572.1 | <i>Protobothrops elegans</i>        |
| 56 | D67079.1   | <i>Trimeresurus flavoviridis</i>    |
| 57 | D67080.1   | <i>Trimeresurus flavoviridis</i>    |
| 58 | AB848162.1 | <i>Trimeresurus flavoviridis</i>    |
| 59 | AF292110.1 | <i>Trimeresurus jerdonii</i>        |
| 60 | EU400543.1 | <i>Trimeresurus jerdonii</i>        |
| 61 | X83221.1   | <i>Protobothrops mucrosquamatus</i> |
| 62 | X83222.1   | <i>Protobothrops mucrosquamatus</i> |
| 63 | X83223.1   | <i>Protobothrops mucrosquamatus</i> |
| 64 | X83224.1   | <i>Protobothrops mucrosquamatus</i> |

**Table S3: Sequences Analyzed**

|    |            |                                     |
|----|------------|-------------------------------------|
| 65 | X83225.1   | <i>Protobothrops mucrosquamatus</i> |
| 66 | U31417.1   | <i>Protobothrops mucrosquamatus</i> |
| 67 | AF098262.1 | <i>Protobothrops mucrosquamatus</i> |
| 68 | AF098263.1 | <i>Protobothrops mucrosquamatus</i> |
| 69 | AY434726.1 | <i>Gloydus shedaoensis</i>          |
| 70 | AF017736.1 | <i>Gloydus brevicaudus</i>          |
| 71 | AF176679.1 | <i>Gloydus brevicaudus</i>          |
| 72 | AF545575.1 | <i>Trimeresurus stejnegeri</i>      |
| 73 | AF545576.1 | <i>Trimeresurus stejnegeri</i>      |
| 74 | AF545577.1 | <i>Trimeresurus stejnegeri</i>      |
| 75 | AF545579.1 | <i>Trimeresurus stejnegeri</i>      |
| 76 | AF395763.1 | <i>Trimeresurus stejnegeri</i>      |
| 77 | AF395765.1 | <i>Trimeresurus stejnegeri</i>      |
| 78 | AF395768.1 | <i>Trimeresurus stejnegeri</i>      |
| 79 | AF395771.1 | <i>Trimeresurus stejnegeri</i>      |
| 80 | AF395773.1 | <i>Trimeresurus stejnegeri</i>      |
| 81 | AF395774.1 | <i>Trimeresurus stejnegeri</i>      |
| 82 | AF395775.1 | <i>Trimeresurus stejnegeri</i>      |
| 83 | AF395776.1 | <i>Trimeresurus stejnegeri</i>      |
| 84 | AF395777.1 | <i>Trimeresurus stejnegeri</i>      |
| 85 | AF395778.1 | <i>Trimeresurus stejnegeri</i>      |
| 86 | AF395779.1 | <i>Trimeresurus stejnegeri</i>      |
| 87 | AF395781.1 | <i>Trimeresurus stejnegeri</i>      |
| 88 | AY954040.1 | <i>Crotalus durissus terrificus</i> |
| 89 | EU360951.1 | <i>Crotalus durissus terrificus</i> |
| 90 | EU360952.1 | <i>Crotalus durissus terrificus</i> |
| 91 | EU360954.1 | <i>Crotalus durissus terrificus</i> |
| 92 | U32937.1   | <i>Agkistrodon ussuriensis</i>      |
| 93 | AF018568.1 | <i>Gloydus ussuriensis</i>          |
| 94 | AF444251.1 | <i>Gloydus ussuriensis</i>          |
| 95 | AF336126.1 | <i>Gloydus ussuriensis</i>          |
| 96 | AF370124.1 | <i>Gloydus ussuriensis</i>          |
| 97 | AF227153.1 | <i>Crotalus atrox</i>               |
| 98 | EF690365.1 | <i>Cryptelytrops albolabris</i>     |
| 99 | EF690366.1 | <i>Cryptelytrops albolabris</i>     |

| <b>PLA2 Type I</b> |            |                  |
|--------------------|------------|------------------|
| 1                  | AM492700.1 | <i>Naja atra</i> |

**Table S3: Sequences Analyzed**

|    |            |                              |
|----|------------|------------------------------|
| 2  | AB011388.1 | <i>Naja kaouthia</i>         |
| 3  | AB011389.1 | <i>Naja kaouthia</i>         |
| 4  | X63947.1   | <i>Naja Naja</i>             |
| 5  | X73225.1   | <i>Naja Naja</i>             |
| 6  | X77755.1   | <i>Naja Naja</i>             |
| 7  | L42004.1   | <i>Naja Naja</i>             |
| 8  | L42005.1   | <i>Naja Naja</i>             |
| 9  | L42006.1   | <i>Naja Naja</i>             |
| 10 | AY422776.1 | <i>Naja sagittifera</i>      |
| 11 | AY433936.1 | <i>Naja sagittifera</i>      |
| 12 | AY443496.1 | <i>Naja sagittifera</i>      |
| 13 | AY422775.2 | <i>Naja sagittifera</i>      |
| 14 | AY862399.1 | <i>Naja sagittifera</i>      |
| 15 | AY862400.1 | <i>Naja sagittifera</i>      |
| 16 | AF101235.1 | <i>Naja sputatrix</i>        |
| 17 | AF101236.1 | <i>Naja sputatrix</i>        |
| 18 | AY081146.1 | <i>Bungarus caeruleus</i>    |
| 19 | AY081147.1 | <i>Bungarus caeruleus</i>    |
| 20 | AF297663.1 | <i>Bungarus caeruleus</i>    |
| 21 | AY455756.1 | <i>Bungarus caeruleus</i>    |
| 22 | AY455754.1 | <i>Bungarus caeruleus</i>    |
| 23 | AY057880.1 | <i>Bungarus candidus</i>     |
| 24 | AY057882.1 | <i>Bungarus candidus</i>     |
| 25 | AY142324.1 | <i>Bungarus candidus</i>     |
| 26 | AY425948.1 | <i>Bungarus candidus</i>     |
| 27 | AY425950.1 | <i>Bungarus candidus</i>     |
| 28 | AB158299.1 | <i>Bungarus candidus</i>     |
| 29 | DQ768745.1 | <i>Bungarus fasciatus</i>    |
| 30 | AB112356.1 | <i>Bungarus flaviceps</i>    |
| 31 | AB112357.1 | <i>Bungarus flaviceps</i>    |
| 32 | GU190818.1 | <i>Bungarus flaviceps</i>    |
| 33 | GU190819.1 | <i>Bungarus flaviceps</i>    |
| 34 | GU190820.1 | <i>Bungarus flaviceps</i>    |
| 35 | AB112359.1 | <i>Bungarus flaviceps</i>    |
| 36 | AB112360.1 | <i>Bungarus flaviceps</i>    |
| 37 | GU190815.1 | <i>Bungarus flaviceps</i>    |
| 38 | GU190816.1 | <i>Bungarus flaviceps</i>    |
| 39 | GU190817.1 | <i>Bungarus flaviceps</i>    |
| 40 | X53407.1   | <i>Bungarus multicinctus</i> |



**Table S3:** Sequences Analyzed

|    |                |                                  |
|----|----------------|----------------------------------|
| 41 | X98205.1       | <i>Bungarus multicinctus</i>     |
| 42 | AJ251360.1     | <i>Bungarus multicinctus</i>     |
| 43 | AJ242011.1     | <i>Bungarus multicinctus</i>     |
| 44 | AJ242012.1     | <i>Bungarus multicinctus</i>     |
| 45 | AJ242013.1     | <i>Bungarus multicinctus</i>     |
| 46 | AJ251220.1     | <i>Bungarus multicinctus</i>     |
| 47 | AJ251221.1     | <i>Bungarus multicinctus</i>     |
| 48 | AJ251222.1     | <i>Bungarus multicinctus</i>     |
| 49 | AJ251227.1     | <i>Bungarus multicinctus</i>     |
| 50 | AJ223249.1     | <i>Bungarus multicinctus</i>     |
| 51 | AJ431711.1     | <i>Bungarus multicinctus</i>     |
| 52 | AJ431707.1     | <i>Bungarus multicinctus</i>     |
| 53 | AJ431708.1     | <i>Bungarus multicinctus</i>     |
| 54 | AJ431709.1     | <i>Bungarus multicinctus</i>     |
| 55 | AJ431710.1     | <i>Bungarus multicinctus</i>     |
| 56 | AJ431712.1     | <i>Bungarus multicinctus</i>     |
| 57 | DQ810293.1     | <i>Bungarus multicinctus</i>     |
| 58 | X53406.1       | <i>Bungarus multicinctus</i>     |
| 59 | GAGZ01000025.1 | <i>Acanthophis wellsi</i>        |
| 60 | GAGZ01000030.1 | <i>Acanthophis wellsi</i>        |
| 61 | GAGZ01000026.1 | <i>Acanthophis wellsi</i>        |
| 62 | GAGZ01000029.1 | <i>Acanthophis wellsi</i>        |
| 63 | GAHA01000028.1 | <i>Brachyuropis roperi</i>       |
| 64 | GAHC01000018.1 | <i>Denisonia devisi</i>          |
| 65 | GAHC01000017.1 | <i>Denisonia devisi</i>          |
| 66 | GAHG01000028.1 | <i>Hoplocephalus bungaroides</i> |
| 67 | GAHG01000023.1 | <i>Hoplocephalus bungaroides</i> |
| 68 | GAHG01000024.1 | <i>Hoplocephalus bungaroides</i> |
| 69 | GAHG01000025.1 | <i>Hoplocephalus bungaroides</i> |
| 70 | GAHG01000026.1 | <i>Hoplocephalus bungaroides</i> |
| 71 | GAHI01000022.1 | <i>Suta fasciata</i>             |
| 72 | GAHI01000028.1 | <i>Suta fasciata</i>             |
| 73 | GAHI01000024.1 | <i>Suta fasciata</i>             |
| 74 | GAHI01000029.1 | <i>Suta fasciata</i>             |
| 75 | GAHI01000026.1 | <i>Suta fasciata</i>             |
| 76 | GAHI01000021.1 | <i>Suta fasciata</i>             |
| 77 | GAHI01000023.1 | <i>Suta fasciata</i>             |
| 78 | GAGZ01000028.1 | <i>Acanthophis wellsi</i>        |
| 79 | GAGZ01000024.1 | <i>Acanthophis wellsi</i>        |

**Table S3:** Sequences Analyzed

|     |                |                                 |
|-----|----------------|---------------------------------|
| 80  | GAHI01000025.1 | <i>Suta fasciata</i>            |
| 81  | GAHI01000027.1 | <i>Suta fasciata</i>            |
| 82  | EU003106.1     | <i>Austrelaps labialis</i>      |
| 83  | EU003107.1     | <i>Austrelaps labialis</i>      |
| 84  | EU003108.1     | <i>Austrelaps labialis</i>      |
| 85  | EU003109.1     | <i>Austrelaps labialis</i>      |
| 86  | EU003105.1     | <i>Austrelaps labialis</i>      |
| 87  | AF184137.1     | <i>Austrelaps labialis</i>      |
| 88  | AF184138.1     | <i>Austrelaps labialis</i>      |
| 89  | AF184139.1     | <i>Austrelaps labialis</i>      |
| 90  | AF184140.1     | <i>Austrelaps labialis</i>      |
| 91  | AF184141.1     | <i>Austrelaps labialis</i>      |
| 92  | EF599325.1     | <i>Austrelaps labialis</i>      |
| 93  | AF184127.1     | <i>Austrelaps superbus</i>      |
| 94  | AF184128.1     | <i>Austrelaps superbus</i>      |
| 95  | AF184129.1     | <i>Austrelaps superbus</i>      |
| 96  | AF184130.1     | <i>Austrelaps superbus</i>      |
| 97  | AF184131.1     | <i>Austrelaps superbus</i>      |
| 98  | AF184132.1     | <i>Austrelaps superbus</i>      |
| 99  | AF184133.1     | <i>Austrelaps superbus</i>      |
| 100 | AF184134.1     | <i>Austrelaps superbus</i>      |
| 101 | AF184135.1     | <i>Austrelaps superbus</i>      |
| 102 | AF184136.1     | <i>Austrelaps superbus</i>      |
| 103 | AY178051.1     | <i>Austrelaps superbus</i>      |
| 104 | EF599324.1     | <i>Austrelaps superbus</i>      |
| 105 | EF599326.1     | <i>Austrelaps superbus</i>      |
| 106 | DQ917537.1     | <i>Demansia vestigiata</i>      |
| 107 | DQ917538.1     | <i>Demansia vestigiata</i>      |
| 108 | DQ917539.1     | <i>Demansia vestigiata</i>      |
| 109 | DQ917540.1     | <i>Demansia vestigiata</i>      |
| 110 | FJ752448.1     | <i>Drysdalia coronoides</i>     |
| 111 | FJ752450.1     | <i>Drysdalia coronoides</i>     |
| 112 | EF164997.1     | <i>Hoplocephalus stephensii</i> |
| 113 | EF164998.1     | <i>Hoplocephalus stephensii</i> |
| 114 | EF164996.1     | <i>Hoplocephalus stephensii</i> |
| 115 | X12605.1       | <i>Notechis scutatus</i>        |
| 116 | X14043.1       | <i>Notechis scutatus</i>        |
| 117 | DQ085831.1     | <i>Notechis scutatus</i>        |
| 118 | DQ085832.1     | <i>Notechis scutatus</i>        |

**Table S3:** Sequences Analyzed

|     |            |                                    |
|-----|------------|------------------------------------|
| 119 | DQ085833.1 | <i>Notechis scutatus</i>           |
| 120 | DQ917544.1 | <i>Notechis scutatus</i>           |
| 121 | DQ085822.1 | <i>Oxyuranus microlepidotus</i>    |
| 122 | DQ085823.1 | <i>Oxyuranus microlepidotus</i>    |
| 123 | DQ085824.1 | <i>Oxyuranus microlepidotus</i>    |
| 124 | DQ085825.1 | <i>Oxyuranus microlepidotus</i>    |
| 125 | DQ085820.1 | <i>Oxyuranus microlepidotus</i>    |
| 126 | AY691661.1 | <i>Oxyuranus scutellatus</i>       |
| 127 | AY691662.1 | <i>Oxyuranus scutellatus</i>       |
| 128 | DQ085819.1 | <i>Oxyuranus scutellatus</i>       |
| 129 | DQ085817.1 | <i>Oxyuranus scutellatus</i>       |
| 130 | DQ085818.1 | <i>Oxyuranus scutellatus</i>       |
| 131 | AY691657.1 | <i>Oxyuranus scutellatus</i>       |
| 132 | AY691658.1 | <i>Oxyuranus scutellatus</i>       |
| 133 | DQ085843.1 | <i>Pseudechis australis</i>        |
| 134 | DQ085842.1 | <i>Pseudechis australis</i>        |
| 135 | DQ085844.1 | <i>Pseudechis australis</i>        |
| 136 | DQ085846.1 | <i>Pseudechis australis</i>        |
| 137 | DQ085847.1 | <i>Pseudechis australis</i>        |
| 138 | DQ085848.1 | <i>Pseudechis australis</i>        |
| 139 | AB531118.1 | <i>Pseudechis australis</i>        |
| 140 | AB531119.1 | <i>Pseudechis australis</i>        |
| 141 | AB531121.1 | <i>Pseudechis australis</i>        |
| 142 | AB531123.1 | <i>Pseudechis australis</i>        |
| 143 | AB531124.1 | <i>Pseudechis australis</i>        |
| 144 | AB531125.1 | <i>Pseudechis australis</i>        |
| 145 | AB531126.1 | <i>Pseudechis australis</i>        |
| 146 | DQ085849.1 | <i>Pseudechis porphyriacus</i>     |
| 147 | DQ085850.1 | <i>Pseudechis porphyriacus</i>     |
| 148 | DQ085852.1 | <i>Pseudechis porphyriacus</i>     |
| 149 | DQ085853.1 | <i>Pseudechis porphyriacus</i>     |
| 150 | DQ085854.1 | <i>Pseudechis porphyriacus</i>     |
| 151 | DQ085851.1 | <i>Pseudechis porphyriacus</i>     |
| 152 | EU523132.1 | <i>Pseudonaja textilis</i>         |
| 153 | DQ085829.1 | <i>Pseudonaja textilis</i>         |
| 154 | DQ085828.1 | <i>Pseudonaja textilis</i>         |
| 155 | DQ085830.1 | <i>Pseudonaja textilis</i>         |
| 156 | DQ917542.1 | <i>Rhinoplocephalus nigrescens</i> |
| 157 | DQ917541.1 | <i>Rhinoplocephalus nigrescens</i> |

**Table S3:** Sequences Analyzed

|     |            |                                    |
|-----|------------|------------------------------------|
| 158 | DQ917543.1 | <i>Rhinoplocephalus nigrescens</i> |
| 159 | DQ917549.1 | <i>Rhinoplocephalus nigrescens</i> |
| 160 | FJ790477.1 | <i>Suta nigriceps</i>              |
| 161 | FJ790471.1 | <i>Suta nigriceps</i>              |
| 162 | FJ790472.1 | <i>Suta nigriceps</i>              |
| 163 | FJ790473.1 | <i>Suta nigriceps</i>              |
| 164 | FJ790474.1 | <i>Suta nigriceps</i>              |
| 165 | FJ790475.1 | <i>Suta nigriceps</i>              |
| 166 | FJ790476.1 | <i>Suta nigriceps</i>              |
| 167 | DQ917545.1 | <i>Tropidechis carinatus</i>       |
| 168 | AB062445.1 | <i>Laticauda colubrina</i>         |
| 169 | AB062446.1 | <i>Laticauda colubrina</i>         |
| 170 | AB062447.1 | <i>Laticauda colubrina</i>         |
| 171 | AB062448.1 | <i>Laticauda colubrina</i>         |
| 172 | Y00377.1   | <i>Laticauda laticaudata</i>       |
| 173 | AB062441.1 | <i>Laticauda laticaudata</i>       |
| 174 | AB062442.1 | <i>Laticauda laticaudata</i>       |
| 175 | AB062443.1 | <i>Laticauda laticaudata</i>       |
| 176 | AB062444.1 | <i>Laticauda laticaudata</i>       |
| 177 | AB037409.1 | <i>Laticauda semifasciata</i>      |
| 178 | AB037410.1 | <i>Laticauda semifasciata</i>      |
| 179 | AB037411.1 | <i>Laticauda semifasciata</i>      |
| 180 | AB037412.1 | <i>Laticauda semifasciata</i>      |
| 181 | AB037413.1 | <i>Laticauda semifasciata</i>      |
| 182 | AB037414.1 | <i>Laticauda semifasciata</i>      |
| 183 | AB037415.1 | <i>Laticauda semifasciata</i>      |
| 184 | AB062439.1 | <i>Laticauda semifasciata</i>      |
| 185 | AB062440.1 | <i>Laticauda semifasciata</i>      |
| 186 | AB120375.1 | <i>Laticauda semifasciata</i>      |
| 187 | AB120376.1 | <i>Laticauda semifasciata</i>      |
| 188 | AB037219.2 | <i>Laticauda semifasciata</i>      |
| 189 | AF144319.1 | <i>Lapemis hardwickii</i>          |
| 190 | AF205378.1 | <i>Lapemis hardwickii</i>          |
| 191 | EF405872.1 | <i>Lapemis hardwickii</i>          |
| 192 | EF405876.1 | <i>Lapemis hardwickii</i>          |
| 193 | AF144320.1 | <i>Lapemis hardwickii</i>          |
| 194 | AY561165.1 | <i>Aipysurus eydouxii</i>          |
| 195 | AY561169.1 | <i>Aipysurus eydouxii</i>          |
| 196 | AY561168.1 | <i>Aipysurus eydouxii</i>          |

**Table S3: Sequences Analyzed**

|     |                |                                  |
|-----|----------------|----------------------------------|
| 197 | AY561157.1     | <i>Aipysurus eydouxii</i>        |
| 198 | AY561154.1     | <i>Aipysurus eydouxii</i>        |
| 199 | AY561159.1     | <i>Aipysurus eydouxii</i>        |
| 200 | AY561167.1     | <i>Aipysurus eydouxii</i>        |
| 201 | AY561163.1     | <i>Aipysurus eydouxii</i>        |
| 202 | AY561161.1     | <i>Aipysurus eydouxii</i>        |
| 203 | AY561156.1     | <i>Aipysurus eydouxii</i>        |
| 204 | AY561155.1     | <i>Aipysurus eydouxii</i>        |
| 205 | AY561164.1     | <i>Aipysurus eydouxii</i>        |
| 206 | AY561166.1     | <i>Aipysurus eydouxii</i>        |
| 207 | AY561162.1     | <i>Aipysurus eydouxii</i>        |
| 208 | AY561160.1     | <i>Aipysurus eydouxii</i>        |
| 209 | AY561158.1     | <i>Aipysurus eydouxii</i>        |
| 210 | X12604.1       | <i>Aipysurus laevis</i>          |
| 211 | GAGZ01000027.1 | <i>Acanthophis wellsii</i>       |
| 212 | GAHA01000030.1 | <i>Brachyurophis roperi</i>      |
| 213 | GAHA01000029.1 | <i>Brachyurophis roperi</i>      |
| 214 | GAHC01000016.1 | <i>Denisonia devisi</i>          |
| 215 | GAHG01000027.1 | <i>Hoplocephalus bungaroides</i> |
| 216 | GAHH01000068.1 | <i>Pseudonaja modesta</i>        |
| 217 | GAHH01000065.1 | <i>Pseudonaja modesta</i>        |
| 218 | GAHH01000066.1 | <i>Pseudonaja modesta</i>        |
| 219 | GAHH01000067.1 | <i>Pseudonaja modesta</i>        |
| 220 | GAHH01000069.1 | <i>Pseudonaja modesta</i>        |
| 221 | AF184142.1     | <i>Austrelaps superbus</i>       |
| 222 | AF184143.1     | <i>Austrelaps superbus</i>       |
| 223 | AB158302.1     | <i>Bungarus candidus</i>         |
| 224 | AY057881.1     | <i>Bungarus candidus</i>         |
| 225 | DQ917536.1     | <i>Demansia vestigiata</i>       |
| 226 | DQ917535.1     | <i>Demansia vestigiata</i>       |
| 227 | DQ917534.1     | <i>Demansia vestigiata</i>       |
| 228 | EF164994.1     | <i>Hoplocephalus stephensii</i>  |
| 229 | EF164995.1     | <i>Hoplocephalus stephensii</i>  |
| 230 | EF164993.1     | <i>Hoplocephalus stephensii</i>  |
| 231 | DQ085834.1     | <i>Notechis scutatus</i>         |
| 232 | DQ085835.1     | <i>Notechis scutatus</i>         |
| 233 | AF297034.1     | <i>Ophiophagus hannah</i>        |
| 234 | AF302908.1     | <i>Ophiophagus hannah</i>        |
| 235 | DQ085821.1     | <i>Oxyuranus microlepidotus</i>  |

**Table S3: Sequences Analyzed**

|     |            |                                 |
|-----|------------|---------------------------------|
| 236 | DQ085814.1 | <i>Oxyuranus scutellatus</i>    |
| 237 | DQ085815.1 | <i>Oxyuranus scutellatus</i>    |
| 238 | DQ085816.1 | <i>Oxyuranus scutellatus</i>    |
| 239 | AY691659.1 | <i>Oxyuranus scutellatus</i>    |
| 240 | AY691660.1 | <i>Oxyuranus scutellatus</i>    |
| 241 | DQ085813.1 | <i>Oxyuranus scutellatus</i>    |
| 242 | AB531117.1 | <i>Pseudechis cf. australis</i> |
| 243 | AF082983.1 | <i>Pseudonaja textilis</i>      |
| 244 | AF082984.1 | <i>Pseudonaja textilis</i>      |
| 245 | DQ085826.1 | <i>Pseudonaja textilis</i>      |
| 246 | DQ085827.1 | <i>Pseudonaja textilis</i>      |
| 247 | DQ085836.1 | <i>Tropidechis carinatus</i>    |
| 248 | DQ085837.1 | <i>Tropidechis carinatus</i>    |
| 249 | DQ085838.1 | <i>Tropidechis carinatus</i>    |
| 250 | DQ085839.1 | <i>Tropidechis carinatus</i>    |
| 251 | DQ085840.1 | <i>Tropidechis carinatus</i>    |
| 252 | DQ085841.1 | <i>Tropidechis carinatus</i>    |
| 253 | AB078348.1 | <i>Laticauda semifasciata</i>   |
| 254 | AB078347.1 | <i>Laticauda semifasciata</i>   |

| <b>PLA2 Type II</b> |            |                               |
|---------------------|------------|-------------------------------|
| 1                   | EU029748.1 | <i>Azemiops feae</i>          |
| 2                   | AY885662.1 | <i>Bitis arietans</i>         |
| 3                   | AY764137.1 | <i>Bothriechis schlegelii</i> |
| 4                   | AY355168.1 | <i>Bothriechis schlegelii</i> |
| 5                   | JQ661499.1 | <i>Bothropoides diporus</i>   |
| 6                   | JQ661500.1 | <i>Bothropoides diporus</i>   |
| 7                   | X76289.1   | <i>Bothrops jararacussu</i>   |
| 8                   | AY145836.1 | <i>Bothrops jararacussu</i>   |
| 9                   | GQ850458.1 | <i>Bothrops neuwiedi</i>      |
| 10                  | EU029756.1 | <i>Causus rhombeatus</i>      |
| 11                  | FJ754186.1 | <i>Cerastes cerastes</i>      |
| 12                  | FJ754187.1 | <i>Cerastes cerastes</i>      |
| 13                  | AY764138.1 | <i>Cerrophidion godmani</i>   |
| 14                  | HQ414104.1 | <i>Crotalus adamanteus</i>    |
| 15                  | AF269131.1 | <i>Crotalus atrox</i>         |
| 16                  | GQ466583.1 | <i>Crotalus durissus</i>      |

**Table S3:** Sequences Analyzed

|    |            |                                       |
|----|------------|---------------------------------------|
| 17 | X12606.1   | <i>Crotalus durissus terrificus</i>   |
| 18 | GQ168369.1 | <i>Crotalus horridus atricaudatus</i> |
| 19 | GQ168368.1 | <i>Crotalus horridus atricaudatus</i> |
| 20 | JF895776.1 | <i>Crotalus oreganus</i>              |
| 21 | JF895774.1 | <i>Crotalus oreganus helleri</i>      |
| 22 | JF895777.1 | <i>Crotalus oreganus helleri</i>      |
| 23 | U01026.1   | <i>Crotalus scutulatus</i>            |
| 24 | AF403137.1 | <i>Crotalus viridis</i>               |
| 25 | AY120875.1 | <i>Crotalus viridis viridis</i>       |
| 26 | X68386.1   | <i>Daboia russelli</i>                |
| 27 | X77649.1   | <i>Deinagkistrodon acutus</i>         |
| 28 | AY268946.2 | <i>Echis carinatus</i>                |
| 29 | AF539919.1 | <i>Echis carinatus sochureki</i>      |
| 30 | AF253049.1 | <i>Echis coloratus</i>                |
| 31 | AF253050.1 | <i>Echis coloratus</i>                |
| 32 | FM177947.1 | <i>Echis ocellatus</i>                |
| 33 | AF015242.1 | <i>Gloydius halys</i>                 |
| 34 | AY434727.1 | <i>Gloydius shedaoensis</i>           |
| 35 | GQ265920.1 | <i>Lachesis muta</i>                  |
| 36 | FM202092.1 | <i>Macrovipera lebetina</i>           |
| 37 | FJ905321.1 | <i>Macrovipera lebetina</i>           |
| 38 | EU421953.1 | <i>Macrovipera lebetina</i>           |
| 39 | D49390.1   | <i>Ovophis okinavensis</i>            |
| 40 | AB219805.1 | <i>Protobothrops elegans</i>          |
| 41 | AF408409.1 | <i>Protobothrops mucrosquamatus</i>   |
| 42 | AY355169.1 | <i>Sistrurus catenatus</i>            |
| 43 | AY508692.1 | <i>Sistrurus catenatus tergeminus</i> |
| 44 | AY508693.1 | <i>Sistrurus catenatus tergeminus</i> |
| 45 | EU369752.1 | <i>Sistrurus miliarius</i>            |
| 46 | EU369753.1 | <i>Sistrurus miliarius</i>            |
| 47 | EU369754.1 | <i>Sistrurus miliarius</i>            |
| 48 | EU369755.1 | <i>Sistrurus miliarius</i>            |
| 49 | AY355166.1 | <i>Sistrurus miliarius</i>            |
| 50 | AY355178.1 | <i>Trimeresurus borneensis</i>        |
| 51 | AY355179.1 | <i>Trimeresurus borneensis</i>        |
| 52 | D10721.1   | <i>Trimeresurus flavoviridis</i>      |
| 53 | AY764141.1 | <i>Trimeresurus gracilis</i>          |

**Table S3:** Sequences Analyzed

|    |            |                                     |
|----|------------|-------------------------------------|
| 54 | D31774.1   | <i>Trimeresurus gramineus</i>       |
| 55 | D31778.1   | <i>Trimeresurus gramineus</i>       |
| 56 | D31780.1   | <i>Trimeresurus gramineus</i>       |
| 57 | AF504039.1 | <i>Trimeresurus jerdonii</i>        |
| 58 | X77646.2   | <i>Trimeresurus mucrosquamatus</i>  |
| 59 | D49388.1   | <i>Trimeresurus okinavensis</i>     |
| 60 | AY355174.1 | <i>Trimeresurus puniceus</i>        |
| 61 | AY355173.1 | <i>Trimeresurus puniceus</i>        |
| 62 | AY355175.1 | <i>Trimeresurus puniceus</i>        |
| 63 | AY211939.1 | <i>Trimeresurus stejnegeri</i>      |
| 64 | AY211940.1 | <i>Trimeresurus stejnegeri</i>      |
| 65 | AY211942.1 | <i>Trimeresurus stejnegeri</i>      |
| 66 | AY211943.1 | <i>Trimeresurus stejnegeri</i>      |
| 67 | X52241.1   | <i>Vipera ammodytes</i>             |
| 68 | AJ580275.1 | <i>Vipera aspis</i>                 |
| 69 | AJ580191.1 | <i>Vipera berus</i>                 |
| 70 | AM707023.1 | <i>Vipera nikolskii</i>             |
| 71 | U60017.1   | <i>Vipera palaestinae</i>           |
| 72 | AF091854.1 | <i>Vipera palaestinae</i>           |
| 73 | AF091855.1 | <i>Vipera palaestinae</i>           |
| 74 | GQ304905.1 | <i>Vipera ursinii</i>               |
| 75 | AJ223188.1 | <i>Agkistrodon acutus</i>           |
| 76 | U21335.1   | <i>Agkistrodon contortrix</i>       |
| 77 | AF374236.1 | <i>Bothriechis schlegelii</i>       |
| 78 | JQ661501.1 | <i>Bothropoides diporus</i>         |
| 79 | AF109911.1 | <i>Bothrops asper</i>               |
| 80 | EU336943.1 | <i>Bothrops asper</i>               |
| 81 | AY431026.1 | <i>Bothrops atrox</i>               |
| 82 | AY185200.1 | <i>Bothrops jararacussu</i>         |
| 83 | AY299391.1 | <i>Bothrops jararacussu</i>         |
| 84 | X78599.2   | <i>Bothrops jararacussu</i>         |
| 85 | AF145759.1 | <i>Bothrops moojeni</i>             |
| 86 | AF145781.1 | <i>Bothrops neuwiedi pauloensis</i> |
| 87 | AF104066.1 | <i>Calloselasma rhodostoma</i>      |
| 88 | AF374237.1 | <i>Cerrophidion godmani</i>         |
| 89 | AY764140.1 | <i>Cerrophidion godmani</i>         |
| 90 | AF269130.1 | <i>Crotalus atrox</i>               |



**Table S3:** Sequences Analyzed

|     |            |                                     |
|-----|------------|-------------------------------------|
| 91  | AF269132.1 | <i>Deinagkistrodon acutus</i>       |
| 92  | AM411360.1 | <i>Deinagkistrodon acutus</i>       |
| 93  | AF015243.1 | <i>Gloydus halys</i>                |
| 94  | AB219806.1 | <i>Protobothrops elegans</i>        |
| 95  | AB219807.1 | <i>Protobothrops elegans</i>        |
| 96  | DQ299948.1 | <i>Protobothrops mucrosquamatus</i> |
| 97  | AY355177.1 | <i>Trimeresurus borneensis</i>      |
| 98  | D10718.1   | <i>Trimeresurus flavoviridis</i>    |
| 99  | D10719.1   | <i>Trimeresurus flavoviridis</i>    |
| 100 | D13383.1   | <i>Trimeresurus flavoviridis</i>    |
| 101 | D13384.1   | <i>Trimeresurus flavoviridis</i>    |
| 102 | AB470470.1 | <i>Trimeresurus flavoviridis</i>    |
| 103 | AY764142.1 | <i>Trimeresurus gracilis</i>        |
| 104 | D31775.1   | <i>Trimeresurus gramineus</i>       |
| 105 | D31779.1   | <i>Trimeresurus gramineus</i>       |
| 106 | D31781.1   | <i>Trimeresurus gramineus</i>       |
| 107 | D49389.1   | <i>Trimeresurus okinavensis</i>     |
| 108 | AY355171.1 | <i>Trimeresurus puniceus</i>        |
| 109 | AY355172.1 | <i>Trimeresurus puniceus</i>        |
| 110 | AY211934.1 | <i>Trimeresurus stejnegeri</i>      |
| 111 | AY211935.1 | <i>Trimeresurus stejnegeri</i>      |
| 112 | AY211936.1 | <i>Trimeresurus stejnegeri</i>      |
| 113 | AY211937.1 | <i>Trimeresurus stejnegeri</i>      |
| 114 | AY211938.1 | <i>Trimeresurus stejnegeri</i>      |
| 115 | X53036.1   | <i>Vipera ammodytes</i>             |
| 116 | X84017.1   | <i>Vipera ammodytes</i>             |
| 117 | AJ580254.1 | <i>Vipera ammodytes</i>             |
| 118 | AJ580257.1 | <i>Vipera ammodytes</i>             |
| 119 | AJ580258.1 | <i>Vipera ammodytes</i>             |
| 120 | AJ580260.1 | <i>Vipera ammodytes</i>             |
| 121 | AJ580261.1 | <i>Vipera ammodytes</i>             |
| 122 | AJ580263.1 | <i>Vipera ammodytes</i>             |
| 123 | AJ580264.1 | <i>Vipera ammodytes</i>             |
| 124 | AJ580272.1 | <i>Vipera ammodytes</i>             |
| 125 | AJ580251.1 | <i>Vipera ammodytes</i>             |
| 126 | AJ580252.1 | <i>Vipera ammodytes</i>             |
| 127 | AJ580267.1 | <i>Vipera ammodytes</i>             |

**Table S3:** Sequences Analyzed

|     |            |                         |
|-----|------------|-------------------------|
| 128 | AJ580266.1 | <i>Vipera ammodytes</i> |
| 129 | AJ580270.1 | <i>Vipera ammodytes</i> |
| 130 | AJ580269.1 | <i>Vipera ammodytes</i> |
| 131 | AJ580271.1 | <i>Vipera ammodytes</i> |
| 132 | AJ580255.1 | <i>Vipera ammodytes</i> |
| 133 | AJ580259.1 | <i>Vipera ammodytes</i> |
| 134 | AJ580256.1 | <i>Vipera ammodytes</i> |
| 135 | AJ580268.1 | <i>Vipera ammodytes</i> |
| 136 | AJ580262.1 | <i>Vipera ammodytes</i> |
| 137 | AJ580265.1 | <i>Vipera ammodytes</i> |
| 138 | AJ580243.1 | <i>Vipera berus</i>     |
| 139 | AJ580244.1 | <i>Vipera berus</i>     |
| 140 | AJ580245.1 | <i>Vipera berus</i>     |
| 141 | AJ580247.1 | <i>Vipera berus</i>     |
| 142 | AJ580248.1 | <i>Vipera berus</i>     |
| 143 | AJ580249.1 | <i>Vipera berus</i>     |
| 144 | AJ580250.1 | <i>Vipera berus</i>     |
| 145 | AJ580253.1 | <i>Vipera berus</i>     |
| 146 | AJ580246.1 | <i>Vipera berus</i>     |
| 147 | GQ304904.1 | <i>Vipera ursinii</i>   |
| 148 | FM177946.1 | <i>Echis ocellatus</i>  |

| <b>Psammophis monodomain SVMP</b> |            |                               |
|-----------------------------------|------------|-------------------------------|
| 1                                 | EU029730.1 | <i>Psammophis mossambicus</i> |
| 2                                 | EU029731.1 | <i>Psammophis mossambicus</i> |
| 3                                 | EU029732.1 | <i>Psammophis mossambicus</i> |
| 4                                 | EU029726.1 | <i>Psammophis mossambicus</i> |
| 5                                 | EU029733.1 | <i>Psammophis mossambicus</i> |
| 6                                 | EU029728.1 | <i>Psammophis mossambicus</i> |
| 7                                 | EU029727.1 | <i>Psammophis mossambicus</i> |
| 8                                 | EU029729.1 | <i>Psammophis mossambicus</i> |
| 9                                 | EU029708.1 | <i>Psammophis mossambicus</i> |
| 10                                | EU029710.1 | <i>Psammophis mossambicus</i> |
| 11                                | EU029709.1 | <i>Psammophis mossambicus</i> |
| 12                                | EU029722.1 | <i>Psammophis mossambicus</i> |
| 13                                | EU029723.1 | <i>Psammophis mossambicus</i> |
| 14                                | EU029724.1 | <i>Psammophis mossambicus</i> |

**Table S3: Sequences Analyzed**

|    |            |                               |
|----|------------|-------------------------------|
| 15 | EU029721.1 | <i>Psammophis mossambicus</i> |
| 16 | EU029711.1 | <i>Psammophis mossambicus</i> |
| 17 | EU029712.1 | <i>Psammophis mossambicus</i> |
| 18 | EU029725.1 | <i>Psammophis mossambicus</i> |
| 19 | EU029719.1 | <i>Psammophis mossambicus</i> |
| 20 | EU029717.1 | <i>Psammophis mossambicus</i> |
| 21 | EU029718.1 | <i>Psammophis mossambicus</i> |
| 22 | EU029720.1 | <i>Psammophis mossambicus</i> |
| 23 | EU029715.1 | <i>Psammophis mossambicus</i> |
| 24 | EU029716.1 | <i>Psammophis mossambicus</i> |
| 25 | EU029713.1 | <i>Psammophis mossambicus</i> |
| 26 | EU029714.1 | <i>Psammophis mossambicus</i> |

| <b>Lectins</b> |            |                                     |
|----------------|------------|-------------------------------------|
| 1              | HE800429.1 | <i>Bitis gabonica</i>               |
| 2              | HE800431.1 | <i>Bitis gabonica</i>               |
| 3              | KJ614391.1 | <i>Gloydus intermedius</i>          |
| 4              | AB036880.1 | <i>Deinagkistrodon acutus</i>       |
| 5              | AF102901.1 | <i>Deinagkistrodon acutus</i>       |
| 6              | AF463522.1 | <i>Deinagkistrodon acutus</i>       |
| 7              | AF176420.2 | <i>Deinagkistrodon acutus</i>       |
| 8              | AY091758.1 | <i>Deinagkistrodon acutus</i>       |
| 9              | AY091759.1 | <i>Deinagkistrodon acutus</i>       |
| 10             | AY091762.1 | <i>Deinagkistrodon acutus</i>       |
| 11             | AF540645.1 | <i>Deinagkistrodon acutus</i>       |
| 12             | AF540646.1 | <i>Deinagkistrodon acutus</i>       |
| 13             | GQ426542.1 | <i>Daboia russellii</i>             |
| 14             | GQ426544.1 | <i>Daboia russellii</i>             |
| 15             | GQ420352.1 | <i>Daboia russellii</i>             |
| 16             | GQ426536.1 | <i>Daboia russellii</i>             |
| 17             | GQ426548.1 | <i>Daboia russellii</i>             |
| 18             | DQ060414.1 | <i>Daboia russellii</i>             |
| 19             | DQ218272.1 | <i>Daboia russellii</i>             |
| 20             | GQ426534.1 | <i>Daboia russellii</i>             |
| 21             | GQ426538.1 | <i>Daboia russellii</i>             |
| 22             | GQ426540.1 | <i>Daboia russellii</i>             |
| 23             | GQ426546.1 | <i>Daboia russellii</i>             |
| 24             | DQ464258.1 | <i>Sistrurus catenatus edwardsi</i> |

**Table S3:** Sequences Analyzed

|    |            |                                |
|----|------------|--------------------------------|
| 25 | HQ414089.1 | <i>Crotalus adamanteus</i>     |
| 26 | HQ414092.1 | <i>Crotalus adamanteus</i>     |
| 27 | HQ414093.1 | <i>Crotalus adamanteus</i>     |
| 28 | HQ414096.1 | <i>Crotalus adamanteus</i>     |
| 29 | AB098253.1 | <i>Echis multisquamatus</i>    |
| 30 | AY429478.1 | <i>Bitis gabonica</i>          |
| 31 | AY429479.1 | <i>Bitis gabonica</i>          |
| 32 | AF190827.1 | <i>Gloydus halys</i>           |
| 33 | AY356354.1 | <i>Gloydus halys</i>           |
| 34 | AY346127.1 | <i>Gloydus halys</i>           |
| 35 | HE804182.1 | <i>Gloydus halys</i>           |
| 36 | AB848278.1 | <i>Ovophis okinavensis</i>     |
| 37 | AY962524.1 | <i>Bothrops jararaca</i>       |
| 38 | AB794990.1 | <i>Bothrops jararaca</i>       |
| 39 | AY578116.1 | <i>Macrovipera lebetina</i>    |
| 40 | EU085446.1 | <i>Macrovipera lebetina</i>    |
| 41 | EU085447.1 | <i>Macrovipera lebetina</i>    |
| 42 | EU085448.1 | <i>Macrovipera lebetina</i>    |
| 43 | EU085449.1 | <i>Macrovipera lebetina</i>    |
| 44 | EU085450.1 | <i>Macrovipera lebetina</i>    |
| 45 | EU085451.1 | <i>Macrovipera lebetina</i>    |
| 46 | EU085452.1 | <i>Macrovipera lebetina</i>    |
| 47 | EU085453.1 | <i>Macrovipera lebetina</i>    |
| 48 | EU085454.1 | <i>Macrovipera lebetina</i>    |
| 49 | EU085455.1 | <i>Macrovipera lebetina</i>    |
| 50 | EU085456.1 | <i>Macrovipera lebetina</i>    |
| 51 | EU085457.1 | <i>Macrovipera lebetina</i>    |
| 52 | EU085458.1 | <i>Macrovipera lebetina</i>    |
| 53 | EU085459.1 | <i>Macrovipera lebetina</i>    |
| 54 | EU085460.1 | <i>Macrovipera lebetina</i>    |
| 55 | EU085461.1 | <i>Macrovipera lebetina</i>    |
| 56 | KF836491.1 | <i>Macrovipera lebetina</i>    |
| 57 | KF836492.1 | <i>Macrovipera lebetina</i>    |
| 58 | KP202316.1 | <i>Macrovipera lebetina</i>    |
| 59 | KP202319.1 | <i>Macrovipera lebetina</i>    |
| 60 | KP202321.1 | <i>Macrovipera lebetina</i>    |
| 61 | AF244900.1 | <i>Calloselasma rhodostoma</i> |
| 62 | AB019615.1 | <i>Agkistrodon blomhoffi</i>   |
| 63 | KM527183.1 | <i>Philodryas chamissonis</i>  |

**Table S3: Sequences Analyzed**

|     |            |                                     |
|-----|------------|-------------------------------------|
| 64  | DQ912660.1 | <i>Philodryas chamissonis</i>       |
| 65  | AB984598.1 | <i>Protobothrops elegans</i>        |
| 66  | D83331.1   | <i>Trimeresurus flavoviridis</i>    |
| 67  | AB046491.1 | <i>Trimeresurus flavoviridis</i>    |
| 68  | AY149341.1 | <i>Trimeresurus flavoviridis</i>    |
| 69  | AB848117.1 | <i>Trimeresurus flavoviridis</i>    |
| 70  | AB848118.1 | <i>Trimeresurus flavoviridis</i>    |
| 71  | AB848119.1 | <i>Trimeresurus flavoviridis</i>    |
| 72  | AB848120.1 | <i>Trimeresurus flavoviridis</i>    |
| 73  | AB848121.1 | <i>Trimeresurus flavoviridis</i>    |
| 74  | AB848123.1 | <i>Trimeresurus flavoviridis</i>    |
| 75  | AB985229.1 | <i>Trimeresurus flavoviridis</i>    |
| 76  | AB985243.1 | <i>Trimeresurus flavoviridis</i>    |
| 77  | GU146049.1 | <i>Trimeresurus jerdonii</i>        |
| 78  | GU136389.1 | <i>Trimeresurus jerdonii</i>        |
| 79  | AY099321.1 | <i>Protobothrops mucrosquamatus</i> |
| 80  | AY390533.1 | <i>Protobothrops mucrosquamatus</i> |
| 81  | AY871785.1 | <i>Protobothrops mucrosquamatus</i> |
| 82  | AY254327.1 | <i>Bitis arietans</i>               |
| 83  | AY734997.1 | <i>Daboia russellii</i>             |
| 84  | JN582177.1 | <i>Daboia russellii</i>             |
| 85  | AF125309.1 | <i>Gloydus halys</i>                |
| 86  | JF895761.1 | <i>Crotalus oreganus helleri</i>    |
| 87  | JF895763.1 | <i>Crotalus oreganus helleri</i>    |
| 88  | JF895764.1 | <i>Crotalus oreganus helleri</i>    |
| 89  | AF354911.1 | <i>Trimeresurus stejnegeri</i>      |
| 90  | AF354918.1 | <i>Trimeresurus stejnegeri</i>      |
| 91  | AF354919.1 | <i>Trimeresurus stejnegeri</i>      |
| 92  | AF354920.1 | <i>Trimeresurus stejnegeri</i>      |
| 93  | AF354921.1 | <i>Trimeresurus stejnegeri</i>      |
| 94  | AF354922.1 | <i>Trimeresurus stejnegeri</i>      |
| 95  | AF354923.1 | <i>Trimeresurus stejnegeri</i>      |
| 96  | AF354924.1 | <i>Trimeresurus stejnegeri</i>      |
| 97  | Y16348.1   | <i>Crotalus durissus</i>            |
| 98  | AF541882.1 | <i>Crotalus durissus</i>            |
| 99  | AF541883.1 | <i>Crotalus durissus</i>            |
| 100 | EF690367.1 | <i>Cryptelytrops albolabris</i>     |

## **Table S3:** Sequences Analyzed

### **Legend**

This table provides accession numbers of sequences analyzed in this study and the scientific names of animals from which they were sequenced. Alignments generated by these sequences can be found as the archived supplemental file.
